# Supplementary material for: Laboratory studies of fresh and aged biomass burning aerosol emitted from east African biomass fuels – Part 2: Chemical properties and characterization
Source: Copernicus journal article supplement (doi:10.5194/acp-20-10169-2020), 2020-09-02
Supplement: Supplementary file 2 [file acp-20-10169-2020-supplement.zip]

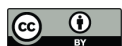

## *Supplement of*

# **Laboratory studies of fresh and aged biomass burning aerosol emitted from east African biomass fuels – Part 2: Chemical properties and characterization**

**Damon M. Smith et al.**

*Correspondence to:* Solomon Bililign (bililign@ncat.edu)

- [acp-20-10169-2020-supplement-title-page.pdf](#)
- [Part 2 supplemental Figures-8-2-20.pdf](#)
- [SI Information \(3\)\\_Part 2\\_8-2-20.xlsx](#)

The copyright of individual parts of the supplement might differ from the CC BY 4.0 License.
