# Supplementary material for: Laboratory studies of fresh and aged biomass burning aerosol emitted from east African biomass fuels – Part 2: Chemical properties and characterization
Source: Copernicus journal article supplement (doi:10.5194/acp-20-10169-2020), 2020-09-02
Supplement: Supplementary file 3 [file acp-20-10169-2020-supplement.zip]

Archive with 3 entries (3 files):
- Part 2 supplemental Figures-8-2-20.pdf
- SI Information (3)_Part 2_8-2-20.xlsx
- acp-20-10169-2020-supplement-title-page.pdf
