# Supplementary material for: Laboratory studies of fresh and aged biomass burning aerosol emitted from east African biomass fuels – Part 2: Chemical properties and characterization
Source: Copernicus journal article supplement (doi:10.5194/acp-20-10169-2020), 2020-09-02
Supplement: Supplementary file 3 [file acp-20-10169-2020-supplement.zip › SI Information (3)_Part 2_8-2-20.xlsx]

## Sheet: UV-Vis Aged
All species are ageed in the presence of UV light and AVOCs
	Raw Integrated					Blank Subtracted				Normalized
nm	Acacia 800 VOC	Acacia 500 VOC	Euc 800 VOC	Euc 500 VOC	blank	Acacia 800 VOC	Acacia 500 VOC	Euc 800 VOC	Euc 500 VOC	Acacia 800 VOC	Acacia 500 VOC	Euc 800 VOC	Euc 500 VOC
200	426.142	425.075	419.243	424.625	420.105	6.03738	4.96942	-0.862457	4.51968	32.0768	3.4926	-5.44167	2.47981
202	335.518	333.871	328.135	333.499	329.072	6.44626	4.79886	-0.936188	4.42697	34.2058	3.37371	-5.92642	2.42924
204	265.941	263.904	258.371	263.628	259.273	6.66879	4.63165	-0.902069	4.35553	35.3646	3.25715	-5.70211	2.39027
206	212.541	210.497	205.23	210.297	206.117	6.42363	4.37955	-0.887604	4.17947	34.088	3.0814	-5.607	2.29424
208	177.515	175.417	170.46	175.398	171.271	6.24423	4.14619	-0.81073	4.12672	33.1538	2.91873	-5.10159	2.26547
210	156.448	154.619	149.889	154.636	150.654	5.79367	3.96513	-0.765442	3.98218	30.8077	2.79252	-4.80384	2.18663
212	142.932	141.434	136.989	141.455	137.673	5.25911	3.76071	-0.684052	3.78157	28.0242	2.65001	-4.26873	2.07721
214	132.639	131.378	127.244	131.521	127.823	4.8165	3.55551	-0.578407	3.69785	25.7195	2.50697	-3.57416	2.03154
216	123.237	122.311	118.456	122.523	118.887	4.34969	3.42377	-0.430893	3.63552	23.2888	2.41513	-2.60431	1.99755
218	113.858	113.271	109.673	113.499	110.082	3.77528	3.18896	-0.409836	3.41642	20.2978	2.25144	-2.46586	1.87804
220	103.964	103.688	100.382	103.987	100.722	3.24271	2.96642	-0.339439	3.26556	17.5246	2.09631	-2.00304	1.79575
222	93.1423	93.2254	90.1201	93.5435	90.4299	2.71234	2.79551	-0.309807	3.11354	14.763	1.97717	-1.80821	1.71284
224	81.3918	81.7551	78.9506	82.1114	79.1587	2.23312	2.59639	-0.208076	2.95267	12.2677	1.83836	-1.13938	1.6251
226	69.3176	69.9389	67.4055	70.3509	67.5537	1.76388	2.38515	-0.148254	2.79713	9.82427	1.69111	-0.746068	1.54026
228	57.6244	58.5549	56.2096	58.9175	56.3016	1.32277	2.25328	-0.0920792	2.6159	7.52738	1.59918	-0.376738	1.4414
230	46.8394	47.9507	45.7984	48.3683	45.8439	0.995491	2.10675	-0.0455475	2.52438	5.82322	1.49703	-0.0708104	1.39149
232	37.2676	38.5219	36.554	38.9319	36.5528	0.714832	1.96907	0.00121307	2.37909	4.36181	1.40106	0.236622	1.31224
234	29.0818	30.4545	28.6253	30.8563	28.5909	0.490929	1.86356	0.0344067	2.26535	3.19592	1.32751	0.454857	1.2502
236	22.2843	23.7356	22.041	24.1573	21.9857	0.298605	1.74991	0.0553226	2.17162	2.19448	1.24829	0.592371	1.19907
238	16.7139	18.1919	16.5919	18.6218	16.5233	0.190603	1.66859	0.068676	2.09852	1.6321	1.19159	0.680165	1.1592
240	12.4098	13.9087	12.381	14.3237	12.3074	0.102413	1.60138	0.0736485	2.01635	1.17289	1.14474	0.712857	1.11439
242	9.01331	10.5238	9.06093	10.942	8.99163	0.021677	1.53218	0.0692978	1.95037	0.75249	1.0965	0.684253	1.0784
244	6.41065	7.90746	6.47332	8.28732	6.39126	0.0193872	1.5162	0.0820522	1.89606	0.740567	1.08536	0.768108	1.04877
246	4.39231	5.86284	4.49107	6.28315	4.39353	-0.00121737	1.46932	0.0975385	1.88963	0.633278	1.05268	0.869924	1.04527
248	2.87809	4.34611	3.01164	4.73386	2.92759	-0.0494947	1.41852	0.0840545	1.80628	0.381893	1.01727	0.781272	0.999802
250	1.83907	3.27535	1.96727	3.70539	1.89874	-0.0596735	1.37661	0.0685258	1.80665	0.328892	0.988058	0.679177	1.00001
252	1.10829	2.53448	1.24578	2.93711	1.14073	-0.0324367	1.39375	0.105053	1.79638	0.470716	1.00001	0.919328	0.994404
254	0.598323	2.00955	0.740332	2.38283	0.643417	-0.0450945	1.36613	0.0969149	1.73941	0.404806	0.980753	0.865824	0.963332
256	0.208807	1.62568	0.374607	2.00531	0.279721	-0.0709138	1.34596	0.0948859	1.72559	0.270363	0.966692	0.852484	0.955794
258	-0.0916038	1.33711	0.0872057	1.72124	0.0312221	-0.122826	1.30589	0.0559836	1.69002	5.20708e-05	0.938755	0.596717	0.936393
260	-0.244112	1.10782	-0.0943395	1.50096	-0.170566	-0.0735459	1.27838	0.0762265	1.67153	0.256657	0.919583	0.729806	0.926306
262	-0.392117	0.946849	-0.234808	1.28662	-0.340453	-0.0516645	1.2873	0.105645	1.62707	0.370595	0.925799	0.92322	0.902057
264	-0.491337	0.797976	-0.338291	1.15744	-0.440425	-0.0509123	1.2384	0.102134	1.59787	0.374512	0.891711	0.900141	0.886128
266	-0.567537	0.692501	-0.41869	1.03756	-0.504543	-0.0629935	1.19704	0.0858529	1.5421	0.311604	0.86288	0.793096	0.85571
268	-0.603891	0.603798	-0.465554	0.959947	-0.558407	-0.0454841	1.16221	0.0928538	1.51835	0.402777	0.838595	0.839124	0.842758
270	-0.659633	0.555376	-0.502804	0.867701	-0.586819	-0.0728144	1.14219	0.084015	1.45452	0.260466	0.824645	0.781013	0.80794
272	-0.688494	0.465855	-0.563106	0.790033	-0.647565	-0.0409293	1.11342	0.0844591	1.4376	0.426494	0.804586	0.783932	0.79871
274	-0.730179	0.383131	-0.584433	0.694587	-0.672203	-0.0579759	1.05533	0.0877702	1.36679	0.337731	0.764095	0.805701	0.760089
276	-0.762137	0.308523	-0.636518	0.613413	-0.699296	-0.0628412	1.00782	0.0627782	1.31271	0.312397	0.730972	0.641389	0.73059
278	-0.841777	0.262447	-0.693181	0.538484	-0.741927	-0.0998503	1.00437	0.0487454	1.28041	0.119688	0.72857	0.549129	0.712974
280	-0.84853	0.171676	-0.725473	0.443135	-0.798974	-0.0495564	0.97065	0.0735014	1.24211	0.381572	0.705061	0.71189	0.692083
282	-0.903776	0.0957967	-0.757607	0.366061	-0.861324	-0.0424525	0.95712	0.103717	1.22738	0.418563	0.69563	0.910545	0.684051
284	-0.930723	0.0247084	-0.814465	0.269485	-0.870574	-0.060149	0.895283	0.0561098	1.14006	0.326416	0.652523	0.597547	0.63642
286	-0.981985	-0.0478694	-0.842886	0.223124	-0.949166	-0.0328193	0.901296	0.10628	1.17229	0.468724	0.656715	0.927393	0.654
288	-1.01323	-0.112918	-0.869174	0.152883	-0.986507	-0.0267275	0.873589	0.117333	1.13939	0.500444	0.6374	1.00007	0.636055
290	-1.01917	-0.180746	-0.933766	0.0747619	-0.987871	-0.0313002	0.807126	0.0541055	1.06263	0.476634	0.591068	0.584369	0.594189
292	-1.05424	-0.205556	-0.953869	-0.00086283	-1.03947	-0.014769	0.833918	0.0856051	1.03861	0.562713	0.609745	0.791467	0.581086
294	-1.0899	-0.254014	-0.982274	-0.047985	-1.04664	-0.0432595	0.792628	0.0643679	0.998657	0.414361	0.580962	0.651841	0.559294
296	-1.08692	-0.309418	-0.975256	-0.0920416	-1.06361	-0.023301	0.754197	0.0883589	0.971573	0.518286	0.554172	0.809572	0.544521
298	-1.10382	-0.354317	-0.992308	-0.11943	-1.06848	-0.0353488	0.714158	0.0761669	0.949045	0.455553	0.526261	0.729414	0.532233
300	-1.10071	-0.373953	-0.984142	-0.14918	-1.06444	-0.0362712	0.690487	0.0802981	0.91526	0.450749	0.50976	0.756576	0.513805
302	-1.09004	-0.385254	-0.972614	-0.167586	-1.055	-0.0350362	0.66975	0.0823911	0.887419	0.45718	0.495304	0.770336	0.49862
304	-1.07077	-0.40359	-0.960123	-0.190524	-1.01321	-0.0575542	0.609623	0.0530898	0.822689	0.339927	0.453389	0.577691	0.463313
306	-1.05156	-0.414346	-0.954359	-0.197937	-0.999896	-0.0516654	0.58555	0.0455368	0.801958	0.370591	0.436608	0.528033	0.452006
308	-1.02799	-0.426064	-0.934465	-0.213163	-1.00003	-0.0279543	0.573967	0.0655663	0.786868	0.494056	0.428533	0.65972	0.443775
310	-1.00055	-0.426654	-0.912529	-0.208987	-0.984839	-0.0157124	0.558185	0.0723096	0.775852	0.557801	0.417532	0.704054	0.437767
312	-0.994034	-0.409612	-0.907073	-0.229854	-0.946307	-0.0477264	0.536695	0.0392343	0.716453	0.391101	0.402551	0.486597	0.405368
314	-1.00168	-0.389127	-0.903115	-0.227637	-0.93724	-0.0644386	0.548113	0.0341253	0.709604	0.304079	0.41051	0.453007	0.401632
316	-0.945755	-0.409408	-0.895332	-0.238827	-0.923916	-0.0218388	0.514508	0.0285839	0.685089	0.5259	0.387084	0.416575	0.388261
318	-0.931982	-0.420955	-0.863137	-0.279673	-0.921886	-0.0100958	0.500931	0.0587495	0.642213	0.587047	0.37762	0.614902	0.364874
320	-0.944956	-0.439022	-0.872228	-0.262864	-0.912857	-0.032099	0.473834	0.0406281	0.649993	0.472474	0.358731	0.495761	0.369118
322	-0.942081	-0.457566	-0.862991	-0.293483	-0.895441	-0.0466401	0.437875	0.0324508	0.601958	0.396758	0.333664	0.441998	0.342918
324	-0.925731	-0.467062	-0.840257	-0.291505	-0.92972	0.0039891	0.462659	0.0894639	0.638215	0.660388	0.35094	0.816837	0.362694
326	-0.924596	-0.475853	-0.858303	-0.309597	-0.9106	-0.0139959	0.434747	0.0522968	0.601004	0.566739	0.331483	0.572477	0.342397
328	-0.941263	-0.505073	-0.847198	-0.35112	-0.912573	-0.0286896	0.407501	0.0653753	0.561453	0.490228	0.31249	0.658464	0.320825
330	-0.91635	-0.491055	-0.840673	-0.37327	-0.909229	-0.00712138	0.418174	0.0685561	0.535959	0.602535	0.31993	0.679376	0.306919
332	-0.91314	-0.528442	-0.852457	-0.403575	-0.88536	-0.0277804	0.356918	0.032903	0.481785	0.494962	0.277228	0.444971	0.27737
334	-0.952079	-0.510116	-0.850967	-0.400795	-0.904009	-0.04807	0.393893	0.053042	0.503214	0.389312	0.303004	0.577377	0.289059
336	-0.925821	-0.549899	-0.855566	-0.417066	-0.899354	-0.0264676	0.349455	0.0437882	0.482287	0.501798	0.272026	0.516537	0.277644
338	-0.931297	-0.538445	-0.843983	-0.449299	-0.918538	-0.0127591	0.380093	0.0745554	0.469239	0.573179	0.293384	0.718819	0.270527
340	-0.952353	-0.555213	-0.831267	-0.441481	-0.902997	-0.0493568	0.347784	0.0717302	0.461516	0.382612	0.270861	0.700245	0.266315
342	-0.913597	-0.56876	-0.851663	-0.480339	-0.896686	-0.0169105	0.327926	0.0450235	0.416347	0.551562	0.257019	0.524659	0.241678
344	-0.885422	-0.599494	-0.827394	-0.455406	-0.92423	0.0388079	0.324736	0.0968356	0.468824	0.841693	0.254795	0.865303	0.270301
346	-0.899713	-0.593636	-0.843145	-0.469726	-0.897412	-0.00230062	0.303776	0.0542677	0.427686	0.627637	0.240183	0.585436	0.247863
348	-0.886109	-0.591357	-0.81332	-0.508415	-0.872862	-0.0132475	0.281505	0.0595418	0.364447	0.570635	0.224658	0.620111	0.213369
350	-0.90028	-0.575516	-0.846299	-0.480906	-0.858541	-0.0417387	0.283025	0.0122421	0.377635	0.42228	0.225718	0.309134	0.220563
352	-0.861785	-0.584603	-0.791905	-0.490646	-0.847404	-0.0143808	0.262801	0.0554985	0.356758	0.564735	0.211619	0.593528	0.209175
354	-0.851288	-0.577111	-0.817931	-0.520693	-0.819053	-0.0322354	0.241942	0.00112158	0.29836	0.471764	0.197079	0.236021	0.177323
356	-0.840676	-0.574905	-0.781056	-0.469434	-0.818877	-0.0217988	0.243972	0.0378211	0.349443	0.526108	0.198494	0.477305	0.205186
358	-0.820853	-0.565924	-0.767487	-0.484853	-0.815785	-0.00506806	0.249861	0.0482979	0.330932	0.613227	0.202599	0.546187	0.195089
360	-0.793357	-0.555847	-0.735299	-0.471339	-0.799983	0.00662625	0.244136	0.0646844	0.328644	0.67412	0.198608	0.653921	0.193841
362	-0.784255	-0.525977	-0.728048	-0.482105	-0.747983	-0.0362728	0.222005	0.0199345	0.265878	0.450741	0.183181	0.359708	0.159606
364	-0.75139	-0.555138	-0.692046	-0.483968	-0.74917	-0.00222069	0.194031	0.0571234	0.265202	0.628053	0.16368	0.60421	0.159237
366	-0.734089	-0.545499	-0.673409	-0.446818	-0.750999	0.0169105	0.2055	0.07759	0.304182	0.727671	0.171675	0.738771	0.180498
368	-0.704268	-0.534999	-0.691415	-0.442131	-0.727912	0.023644	0.192914	0.0364974	0.285781	0.762733	0.162901	0.468603	0.170462
370	-0.777383	-0.49086	-0.683278	-0.463804	-0.6985	-0.0788824	0.207641	0.0152224	0.234696	0.22887	0.173167	0.328728	0.142598
372	-0.720078	-0.563881	-0.684323	-0.49427	-0.750027	0.0299488	0.186146	0.0657042	0.255757	0.795562	0.158183	0.660626	0.154085
374	-0.720883	-0.52753	-0.692336	-0.526027	-0.664718	-0.0561652	0.137187	-0.0276188	0.138691	0.34716	0.124054	0.0470636	0.0902329
376	-0.712579	-0.538465	-0.662249	-0.488836	-0.738058	0.0254798	0.199593	0.0758089	0.249222	0.772292	0.167557	0.727061	0.150521
378	-0.721398	-0.556677	-0.686033	-0.480107	-0.697709	-0.0236889	0.141031	0.0116756	0.217602	0.516266	0.126734	0.305409	0.133274
380	-0.683046	-0.530174	-0.676684	-0.463839	-0.700508	0.0174628	0.170335	0.0238245	0.23667	0.730547	0.147161	0.385283	0.143675
382	-0.700464	-0.549161	-0.663523	-0.50017	-0.702599	0.00213492	0.153439	0.0390766	0.202429	0.650733	0.135383	0.48556	0.124998
384	-0.698439	-0.59371	-0.675193	-0.509188	-0.713363	0.0149236	0.119653	0.0381693	0.204175	0.717325	0.111831	0.479595	0.12595
386	-0.725524	-0.58344	-0.680464	-0.529688	-0.744017	0.0184925	0.160576	0.0635521	0.214328	0.735908	0.140359	0.646477	0.131489
388	-0.737553	-0.571479	-0.692823	-0.528364	-0.739511	0.00195789	0.168032	0.0466883	0.211147	0.649811	0.145556	0.535604	0.129753
390	-0.709391	-0.61046	-0.702918	-0.569657	-0.735009	0.0256173	0.124549	0.032091	0.165351	0.773008	0.115244	0.439633	0.104774
392	-0.742948	-0.608604	-0.69198	-0.566832	-0.726377	-0.0165715	0.117773	0.0343964	0.159545	0.553327	0.11052	0.45479	0.101607
394	-0.770476	-0.617536	-0.674752	-0.58619	-0.73	-0.0404759	0.112464	0.0552475	0.14381	0.428855	0.10682	0.591877	0.093025
396	-0.742008	-0.613411	-0.700507	-0.54723	-0.734125	-0.00788343	0.120714	0.0336178	0.186895	0.598567	0.112571	0.449671	0.116525
398	-0.708178	-0.649734	-0.696561	-0.563779	-0.712736	0.00455827	0.0630022	0.0161759	0.148957	0.663352	0.0723398	0.334997	0.0958323
400	-0.698976	-0.599091	-0.652331	-0.532188	-0.713952	0.0149767	0.114861	0.0616214	0.181764	0.717601	0.108491	0.633783	0.113727
402	-0.728656	-0.610209	-0.704927	-0.544266	-0.703825	-0.0248309	0.0936166	-0.00110126	0.15956	0.51032	0.0936811	0.221406	0.101615
404	-0.714007	-0.621501	-0.682445	-0.550058	-0.74558	0.0315725	0.124079	0.0631354	0.195522	0.804017	0.114917	0.643738	0.121231
406	-0.721548	-0.637326	-0.695492	-0.58456	-0.730695	0.00914711	0.0933688	0.0352027	0.146135	0.687246	0.0935084	0.460091	0.0942929
408	-0.739363	-0.611223	-0.714153	-0.592183	-0.72355	-0.0158125	0.112327	0.00939727	0.131368	0.55728	0.106724	0.29043	0.0862383
410	-0.72732	-0.655421	-0.71337	-0.634551	-0.678603	-0.0487174	0.0231822	-0.0347672	0.0440523	0.385941	0.0445813	6.57461e-05	0.038613
412	-0.736528	-0.628952	-0.706308	-0.606315	-0.722195	-0.0143332	0.0932433	0.0158872	0.11588	0.564982	0.0934209	0.333099	0.0777907
414	-0.724408	-0.631548	-0.691101	-0.603707	-0.744067	0.0196594	0.11252	0.0529666	0.140361	0.741985	0.106859	0.576881	0.0911437
416	-0.70981	-0.637234	-0.686895	-0.604827	-0.719188	0.00937796	0.0819539	0.0322924	0.11436	0.688448	0.0855511	0.440956	0.076962
418	-0.734342	-0.626102	-0.693286	-0.6012	-0.713239	-0.0211026	0.0871371	0.0199538	0.112039	0.529734	0.0891643	0.359835	0.0756958
420	-0.73935	-0.60368	-0.699067	-0.610554	-0.6763	-0.0630493	0.0726205	-0.0227662	0.0657466	0.311314	0.0790447	0.0789679	0.050446
422	-0.691786	-0.599154	-0.645683	-0.592569	-0.652078	-0.0397087	0.0529236	0.00639498	0.0595084	0.43285	0.065314	0.270691	0.0470434
424	-0.66129	-0.592497	-0.637133	-0.570351	-0.65302	-0.00827074	0.0605222	0.0158867	0.0826689	0.59655	0.070611	0.333096	0.0596761
426	-0.664511	-0.596509	-0.660677	-0.565548	-0.653394	-0.0111175	0.0568843	-0.00728369	0.0878462	0.581727	0.0680751	0.180759	0.0625
428	-0.632884	-0.563052	-0.615137	-0.53551	-0.636968	0.00408453	0.0739161	0.0218316	0.101459	0.660885	0.0799479	0.372181	0.0699248
430	-0.607589	-0.556023	-0.60464	-0.555172	-0.613246	0.00565749	0.0572239	0.00860661	0.0580744	0.669076	0.0683118	0.285232	0.0462613
432	-0.615828	-0.543608	-0.579354	-0.499119	-0.617958	0.00212985	0.0743507	0.0386044	0.118839	0.650707	0.0802508	0.482455	0.0794047
434	-0.579095	-0.533908	-0.535871	-0.468359	-0.614713	0.0356172	0.0808049	0.0788419	0.146354	0.825078	0.0847501	0.747001	0.0944126
436	-0.572302	-0.488936	-0.52985	-0.490107	-0.59401	0.0217075	0.105074	0.06416	0.103903	0.752649	0.101668	0.650474	0.071258
438	-0.630138	-0.518361	-0.565008	-0.507143	-0.616374	-0.0137643	0.098013	0.0513653	0.109231	0.567945	0.0967459	0.566354	0.0741641
440	-0.620546	-0.483754	-0.530845	-0.497754	-0.565456	-0.0550894	0.0817022	0.0346118	0.0677021	0.352762	0.0853756	0.456206	0.0515126
442	-0.600283	-0.499443	-0.534974	-0.482212	-0.573049	-0.0272343	0.0736062	0.0380747	0.0908374	0.497805	0.0797319	0.478973	0.0641316
444	-0.565727	-0.503192	-0.524144	-0.47032	-0.551682	-0.0140443	0.0484906	0.027538	0.081362	0.566487	0.0622238	0.409698	0.0589633
446	-0.527793	-0.490056	-0.499548	-0.440901	-0.527531	-0.000261784	0.0374752	0.0279824	0.0866298	0.638253	0.054545	0.41262	0.0618365
448	-0.516614	-0.47876	-0.491531	-0.460757	-0.535902	0.0192879	0.057142	0.0443707	0.075145	0.74005	0.0682547	0.520367	0.0555723
450	-0.493944	-0.463439	-0.480374	-0.423469	-0.533579	0.0396357	0.0701406	0.0532051	0.11011	0.846003	0.077316	0.578449	0.0746437
452	-0.518669	-0.438	-0.47143	-0.461978	-0.523576	0.00490654	0.0855761	0.0521462	0.0615982	0.665165	0.0880761	0.571487	0.0481833
454	-0.520855	-0.485412	-0.458369	-0.426948	-0.518857	-0.0019986	0.0334449	0.060487	0.0919088	0.62921	0.0517354	0.626325	0.064716
456	-0.512275	-0.47463	-0.477178	-0.434717	-0.526138	0.0138637	0.0515082	0.0489602	0.091421	0.711806	0.0643274	0.550541	0.0644499
458	-0.479446	-0.482275	-0.452939	-0.444692	-0.516641	0.0371951	0.0343665	0.0637026	0.0719496	0.833294	0.0523779	0.647466	0.0538294
460	-0.539952	-0.446286	-0.463632	-0.407068	-0.505835	-0.0341168	0.0595487	0.0422029	0.0987672	0.461968	0.0699324	0.506114	0.0684568
462	-0.508472	-0.438064	-0.432531	-0.442246	-0.498096	-0.0103759	0.0600325	0.0655654	0.0558508	0.585589	0.0702697	0.659714	0.0450484
464	-0.450547	-0.437016	-0.445502	-0.427637	-0.451408	0.000861496	0.0143921	0.00590652	0.023771	0.644102	0.0384537	0.26748	0.0275508
466	-0.424475	-0.418205	-0.404862	-0.403687	-0.438434	0.013959	0.0202296	0.0335725	0.0347471	0.712302	0.0425231	0.449372	0.0335376
468	-0.439602	-0.396743	-0.42602	-0.371745	-0.47136	0.0317586	0.0746175	0.0453407	0.0996149	0.804986	0.0804369	0.526744	0.0689192
470	-0.385844	-0.381736	-0.395414	-0.338711	-0.453037	0.067193	0.0713006	0.0576223	0.114326	0.989496	0.0781247	0.607491	0.0769432
472	-0.434673	-0.389126	-0.400503	-0.354841	-0.457817	0.0231437	0.0686914	0.0573137	0.102976	0.760128	0.0763057	0.605462	0.0707526
474	-0.452627	-0.409732	-0.424904	-0.385591	-0.455577	0.00294957	0.0458442	0.0306728	0.0699857	0.654975	0.060379	0.430309	0.0527581
476	-0.439793	-0.440785	-0.415276	-0.384481	-0.484374	0.0445811	0.0435887	0.0690971	0.099893	0.871754	0.0588067	0.682933	0.0690708
478	-0.447093	-0.401845	-0.404072	-0.377293	-0.452504	0.00541049	0.0506586	0.0484318	0.0752108	0.667789	0.0637351	0.547067	0.0556081
480	-0.407206	-0.369343	-0.389899	-0.368042	-0.41734	0.010134	0.0479966	0.0274411	0.0492977	0.692385	0.0618794	0.409061	0.0414741
482	-0.561558	-0.531214	-0.532018	-0.525937	-0.569833	0.0082745	0.0386185	0.0378153	0.0438958	0.682702	0.055342	0.477268	0.0385277
484	-0.462061	-0.442069	-0.443282	-0.399107	-0.511998	0.0499378	0.0699295	0.0687168	0.112891	0.899646	0.0771689	0.680433	0.0761607
486	-0.402355	-0.373533	-0.375612	-0.345962	-0.4078	0.00544468	0.0342666	0.0321884	0.0618376	0.667967	0.0523082	0.440273	0.0483139
488	-0.370615	-0.339872	-0.350316	-0.312836	-0.386128	0.0155132	0.0462562	0.0358123	0.0732917	0.720395	0.0606662	0.464098	0.0545614
490	-0.29911	-0.281147	-0.27985	-0.242328	-0.308579	0.00946957	0.0274322	0.028729	0.0662518	0.688925	0.047544	0.417529	0.0507216
492	-0.279987	-0.289948	-0.269926	-0.270107	-0.310862	0.0308754	0.0209146	0.0409361	0.0407549	0.800387	0.0430006	0.497786	0.0368145
494	-0.408019	-0.333727	-0.341475	-0.311091	-0.370824	-0.0371941	0.0370975	0.0293495	0.0597336	0.445944	0.0542816	0.421608	0.0471662
496	-0.363933	-0.344051	-0.37248	-0.311724	-0.396852	0.0329191	0.0528008	0.0243717	0.0851283	0.811029	0.0652284	0.388881	0.0610176
498	-0.346548	-0.361298	-0.308588	-0.343693	-0.399953	0.0534053	0.0386548	0.0913652	0.0562599	0.917702	0.0553673	0.829337	0.0452715
500	-0.347751	-0.349814	-0.331799	-0.317194	-0.365848	0.0180973	0.0160341	0.0340489	0.0486544	0.73385	0.0395983	0.452505	0.0411232
502	-0.333109	-0.33541	-0.31614	-0.311144	-0.323804	-0.00930467	-0.0116065	0.00766388	0.0126595	0.591166	0.0203301	0.279034	0.0214901
504	-0.315661	-0.325287	-0.310966	-0.283027	-0.384881	0.0692203	0.0595937	0.0739154	0.101854	1.00005	0.0699638	0.714612	0.0701405
506	-0.309005	-0.305166	-0.312301	-0.305749	-0.34022	0.0312152	0.035054	0.0279193	0.0344714	0.802157	0.0528571	0.412205	0.0333872
508	-0.285901	-0.301451	-0.301765	-0.300064	-0.336051	0.0501495	0.0345995	0.0342853	0.0359868	0.900749	0.0525403	0.454059	0.0342137
510	-0.303801	-0.280522	-0.285414	-0.289103	-0.306914	0.00311244	0.0263923	0.0214997	0.0178111	0.655823	0.046819	0.369999	0.0243
512	-0.320861	-0.289866	-0.274536	-0.272522	-0.321367	0.00050655	0.0315017	0.0468315	0.0488451	0.642254	0.0503808	0.536545	0.0412272
514	-0.280876	-0.3016	-0.284804	-0.27994	-0.292867	0.0119911	-0.00873277	0.00806293	0.012927	0.702055	0.0223334	0.281657	0.021636
516	-0.279378	-0.279323	-0.284677	-0.265981	-0.298904	0.0195266	0.0195817	0.0142277	0.0329237	0.741293	0.0420714	0.322188	0.032543
518	-0.267583	-0.276389	-0.251665	-0.261765	-0.316558	0.0489754	0.0401691	0.064893	0.0547929	0.894635	0.0564228	0.655293	0.0444714
520	-0.242971	-0.244167	-0.229378	-0.268451	-0.275973	0.0330015	0.0318053	0.0465942	0.00752169	0.811458	0.0505924	0.534986	0.0186877
522	-0.257252	-0.233726	-0.239792	-0.252212	-0.270376	0.0131244	0.0366499	0.0305838	0.0181641	0.707956	0.0539696	0.429723	0.0244925
524	-0.237865	-0.230439	-0.242815	-0.21449	-0.271264	0.0333994	0.0408246	0.0284487	0.0567744	0.81353	0.0568798	0.415686	0.0455522
526	-0.236088	-0.224271	-0.230261	-0.219665	-0.263731	0.027643	0.0394601	0.0334702	0.0440662	0.783556	0.0559286	0.4487	0.0386206
528	-0.270366	-0.224904	-0.211961	-0.202692	-0.269683	-0.000683337	0.0447792	0.0577219	0.0669909	0.636058	0.0596365	0.608146	0.0511247
530	-0.221799	-0.235518	-0.201446	-0.209383	-0.24373	0.0219308	0.00821178	0.0422837	0.0343471	0.753812	0.0341454	0.506645	0.0333194
532	-0.235262	-0.230351	-0.213135	-0.21811	-0.273185	0.0379233	0.042834	0.0600504	0.0550755	0.837086	0.0582806	0.623454	0.0446256
534	-0.237451	-0.223039	-0.217803	-0.21714	-0.2493	0.0118489	0.026261	0.0314975	0.0321604	0.701315	0.0467275	0.43573	0.0321267
536	-0.228245	-0.201705	-0.206499	-0.197451	-0.235296	0.00705071	0.0335909	0.0287964	0.0378451	0.67633	0.0518372	0.417972	0.0352274
538	-0.215624	-0.207691	-0.198058	-0.196345	-0.263341	0.0477169	0.0556507	0.0652834	0.0669967	0.888083	0.0672151	0.65786	0.0511278
540	-0.213386	-0.233052	-0.185091	-0.209069	-0.255079	0.0416937	0.0220277	0.0699886	0.0460105	0.856719	0.0437765	0.688794	0.0396811
542	-0.204877	-0.19466	-0.188502	-0.198811	-0.233543	0.0286664	0.0388829	0.0450409	0.0347319	0.788885	0.0555263	0.524773	0.0335293
544	-0.206306	-0.193765	-0.171335	-0.176572	-0.237027	0.0307209	0.0432618	0.0656924	0.0604551	0.799583	0.0585788	0.660549	0.0475598
546	-0.178248	-0.2165	-0.192164	-0.159677	-0.220265	0.0420175	0.00376561	0.0281018	0.0605879	0.858405	0.031046	0.413405	0.0476322
548	-0.177944	-0.182813	-0.19608	-0.175559	-0.217613	0.0396698	0.0348008	0.0215335	0.042054	0.84618	0.0526807	0.370221	0.037523
550	-0.17567	-0.193608	-0.173877	-0.165891	-0.201731	0.0260613	0.00812297	0.0278544	0.0358401	0.77532	0.0340835	0.411778	0.0341338
552	-0.186633	-0.180168	-0.158077	-0.172585	-0.208501	0.0218678	0.028333	0.050424	0.0359158	0.753484	0.048172	0.560165	0.0341751
554	-0.176836	-0.169377	-0.157812	-0.155134	-0.194524	0.0176884	0.0251465	0.0367123	0.0393904	0.731722	0.0459506	0.470016	0.0360702
556	-0.188807	-0.194132	-0.167757	-0.139898	-0.212041	0.0232343	0.017909	0.044284	0.0721431	0.7606	0.0409054	0.519797	0.0539349
558	-0.160626	-0.195198	-0.13054	-0.164358	-0.193683	0.0330574	-0.00151505	0.0631435	0.0293255	0.811749	0.0273649	0.643791	0.0305804
560	-0.178361	-0.174697	-0.158155	-0.173069	-0.18964	0.0112787	0.0149429	0.0314851	0.0165705	0.698345	0.0388377	0.435649	0.0236233
562	-0.19183	-0.174239	-0.156591	-0.137665	-0.212605	0.0207757	0.0383665	0.056015	0.0749402	0.747797	0.0551663	0.596923	0.0554606
564	-0.186081	-0.186812	-0.171328	-0.171695	-0.217897	0.0318159	0.0310848	0.0465681	0.0462016	0.805285	0.0500902	0.534814	0.0397853
566	-0.250742	-0.233474	-0.215977	-0.201164	-0.27356	0.0228179	0.0400868	0.0575838	0.0723968	0.758431	0.0563655	0.607238	0.0540733
568	-0.265595	-0.261618	-0.247111	-0.254042	-0.301746	0.036151	0.0401282	0.0546351	0.0477043	0.827858	0.0563943	0.587851	0.040605
570	-0.312684	-0.30807	-0.28867	-0.26878	-0.315287	0.0026027	0.00721669	0.0266173	0.0465068	0.653169	0.0334517	0.403645	0.0399518
572	-0.317417	-0.305429	-0.274943	-0.272462	-0.34815	0.0307329	0.0427211	0.0732068	0.0756885	0.799645	0.0582018	0.709953	0.0558687
574	-0.326865	-0.312294	-0.298524	-0.301372	-0.340847	0.0139817	0.0285527	0.0423225	0.039475	0.712421	0.0483251	0.5069	0.0361164
576	-0.310166	-0.312782	-0.290299	-0.283421	-0.341749	0.0315832	0.0289674	0.0514504	0.0583287	0.804073	0.0486141	0.566913	0.0464
578	-0.344593	-0.322572	-0.317093	-0.318002	-0.361205	0.0166119	0.0386327	0.0441124	0.043203	0.726116	0.0553518	0.518668	0.0381498
580	-0.321429	-0.301405	-0.282867	-0.281151	-0.334517	0.0130873	0.0331116	0.0516492	0.0533658	0.707763	0.0515031	0.56822	0.043693
582	-0.309812	-0.30798	-0.283152	-0.276812	-0.311854	0.00204292	0.00387484	0.0287027	0.0350425	0.650254	0.0311221	0.417356	0.0336987
584	-0.291752	-0.292243	-0.267482	-0.259453	-0.32005	0.0282985	0.0278068	0.0525681	0.0605971	0.786969	0.0478051	0.574262	0.0476373
586	-0.251912	-0.270042	-0.257636	-0.254541	-0.278759	0.0268469	0.0087164	0.021123	0.0242179	0.779411	0.0344972	0.367522	0.0277946
588	-0.276748	-0.270735	-0.251219	-0.245058	-0.301983	0.0252355	0.0312483	0.0507644	0.0569255	0.77102	0.0502042	0.562402	0.0456346
590	-0.298177	-0.299345	-0.277203	-0.268087	-0.314081	0.015904	0.0147361	0.036878	0.045994	0.72243	0.0386936	0.471105	0.0396721
592	-0.291785	-0.304089	-0.26911	-0.281877	-0.311583	0.0197973	0.00749364	0.0424728	0.0297057	0.742703	0.0336448	0.507889	0.0307878
594	-0.337796	-0.338506	-0.305295	-0.310649	-0.355426	0.0176303	0.0169205	0.0501311	0.0447773	0.731419	0.0402163	0.558239	0.0390085
596	-0.374294	-0.358444	-0.345896	-0.350252	-0.380565	0.00627097	0.0221202	0.0346684	0.0303126	0.67227	0.043841	0.456578	0.0311188
598	-0.37164	-0.392708	-0.345404	-0.36437	-0.39588	0.0242405	0.00317252	0.0504757	0.0315096	0.765839	0.0306326	0.560505	0.0317717
600	-0.412306	-0.411909	-0.387559	-0.398005	-0.420852	0.00854596	0.00894326	0.0332931	0.0228475	0.684116	0.0346553	0.447536	0.027047
602	-0.430208	-0.440739	-0.419339	-0.40958	-0.457341	0.0271324	0.0166017	0.0380018	0.0477602	0.780897	0.039994	0.478494	0.0406355
604	-0.431431	-0.446489	-0.415329	-0.421643	-0.44469	0.0132587	-0.00179914	0.0293615	0.0230474	0.708656	0.0271668	0.421687	0.0271561
606	-0.435229	-0.45334	-0.415396	-0.437734	-0.461413	0.0261842	0.00807258	0.0460166	0.0236787	0.77596	0.0340484	0.531188	0.0275004
608	-0.429042	-0.433676	-0.413859	-0.445883	-0.472815	0.0437727	0.039139	0.0589556	0.0269321	0.867544	0.0557048	0.616257	0.029275
610	-0.395748	-0.4366	-0.398775	-0.414073	-0.444545	0.0487972	0.007945	0.0457702	0.0304717	0.893707	0.0339594	0.529568	0.0312056
612	-0.359761	-0.389473	-0.379802	-0.378641	-0.392671	0.0329106	0.00319782	0.0128689	0.01403	0.810985	0.0306502	0.313255	0.0222376
614	-0.335907	-0.368516	-0.324679	-0.351355	-0.367291	0.0313835	-0.00122535	0.0426119	0.0159361	0.803033	0.0275668	0.508803	0.0232773
616	-0.316356	-0.301868	-0.300718	-0.310832	-0.3237	0.0073435	0.0218318	0.0229816	0.0128678	0.677855	0.0436399	0.379742	0.0216037
618	-0.285808	-0.302892	-0.283096	-0.273885	-0.309484	0.023676	0.00659215	0.0263885	0.0355989	0.7629	0.0330164	0.402141	0.0340022
620	-0.280682	-0.310261	-0.290282	-0.307757	-0.281027	0.000344992	-0.0292345	-0.00925472	-0.02673	0.641413	0.00804162	0.1678	5.45441e-06
622	-0.2514	-0.273091	-0.243809	-0.272365	-0.288244	0.0368436	0.0151524	0.0444351	0.015879	0.831464	0.0389837	0.52079	0.0232462
624	-0.208315	-0.257674	-0.213324	-0.226174	-0.266931	0.0586156	0.00925636	0.0536064	0.0407564	0.944833	0.0348736	0.581088	0.0368153
626	-0.20138	-0.208609	-0.194747	-0.216034	-0.234155	0.0327749	0.0255453	0.0394076	0.0181205	0.810278	0.0462286	0.487737	0.0244688
628	-0.177747	-0.200477	-0.158046	-0.18576	-0.199753	0.0220064	-0.000723138	0.041707	0.0139933	0.754206	0.0279169	0.502854	0.0222176
630	-0.186498	-0.143247	-0.147008	-0.128702	-0.149289	-0.0372091	0.00604112	0.00228047	0.020587	0.445866	0.0326323	0.24364	0.0258141
632	-0.108856	-0.133693	-0.108946	-0.10069	-0.128851	0.0199942	-0.00484245	0.0199049	0.0281605	0.743728	0.0250453	0.359513	0.029945
634	-0.0945008	-0.128563	-0.102579	-0.120965	-0.130776	0.0362747	0.00221279	0.0281966	0.00981033	0.828502	0.0299635	0.414029	0.0199361
636	-0.0810463	-0.10353	-0.0876715	-0.10544	-0.130775	0.0497284	0.0272451	0.0431032	0.0253342	0.898556	0.0474136	0.512033	0.0284034
638	-0.0984756	-0.140317	-0.115811	-0.118945	-0.130116	0.0316404	-0.0102008	0.0143046	0.0111708	0.804371	0.02131	0.322694	0.0206781
640	-0.0848546	-0.150589	-0.109556	-0.117825	-0.109829	0.0249743	-0.0407603	0.000273064	-0.00799619	0.76966	6.971e-06	0.230442	0.0102236
642	-0.108962	-0.141711	-0.120089	-0.129219	-0.121556	0.0125941	-0.0201555	0.00146655	-0.00766341	0.705195	0.0143706	0.238289	0.0104052
644	-0.117812	-0.160275	-0.0980615	-0.140245	-0.181002	0.0631892	0.0207266	0.0829401	0.0407568	0.968648	0.0428695	0.773945	0.0368155
646	-0.0998096	-0.151377	-0.103162	-0.142588	-0.122302	0.0224919	-0.0290759	0.0191397	-0.0202868	0.756734	0.00815221	0.354483	0.00351984
648	-0.107648	-0.148514	-0.103992	-0.133511	-0.171565	0.0639167	0.023051	0.0675728	0.0380541	0.972436	0.0444899	0.672912	0.0353413
650	-0.144803	-0.171242	-0.150134	-0.163274	-0.177099	0.0322958	0.00585762	0.0269647	0.0138247	0.807783	0.0325043	0.405929	0.0221257
652	-0.760704	-0.735813	-0.725112	-0.724836	-0.78067	0.0199659	0.0448565	0.0555581	0.0558341	0.743581	0.0596904	0.593919	0.0450393
654	-0.519786	-0.511477	-0.494741	-0.498035	-0.523022	0.00323653	0.0115457	0.0282816	0.0249871	0.656469	0.0364695	0.414587	0.0282141
656	-0.376824	-0.373175	-0.360614	-0.367162	-0.391449	0.0146245	0.0182742	0.0308346	0.0242871	0.715767	0.04116	0.431372	0.0278323
658	-0.277539	-0.267669	-0.258009	-0.256511	-0.290033	0.0124946	0.0223641	0.0320238	0.0335225	0.704677	0.044011	0.439191	0.0328697
660	-0.0836253	-0.155056	-0.128504	-0.138617	-0.147211	0.063586	-0.00784469	0.0187069	0.00859462	0.970714	0.0229525	0.351638	0.019273
662	-0.12542	-0.182596	-0.152283	-0.185327	-0.183943	0.0585233	0.00134729	0.0316603	-0.00138375	0.944352	0.0293602	0.436801	0.0138303
664	-0.246883	-0.297267	-0.265036	-0.266873	-0.25882	0.0119365	-0.0384472	-0.00621644	-0.008053	0.701771	0.00161942	0.187776	0.0101927
666	-0.281029	-0.293229	-0.297774	-0.30342	-0.313428	0.0323994	0.0201998	0.0156547	0.0100085	0.808323	0.0425023	0.33157	0.0200442
668	-0.288885	-0.303649	-0.292242	-0.312916	-0.296459	0.00757441	-0.00718975	0.00421709	-0.016457	0.679057	0.023409	0.256372	0.00560876
670	-0.272819	-0.302572	-0.27612	-0.307762	-0.315362	0.0425434	0.0127899	0.0392419	0.00759992	0.861144	0.0373369	0.486646	0.0187304
672	-0.273458	-0.30055	-0.274898	-0.290183	-0.309329	0.0358713	0.00877929	0.0344307	0.0191464	0.826401	0.034541	0.455015	0.0250283
674	-0.268551	-0.294149	-0.258344	-0.269947	-0.303428	0.0348768	0.00927818	0.0450839	0.0334809	0.821223	0.0348888	0.525055	0.032847
676	-0.264479	-0.284401	-0.260375	-0.270717	-0.30848	0.0440012	0.0240788	0.0481048	0.0377628	0.868734	0.0452063	0.544917	0.0351825
678	-0.241498	-0.270154	-0.260268	-0.274606	-0.307404	0.0659068	0.0372506	0.0471364	0.0327986	0.982799	0.0543884	0.53855	0.0324748
680	-0.276886	-0.284351	-0.259034	-0.273127	-0.269333	-0.00755289	-0.015018	0.0102993	-0.00379393	0.600288	0.017952	0.296361	0.0125157
682	-0.288483	-0.262392	-0.254745	-0.264811	-0.27443	-0.014053	0.0120385	0.0196849	0.00961906	0.566442	0.036813	0.358067	0.0198317
684	-0.250022	-0.293097	-0.264748	-0.281584	-0.288232	0.0382096	-0.00486517	0.0234838	0.00664726	0.838577	0.0250295	0.383043	0.0182108
686	-0.262531	-0.298295	-0.26783	-0.278759	-0.287654	0.0251229	-0.010641	0.0198244	0.00889564	0.770433	0.0210031	0.358985	0.0194371
688	-0.275342	-0.294909	-0.274391	-0.300548	-0.322159	0.046817	0.02725	0.0477679	0.0216114	0.883396	0.047417	0.542702	0.0263729
690	-0.301969	-0.292831	-0.273956	-0.30051	-0.319943	0.0179741	0.0271118	0.0459872	0.0194328	0.733209	0.0473206	0.530995	0.0251846
692	-0.284741	-0.327041	-0.292374	-0.297776	-0.325063	0.0403217	-0.00197813	0.0326885	0.0272868	0.849575	0.027042	0.443561	0.0294685
694	-0.312249	-0.336094	-0.324593	-0.346745	-0.347716	0.0354668	0.0116211	0.0231225	0.000970095	0.824295	0.0365221	0.380668	0.0151142
696	-0.34873	-0.352489	-0.328225	-0.347437	-0.359566	0.0108359	0.00707665	0.0313408	0.0121288	0.69604	0.0333541	0.4347	0.0212007
698	-0.344724	-0.361853	-0.3482	-0.362447	-0.397951	0.0532271	0.0360981	0.0497511	0.0355044	0.916774	0.053585	0.555741	0.0339506
700	-0.378466	-0.385278	-0.357366	-0.367677	-0.419003	0.040537	0.0337251	0.0616374	0.0513268	0.850696	0.0519308	0.633889	0.0425809
702	-0.400694	-0.406144	-0.393836	-0.407207	-0.432422	0.0317284	0.0262784	0.0385863	0.0252148	0.804829	0.0467397	0.482337	0.0283383
704	-0.437779	-0.444936	-0.421093	-0.432141	-0.448961	0.0111818	0.00402549	0.0278686	0.0168205	0.697841	0.0312272	0.411872	0.0237597
706	-0.45322	-0.485967	-0.451543	-0.484243	-0.484825	0.0316046	-0.0011422	0.0332816	0.000582069	0.804184	0.0276248	0.44746	0.0149026
708	-0.508997	-0.521287	-0.503715	-0.507608	-0.534657	0.0256599	0.0133702	0.0309418	0.0270485	0.77323	0.0377413	0.432077	0.0293384
710	-0.550031	-0.579116	-0.541133	-0.562607	-0.60361	0.0535789	0.0244938	0.0624768	0.041003	0.918606	0.0454956	0.639407	0.0369498
712	-0.619505	-0.641232	-0.624855	-0.630554	-0.663623	0.0441185	0.0223911	0.0387688	0.0330697	0.869345	0.0440298	0.483536	0.0326227
714	-0.689121	-0.734128	-0.703013	-0.722558	-0.739187	0.0500655	0.005059	0.036174	0.0166292	0.900312	0.0319476	0.466477	0.0236554
716	-0.790713	-0.817486	-0.789412	-0.81069	-0.840532	0.0498189	0.0230451	0.0511193	0.0298421	0.899027	0.0444857	0.564736	0.0308622
718	-0.888937	-0.935087	-0.906459	-0.914682	-0.955101	0.0661635	0.0200133	0.0486415	0.0404185	0.984135	0.0423723	0.548446	0.036631
720	-1.00051	-1.03161	-1.01765	-1.03872	-1.0338	0.0332848	0.00218844	0.0161459	-0.00492239	0.812933	0.0299466	0.3348	0.0119002
722	-1.13312	-1.15011	-1.13685	-1.14079	-1.16389	0.0307671	0.0137789	0.0270339	0.0230968	0.799823	0.0380263	0.406384	0.027183
724	-1.22415	-1.25576	-1.23093	-1.24845	-1.27982	0.055678	0.0240602	0.048896	0.0313725	0.929536	0.0451934	0.550118	0.031697
726	-1.35621	-1.38948	-1.35646	-1.36932	-1.38912	0.0329107	-0.000361323	0.0326627	0.0198042	0.810985	0.0281691	0.443391	0.0253871
728	-1.49181	-1.52877	-1.50685	-1.52012	-1.54196	0.0501478	0.0131867	0.0351123	0.0218372	0.90074	0.0376134	0.459496	0.026496
730	-1.67004	-1.69425	-1.68668	-1.69942	-1.72232	0.0522783	0.0280739	0.0356435	0.0229006	0.911834	0.0479913	0.462988	0.027076
732	-1.8631	-1.89604	-1.86327	-1.90456	-1.91084	0.0477344	0.0148008	0.0475645	0.00627792	0.888173	0.0387386	0.541365	0.0180093
734	-2.0622	-2.0706	-2.03938	-2.05139	-2.08657	0.0243692	0.0159674	0.0471878	0.0351808	0.766509	0.0395518	0.538888	0.0337742
736	-2.15954	-2.19284	-2.16717	-2.18523	-2.20907	0.0495265	0.0162246	0.0418997	0.0238402	0.897505	0.0397312	0.504121	0.0275885
738	-2.18651	-2.24461	-2.20817	-2.24487	-2.2286	0.0420992	-0.0160079	0.0204339	-0.0162673	0.858831	0.0172619	0.362992	0.00571224
740	-2.16726	-2.21499	-2.18152	-2.20887	-2.22043	0.0531688	0.00543618	0.038908	0.0115557	0.916471	0.0322106	0.484452	0.020888
742	-2.11012	-2.15307	-2.12462	-2.13798	-2.16039	0.0502653	0.00731373	0.0357697	0.0224059	0.901352	0.0335194	0.463818	0.0268062
744	-2.0254	-2.05179	-2.02651	-2.05458	-2.06203	0.0366228	0.0102382	0.0355136	0.00744677	0.830314	0.035558	0.462135	0.0186469
746	-1.93374	-1.96018	-1.92869	-1.94771	-1.96908	0.0353402	0.00890231	0.0403929	0.0213728	0.823636	0.0346268	0.494214	0.0262427
748	-1.8627	-1.86451	-1.84879	-1.85089	-1.88062	0.017916	0.016111	0.0318294	0.0297326	0.732906	0.039652	0.437912	0.0308025
750	-1.7635	-1.80575	-1.76947	-1.78183	-1.80006	0.0365518	-0.00569427	0.0305877	0.0182294	0.829945	0.0244515	0.429749	0.0245281
752	-1.71104	-1.74998	-1.73413	-1.73734	-1.76176	0.0507126	0.0117742	0.0276277	0.0244188	0.903681	0.0366288	0.410288	0.0279041
754	-1.69324	-1.72166	-1.70203	-1.71948	-1.72739	0.0341462	0.00572395	0.0253603	0.00790644	0.817418	0.0324112	0.395381	0.0188976
756	-1.69006	-1.71081	-1.69574	-1.72735	-1.72415	0.0340927	0.0133404	0.0284153	-0.00319505	0.81714	0.0377206	0.415466	0.0128424
758	-1.72364	-1.73147	-1.6932	-1.70753	-1.74903	0.0253867	0.0175585	0.0558237	0.0414932	0.771807	0.040661	0.595666	0.0372172
760	-1.72448	-1.75419	-1.7156	-1.73889	-1.76454	0.0400605	0.0103571	0.0489415	0.0256562	0.848215	0.035641	0.550418	0.0285791
762	-1.75656	-1.77959	-1.75492	-1.76678	-1.79913	0.0425746	0.0195403	0.0442096	0.0323498	0.861306	0.0420425	0.519308	0.03223
764	-1.7845	-1.80534	-1.78078	-1.80695	-1.83362	0.0491174	0.0282747	0.0528333	0.0266707	0.895375	0.0481313	0.576005	0.0291324
766	-1.83604	-1.83396	-1.8252	-1.83372	-1.85243	0.0163939	0.018474	0.0272371	0.0187131	0.724981	0.0412992	0.40772	0.024792
768	-1.81902	-1.84959	-1.81787	-1.84324	-1.86788	0.0488646	0.0182915	0.0500193	0.024649	0.894058	0.041172	0.557504	0.0280297
770	-1.80911	-1.85753	-1.82073	-1.83428	-1.83715	0.0280359	-0.0203846	0.0164151	0.00287414	0.785602	0.0142109	0.33657	0.0161528
772	-1.77226	-1.81249	-1.79436	-1.80943	-1.83289	0.0606376	0.0204041	0.038536	0.0234637	0.955361	0.0426447	0.482005	0.0273832
774	-1.73589	-1.77484	-1.75255	-1.77386	-1.76837	0.0324858	-0.0064683	0.0158234	-0.0054915	0.808773	0.0239119	0.332679	0.0115898
776	-1.68607	-1.7213	-1.69189	-1.71289	-1.7207	0.0346233	-0.000608563	0.0288011	0.00781035	0.819903	0.0279968	0.418003	0.0188452
778	-1.63996	-1.65237	-1.64008	-1.66671	-1.68133	0.0413682	0.028963	0.0412551	0.0146217	0.855024	0.0486111	0.499883	0.0225604
780	-1.57234	-1.57777	-1.56252	-1.5829	-1.58644	0.0141076	0.00867867	0.0239253	0.00354838	0.713076	0.0344709	0.385946	0.0165205
782	-1.46436	-1.48856	-1.47331	-1.50012	-1.51424	0.0498812	0.0256763	0.0409245	0.0141134	0.899352	0.0463199	0.49771	0.0222831
784	-1.39535	-1.4064	-1.37897	-1.39633	-1.42103	0.0256839	0.0146331	0.042061	0.024701	0.773355	0.0386217	0.505181	0.028058
786	-1.28053	-1.30268	-1.28094	-1.29866	-1.31163	0.0310956	0.0089519	0.0306942	0.0129687	0.801534	0.0346614	0.430449	0.0216587
788	-1.18398	-1.20475	-1.18477	-1.19054	-1.21403	0.0300555	0.00928485	0.0292653	0.0234965	0.796118	0.0348935	0.421054	0.0274011
790	-1.07276	-1.10185	-1.0753	-1.10423	-1.10573	0.0329745	0.0038811	0.0304296	0.00150585	0.811317	0.0311265	0.428709	0.0154064
792	-0.976688	-0.984161	-0.982154	-0.983039	-1.004	0.0273131	0.0198404	0.0218471	0.0209621	0.781838	0.0422517	0.372283	0.0260187
794	-0.864238	-0.887499	-0.856406	-0.871116	-0.891321	0.0270825	0.00382185	0.0349143	0.0202043	0.780637	0.0310852	0.458195	0.0256054
796	-0.738813	-0.763981	-0.743783	-0.766603	-0.783001	0.0441879	0.0190207	0.0392179	0.0163985	0.869706	0.0416803	0.486489	0.0235295
798	-0.636511	-0.637169	-0.644379	-0.635413	-0.66449	0.0279785	0.0273203	0.0201104	0.0290771	0.785303	0.047466	0.360865	0.0304449
800	-0.528655	-0.565046	-0.519036	-0.549464	-0.570826	0.0421716	0.0057804	0.0517902	0.0213624	0.859207	0.0324505	0.569147	0.026237
Trend Analysis, 500-570 nm
	Absorption					log relative absorption
nm	Acacia 800 VOC	Acacia 500 VOC	Euc 800 VOC	Euc 500 VOC	logRWL	Acacia 800 VOC	Acacia 500 VOC	Euc 800 VOC	Euc 500 VOC
500	0.73385	0.0395983	0.452505	0.0411232	2.69897	-0.134392	-1.40232	-0.344376	-1.38591
502	0.591166	0.0203301	0.279034	0.0214901	2.7007	-0.22829	-1.69186	-0.554343	-1.66776
504	1.00005	0.0699638	0.714612	0.0701405	2.70243	2.26135e-05	-1.15513	-0.14593	-1.15403
506	0.802157	0.0528571	0.412205	0.0333872	2.70415	-0.0957409	-1.2769	-0.384887	-1.47642
508	0.900749	0.0525403	0.454059	0.0342137	2.70586	-0.0453961	-1.27951	-0.342888	-1.4658
510	0.655823	0.046819	0.369999	0.0243	2.70757	-0.183213	-1.32958	-0.4318	-1.61439
512	0.642254	0.0503808	0.536545	0.0412272	2.70927	-0.192293	-1.29774	-0.270394	-1.38482
514	0.702055	0.0223334	0.281657	0.021636	2.71096	-0.153629	-1.65105	-0.550279	-1.66482
516	0.741293	0.0420714	0.322188	0.032543	2.71265	-0.13001	-1.37601	-0.49189	-1.48754
518	0.894635	0.0564228	0.655293	0.0444714	2.71433	-0.048354	-1.24855	-0.183565	-1.35192
520	0.811458	0.0505924	0.534986	0.0186877	2.716	-0.090734	-1.29591	-0.271658	-1.72844
522	0.707956	0.0539696	0.429723	0.0244925	2.71767	-0.149994	-1.26785	-0.366811	-1.61097
524	0.81353	0.0568798	0.415686	0.0455522	2.71933	-0.0896264	-1.24504	-0.381235	-1.34149
526	0.783556	0.0559286	0.4487	0.0386206	2.72099	-0.10593	-1.25237	-0.348044	-1.41318
528	0.636058	0.0596365	0.608146	0.0511247	2.72263	-0.196503	-1.22449	-0.215992	-1.29137
530	0.753812	0.0341454	0.506645	0.0333194	2.72428	-0.122737	-1.46667	-0.295296	-1.4773
532	0.837086	0.0582806	0.623454	0.0446256	2.72591	-0.0772297	-1.23448	-0.205195	-1.35042
534	0.701315	0.0467275	0.43573	0.0321267	2.72754	-0.154087	-1.33043	-0.360782	-1.49313
536	0.67633	0.0518372	0.417972	0.0352274	2.72916	-0.169841	-1.28536	-0.378853	-1.45312
538	0.888083	0.0672151	0.65786	0.0511278	2.73078	-0.0515467	-1.17253	-0.181867	-1.29134
540	0.856719	0.0437765	0.688794	0.0396811	2.73239	-0.0671617	-1.35876	-0.16191	-1.40142
542	0.788885	0.0555263	0.524773	0.0335293	2.734	-0.102986	-1.2555	-0.280029	-1.47458
544	0.799583	0.0585788	0.660549	0.0475598	2.7356	-0.0971367	-1.23226	-0.180095	-1.32276
546	0.858405	0.031046	0.413405	0.0476322	2.73719	-0.0663077	-1.50799	-0.383625	-1.3221
548	0.84618	0.0526807	0.370221	0.037523	2.73878	-0.0725371	-1.27835	-0.431539	-1.4257
550	0.77532	0.0340835	0.411778	0.0341338	2.74036	-0.110519	-1.46746	-0.385337	-1.46682
552	0.753484	0.048172	0.560165	0.0341751	2.74194	-0.122926	-1.31721	-0.251684	-1.46629
554	0.731722	0.0459506	0.470016	0.0360702	2.74351	-0.135654	-1.33771	-0.327888	-1.44285
556	0.7606	0.0409054	0.519797	0.0539349	2.74507	-0.118844	-1.38822	-0.284166	-1.26813
558	0.811749	0.0273649	0.643791	0.0305804	2.74663	-0.0905781	-1.56281	-0.191255	-1.51456
560	0.698345	0.0388377	0.435649	0.0236233	2.74819	-0.15593	-1.41075	-0.360864	-1.62666
562	0.747797	0.0551663	0.596923	0.0554606	2.74974	-0.126216	-1.25833	-0.224082	-1.25602
564	0.805285	0.0500902	0.534814	0.0397853	2.75128	-0.0940506	-1.30025	-0.271798	-1.40028
566	0.758431	0.0563655	0.607238	0.0540733	2.75282	-0.120084	-1.24899	-0.216641	-1.26702
568	0.827858	0.0563943	0.587851	0.040605	2.75435	-0.0820443	-1.24876	-0.230733	-1.39142
570	0.653169	0.0334517	0.403645	0.0399518	2.75587	-0.184974	-1.47558	-0.394001	-1.39846
Slope:	4.32571e-05	-2.15419e-05	0.00145033	0.000102641	AAE:	-0.134962	-0.117266	-1.88156	-1.87038
Slope SD:	0.000704693	9.51982e-05	0.00091003	8.82247e-05	AAE SD:	0.489965	1.24516	1.00656	1.24996

## Sheet: UV-Vis 500C Fresh
Fresh Burns at 500 deg C
	Raw Integrated					Blank Subtracted				Normalized
nm	Acacia	Olive	VM	Eucalyptus	blank	Acacia	Olive	VM	Eucalyptus	Acacia	Olive	VM	Eucalyptus
200	352.441	389.434	349.181	368.646	349.346	3.09415	40.0881	-0.165436	19.2991	1.03669	3.07365	-0.0500187	2.13971
202	267.287	305.294	265.109	284.664	263.491	3.79599	41.8029	1.61844	21.1736	1.27189	3.2049	0.490921	2.3476
204	200.652	237.695	198.91	218.016	195.676	4.97644	42.0191	3.2341	22.34	1.66747	3.22144	0.980852	2.47697
206	149.61	185.259	148.769	167.421	143.822	5.78818	41.4367	4.94659	23.5994	1.9395	3.17687	1.50015	2.61664
208	116.522	150.946	116.67	134.449	110.404	6.11823	40.5418	6.26557	24.0446	2.0501	3.10838	1.90011	2.66602
210	97.9577	130.231	98.6571	115.212	91.3187	6.63902	38.9118	7.33837	23.8933	2.22463	2.98362	2.22543	2.64924
212	87.4371	117.725	88.3192	103.869	80.2373	7.19975	37.4874	8.08188	23.6312	2.41254	2.8746	2.45089	2.62017
214	80.413	109.252	81.5718	96.3751	73.2635	7.14951	35.9887	8.30827	23.1116	2.3957	2.7599	2.51954	2.56254
216	74.8485	102.081	76.0472	90.0822	67.7018	7.14677	34.3789	8.34541	22.3804	2.39479	2.63669	2.5308	2.48145
218	69.5698	95.4625	70.7076	84.3026	62.5252	7.04461	32.9372	8.18232	21.7773	2.36055	2.52635	2.48134	2.41456
220	64.1503	88.7627	65.2221	78.2676	57.1079	7.04248	31.6549	8.11427	21.1597	2.35984	2.42821	2.46071	2.34607
222	58.1254	81.4226	59.0138	71.5106	51.2958	6.82957	30.1268	7.71801	20.2149	2.28849	2.31125	2.34055	2.24127
224	51.7321	73.1949	52.3288	64.1899	45.0112	6.7209	28.1837	7.31757	19.1787	2.25207	2.16254	2.21912	2.12636
226	44.7924	65.1439	45.3447	56.8396	38.4987	6.29364	26.6452	6.84592	18.3408	2.10889	2.04479	2.07609	2.03343
228	38.1766	57.0363	38.5383	49.4048	32.163	6.01353	24.8733	6.37526	17.2418	2.01502	1.90917	1.93337	1.91154
230	31.9654	49.362	32.246	42.4476	26.3346	5.63076	23.0274	5.91139	16.113	1.88675	1.7679	1.79271	1.78635
232	26.3499	42.3463	26.4968	36.0638	21.0302	5.31969	21.3161	5.46662	15.0337	1.7825	1.63692	1.65784	1.66664
234	21.371	36.1815	21.5658	30.4205	16.5321	4.83887	19.6494	5.03371	13.8884	1.62137	1.50936	1.52656	1.53962
236	17.1964	30.881	17.3912	25.5496	12.7115	4.48491	18.1696	4.67977	12.8381	1.50276	1.3961	1.41924	1.42314
238	13.7058	26.4118	13.9239	21.4938	9.57929	4.12653	16.8325	4.3446	11.9145	1.38266	1.29377	1.3176	1.3207
240	10.9805	22.8863	11.2518	18.2445	7.13892	3.8416	15.7474	4.11293	11.1056	1.28717	1.21071	1.24735	1.23099
242	8.77348	20.0335	9.09009	15.687	5.25918	3.5143	14.7744	3.83092	10.4278	1.17749	1.13624	1.16183	1.15582
244	7.09637	17.8395	7.38524	13.5959	3.74128	3.35509	14.0982	3.64396	9.85464	1.12413	1.08449	1.10514	1.09225
246	5.74949	16.1556	6.06874	12.0858	2.59855	3.15094	13.5571	3.47019	9.48729	1.05572	1.04308	1.05244	1.05151
248	4.77891	14.8689	5.12508	10.8646	1.69834	3.08057	13.1705	3.42674	9.16628	1.03214	1.01349	1.03927	1.01591
250	4.07025	14.0798	4.38283	10.1084	1.08558	2.98467	12.9943	3.29725	9.02285	1	1	1	1
252	3.5601	13.4902	3.90412	9.4979	0.672157	2.88795	12.8181	3.23196	8.82575	0.96759	0.986516	0.980204	0.978141
254	3.22847	13.0861	3.5373	9.05664	0.386714	2.84175	12.6994	3.15059	8.66992	0.95211	0.977429	0.955529	0.960859
256	2.9207	12.8429	3.18475	8.75731	0.145491	2.77521	12.6974	3.03926	8.61181	0.929811	0.977283	0.92177	0.954415
258	2.70699	12.6431	2.87684	8.50991	-0.108177	2.81516	12.7512	2.98501	8.61809	0.943199	0.9814	0.905319	0.95511
260	2.60624	12.4575	2.65454	8.26324	-0.268588	2.87482	12.7261	2.92313	8.53183	0.963192	0.979474	0.886555	0.945543
262	2.36922	12.368	2.46989	8.17677	-0.407481	2.7767	12.7755	2.87737	8.58425	0.930309	0.983258	0.872678	0.951358
264	2.2788	12.3115	2.31508	8.04818	-0.454601	2.7334	12.7661	2.76968	8.50278	0.915798	0.98254	0.840021	0.942322
266	2.2035	12.2113	2.18208	7.94458	-0.597462	2.80097	12.8088	2.77954	8.54204	0.938441	0.985806	0.843013	0.946677
268	2.09494	12.1277	2.05961	7.82212	-0.641513	2.73646	12.7692	2.70113	8.46364	0.916822	0.982778	0.819234	0.93798
270	2.03068	12.1058	1.93038	7.76315	-0.71226	2.74294	12.818	2.64264	8.47541	0.918995	0.986513	0.8015	0.939286
272	1.93016	12.0251	1.82738	7.62329	-0.763805	2.69396	12.7889	2.59119	8.38709	0.902583	0.984284	0.785897	0.929492
274	1.8475	11.9367	1.69049	7.50605	-0.890401	2.7379	12.8271	2.58089	8.39645	0.917308	0.987205	0.782774	0.93053
276	1.73602	11.7343	1.53714	7.31638	-0.964645	2.70067	12.6989	2.50178	8.28102	0.904829	0.977396	0.758785	0.917727
278	1.64196	11.6026	1.44341	7.13801	-1.01699	2.65895	12.6196	2.4604	8.155	0.890849	0.971325	0.746238	0.90375
280	1.53428	11.273	1.34914	6.89295	-1.09274	2.62702	12.3657	2.44189	7.98569	0.88015	0.951892	0.740622	0.884973
282	1.36913	11.0408	1.15858	6.7325	-1.20004	2.56917	12.2408	2.35862	7.93255	0.860764	0.942334	0.715373	0.879079
284	1.2955	10.8038	1.0596	6.51466	-1.19567	2.49117	11.9995	2.25528	7.71033	0.834625	0.923862	0.684035	0.854434
286	1.11087	10.3606	0.951328	6.24381	-1.25462	2.36548	11.6152	2.20594	7.49843	0.792503	0.894452	0.669075	0.830932
288	1.04815	9.97529	0.856162	5.9942	-1.31825	2.36639	11.2935	2.17441	7.31245	0.792809	0.869834	0.659512	0.810306
290	0.869377	9.53312	0.764363	5.72706	-1.31963	2.18901	10.8528	2.084	7.04669	0.733365	0.836098	0.632096	0.780831
292	0.765169	9.13731	0.628834	5.54206	-1.34298	2.10815	10.4803	1.97182	6.88504	0.706268	0.807591	0.598079	0.762903
294	0.696624	8.73087	0.562736	5.34681	-1.41572	2.11234	10.1466	1.97846	6.76253	0.707673	0.782051	0.600092	0.749316
296	0.658323	8.26223	0.496456	5.10741	-1.42668	2.08501	9.68891	1.92314	6.53409	0.698512	0.747022	0.583318	0.723981
298	0.53135	7.90253	0.379939	4.92012	-1.45032	1.98167	9.35285	1.83026	6.37044	0.663884	0.721302	0.555154	0.705831
300	0.435415	7.57235	0.311737	4.77947	-1.48485	1.92027	9.0572	1.79659	6.26433	0.643307	0.698674	0.544944	0.694062
302	0.411893	7.21874	0.267201	4.54082	-1.4416	1.8535	8.66034	1.70881	5.98242	0.62093	0.6683	0.518324	0.662796
304	0.365293	6.85964	0.189049	4.37399	-1.45215	1.81745	8.31179	1.6412	5.82614	0.608849	0.641623	0.497823	0.645464
306	0.295964	6.51594	0.115154	4.20562	-1.47552	1.77149	7.99146	1.59067	5.68114	0.593447	0.617106	0.482502	0.629382
308	0.245428	6.21091	0.0885214	4.03275	-1.50825	1.75367	7.71915	1.59677	5.541	0.587478	0.596265	0.484349	0.613839
310	0.165806	5.91822	0.0572398	3.88496	-1.4726	1.63841	7.39082	1.52984	5.35757	0.548851	0.571136	0.464055	0.593496
312	0.135833	5.6043	-0.024773	3.66336	-1.50511	1.64094	7.10941	1.48033	5.16847	0.549699	0.549598	0.449042	0.572523
314	0.0786268	5.3008	-0.0782097	3.52084	-1.52143	1.60006	6.82223	1.44322	5.04227	0.535999	0.527618	0.437789	0.558527
316	0.091229	4.98926	-0.160148	3.26704	-1.45734	1.54857	6.4466	1.2972	4.72439	0.518746	0.498869	0.393508	0.523271
318	-0.0742128	4.79196	-0.231832	3.20835	-1.51948	1.44527	6.31145	1.28765	4.72783	0.484128	0.488525	0.390614	0.523654
320	-0.151688	4.56844	-0.308946	3.00328	-1.57266	1.42097	6.1411	1.26371	4.57594	0.475984	0.475487	0.383354	0.506808
322	-0.165068	4.30377	-0.342763	2.84947	-1.58622	1.42115	5.88999	1.24345	4.43569	0.476044	0.456268	0.377211	0.491252
324	-0.259181	4.06872	-0.490091	2.68818	-1.59444	1.33526	5.66316	1.10435	4.28262	0.447262	0.438908	0.33503	0.474277
326	-0.319864	3.83343	-0.442883	2.49229	-1.597	1.27714	5.43043	1.15412	4.0893	0.427784	0.421095	0.350122	0.452835
328	-0.384814	3.62354	-0.54642	2.36994	-1.62953	1.24472	5.25307	1.08311	3.99947	0.416918	0.407521	0.328589	0.442873
330	-0.470021	3.43275	-0.601331	2.21033	-1.61539	1.14536	5.04814	1.01405	3.82571	0.383625	0.391836	0.307648	0.423602
332	-0.518962	3.14477	-0.710034	2.02394	-1.63265	1.11369	4.77743	0.92262	3.65659	0.37301	0.371117	0.279922	0.404846
334	-0.587592	2.89505	-0.742124	1.87977	-1.67897	1.09138	4.57402	0.936846	3.55874	0.365533	0.355549	0.284236	0.393993
336	-0.71837	2.73112	-0.729363	1.76002	-1.71358	0.995209	4.4447	0.984217	3.4736	0.333305	0.345652	0.298601	0.38455
338	-0.714987	2.56204	-0.820738	1.55887	-1.69778	0.982793	4.25982	0.877042	3.25665	0.329144	0.331502	0.266101	0.360489
340	-0.730356	2.39543	-0.82602	1.4367	-1.67763	0.947275	4.07306	0.851612	3.11433	0.317242	0.317208	0.258389	0.344705
342	-0.801324	2.14501	-0.870221	1.32016	-1.6897	0.888379	3.83472	0.819482	3.00986	0.297505	0.298966	0.248646	0.333119
344	-0.822251	1.9874	-0.928971	1.19319	-1.65058	0.828329	3.63798	0.72161	2.84377	0.277381	0.283909	0.218968	0.314697
346	-0.849205	1.86685	-0.980287	1.09163	-1.70253	0.853324	3.56938	0.722242	2.79416	0.285757	0.278658	0.21916	0.309195
348	-0.883163	1.74155	-0.991945	0.992458	-1.67701	0.793847	3.41856	0.685065	2.66947	0.265826	0.267115	0.207886	0.295367
350	-0.931938	1.58482	-0.975543	0.871738	-1.66382	0.731885	3.24865	0.68828	2.53556	0.245062	0.254111	0.208861	0.280515
352	-0.881348	1.44561	-0.990693	0.737821	-1.64336	0.762017	3.08897	0.652672	2.38119	0.255159	0.24189	0.198063	0.263394
354	-0.950269	1.29008	-1.00228	0.678236	-1.65442	0.70415	2.9445	0.652135	2.33265	0.235767	0.230833	0.1979	0.258011
356	-1.0359	1.25009	-1.08525	0.677284	-1.66264	0.626739	2.91273	0.577386	2.33992	0.209825	0.228401	0.175234	0.258818
358	-0.958601	1.06658	-1.01691	0.536879	-1.63528	0.67668	2.70187	0.618368	2.17216	0.226561	0.212262	0.187661	0.240211
360	-1.00193	0.939432	-1.03565	0.444064	-1.67297	0.671035	2.6124	0.637314	2.11703	0.22467	0.205415	0.193406	0.234097
362	-1.01227	0.886125	-1.07833	0.335922	-1.57517	0.562897	2.46129	0.496831	1.91109	0.188431	0.19385	0.150806	0.211257
364	-1.04221	0.754776	-1.07703	0.274436	-1.58507	0.542857	2.33985	0.508036	1.85951	0.181715	0.184555	0.154204	0.205536
366	-1.02223	0.617129	-1.11538	0.189847	-1.58762	0.565397	2.20475	0.472241	1.77747	0.189269	0.174215	0.14335	0.196438
368	-1.0646	0.518037	-1.08062	0.125813	-1.57583	0.511223	2.09386	0.495208	1.70164	0.171114	0.165728	0.150314	0.188027
370	-1.04993	0.434349	-1.09885	0.0624091	-1.53874	0.488811	1.97309	0.439888	1.60115	0.163604	0.156485	0.133539	0.176882
372	-1.00944	0.320579	-1.11107	-0.035789	-1.61873	0.609287	1.93931	0.507657	1.58294	0.203977	0.153899	0.154089	0.174863
374	-1.11766	0.203815	-1.1378	-0.144022	-1.57906	0.461394	1.78287	0.441259	1.43504	0.154416	0.141926	0.133955	0.158459
376	-1.18453	0.164287	-1.15076	-0.181801	-1.62835	0.443824	1.79264	0.477592	1.44655	0.148528	0.142674	0.144972	0.159736
378	-1.11334	0.0138859	-1.19966	-0.286376	-1.56766	0.454318	1.58154	0.367998	1.28128	0.152044	0.126517	0.111739	0.141407
380	-1.112	-0.034748	-1.21904	-0.271391	-1.60052	0.488517	1.56577	0.381479	1.32912	0.163505	0.12531	0.115827	0.146713
382	-1.16531	-0.129334	-1.18879	-0.3991	-1.55827	0.392964	1.42894	0.36948	1.15917	0.131484	0.114837	0.112189	0.127864
384	-1.13635	-0.182643	-1.25078	-0.531348	-1.56264	0.426289	1.37999	0.31186	1.03129	0.142652	0.111091	0.0947159	0.113681
386	-1.22553	-0.262751	-1.22839	-0.534266	-1.62461	0.399081	1.36186	0.396223	1.09035	0.133534	0.109704	0.120298	0.120231
388	-1.24461	-0.298043	-1.26279	-0.555666	-1.53472	0.290114	1.23668	0.27193	0.979055	0.0970175	0.100123	0.0826075	0.107888
390	-1.22204	-0.419151	-1.2668	-0.643663	-1.61387	0.391832	1.19472	0.347065	0.970204	0.131105	0.0969112	0.105391	0.106906
392	-1.28044	-0.391907	-1.2446	-0.613951	-1.57996	0.299524	1.18806	0.335368	0.966014	0.100171	0.0964015	0.101844	0.106441
394	-1.2602	-0.502802	-1.27867	-0.738353	-1.59387	0.333668	1.09107	0.315197	0.855518	0.111613	0.0889784	0.0957277	0.0941867
396	-1.2435	-0.537919	-1.23394	-0.766623	-1.51459	0.271089	0.976672	0.280648	0.747968	0.0906418	0.0802229	0.0852512	0.0822586
398	-1.23488	-0.629426	-1.25727	-0.756008	-1.58384	0.348962	0.954411	0.326571	0.82783	0.116738	0.0785191	0.0991769	0.0911158
400	-1.29653	-0.612565	-1.28984	-0.849899	-1.51213	0.215594	0.899562	0.222289	0.662228	0.0720448	0.0743212	0.0675544	0.0727495
402	-1.2825	-0.733182	-1.2522	-0.872643	-1.61169	0.329198	0.878513	0.359492	0.739052	0.110115	0.0727102	0.10916	0.0812697
404	-1.262	-0.75045	-1.33287	-0.885243	-1.61306	0.351054	0.862607	0.280186	0.727814	0.117439	0.0714928	0.0851112	0.0800234
406	-1.26757	-0.796557	-1.33021	-0.922494	-1.63932	0.371749	0.842758	0.309104	0.716821	0.124375	0.0699737	0.0938801	0.0788042
408	-1.34582	-0.782625	-1.31107	-0.92051	-1.5824	0.236583	0.799776	0.271335	0.66189	0.0790785	0.066684	0.0824273	0.072712
410	-1.3023	-0.803026	-1.32489	-0.965557	-1.56237	0.260071	0.759349	0.237481	0.596818	0.0869496	0.0635898	0.0721613	0.065495
412	-1.39585	-0.783906	-1.38519	-0.946508	-1.58529	0.189444	0.801383	0.200104	0.638782	0.0632813	0.066807	0.0608272	0.0701491
414	-1.28628	-0.851274	-1.37512	-0.971031	-1.57538	0.289099	0.724103	0.200257	0.604346	0.0966771	0.0608923	0.0608734	0.0663299
416	-1.348	-0.918797	-1.29444	-1.02101	-1.53869	0.190692	0.619896	0.244253	0.517684	0.0636995	0.0529168	0.0742149	0.0567185
418	-1.38108	-0.973934	-1.36932	-1.0578	-1.59668	0.215601	0.622751	0.22736	0.538882	0.0720472	0.0531353	0.0690922	0.0590695
420	-1.33098	-0.948273	-1.36007	-1.04144	-1.51218	0.181199	0.563904	0.15211	0.470742	0.0605183	0.0486313	0.0462735	0.0515122
422	-1.23622	-0.955756	-1.30868	-1.06058	-1.49782	0.261599	0.542064	0.189137	0.43724	0.0874616	0.0469598	0.0575014	0.0477967
424	-1.29889	-0.924842	-1.32596	-0.997828	-1.47357	0.174681	0.548729	0.14761	0.475742	0.0583341	0.0474699	0.0449089	0.0520668
426	-1.31749	-0.949362	-1.28873	-1.0379	-1.52989	0.212402	0.580528	0.241158	0.491987	0.0709751	0.0499037	0.0732762	0.0538685
428	-1.26829	-0.966097	-1.30948	-1.00559	-1.4919	0.223605	0.525802	0.182422	0.486308	0.0747292	0.0457151	0.0554653	0.0532386
430	-1.31319	-0.963074	-1.29673	-1.0275	-1.45028	0.137094	0.487209	0.153549	0.42278	0.045738	0.0427614	0.0467099	0.0461929
432	-1.27608	-0.976802	-1.28905	-1.00044	-1.47028	0.194207	0.49348	0.18123	0.469845	0.0648775	0.0432414	0.0551039	0.0514127
434	-1.2615	-0.990968	-1.25057	-1.0273	-1.4631	0.201596	0.472127	0.21253	0.435792	0.0673539	0.0416071	0.0645952	0.0476361
436	-1.2531	-0.968882	-1.25175	-1.06091	-1.44009	0.186983	0.471203	0.188339	0.379171	0.0624568	0.0415364	0.0572596	0.0413564
438	-1.29097	-1.04081	-1.30062	-1.04848	-1.46899	0.17802	0.428179	0.168366	0.420505	0.0594531	0.0382435	0.0512031	0.0459406
440	-1.30741	-1.05175	-1.2921	-1.08644	-1.44127	0.133861	0.389526	0.149176	0.354838	0.0446547	0.0352852	0.0453839	0.0386578
442	-1.23139	-1.1004	-1.26247	-1.14984	-1.41727	0.185873	0.316865	0.154791	0.267427	0.0620847	0.029724	0.0470866	0.0289632
444	-1.29809	-1.05524	-1.31018	-1.08047	-1.47739	0.179307	0.42215	0.16721	0.396918	0.0598843	0.037782	0.0508523	0.0433246
446	-1.32864	-1.01938	-1.31159	-1.06666	-1.4348	0.106159	0.415417	0.123211	0.368138	0.0353715	0.0372667	0.0375102	0.0401328
448	-1.28045	-1.02725	-1.27861	-1.05499	-1.41375	0.133302	0.386508	0.135149	0.358762	0.0444673	0.0350541	0.0411303	0.0390929
450	-1.25195	-1.07372	-1.31719	-1.05901	-1.41566	0.163709	0.341935	0.0984695	0.356643	0.0546574	0.0316427	0.0300076	0.0388579
452	-1.28402	-1.06892	-1.28596	-1.05389	-1.42036	0.136341	0.351442	0.134407	0.366471	0.0454858	0.0323703	0.0409052	0.0399479
454	-1.25869	-1.08382	-1.27147	-1.07482	-1.43568	0.176988	0.351853	0.164204	0.360856	0.0591071	0.0324018	0.0499408	0.0393252
456	-1.27504	-1.09618	-1.30545	-1.07759	-1.4539	0.178862	0.357719	0.148453	0.376314	0.0597351	0.0328508	0.0451645	0.0410395
458	-1.23265	-1.04409	-1.32336	-1.07982	-1.4204	0.187752	0.376312	0.0970383	0.340578	0.0627144	0.0342738	0.0295736	0.0370762
460	-1.25508	-1.0963	-1.26262	-1.10649	-1.40953	0.154448	0.313224	0.146902	0.303033	0.0515537	0.0294453	0.0446943	0.0329122
462	-1.2768	-1.08754	-1.27884	-1.06549	-1.41022	0.133425	0.322677	0.131382	0.344732	0.0445087	0.0301688	0.0399878	0.0375369
464	-1.26035	-1.09478	-1.2582	-1.07513	-1.39932	0.138969	0.304533	0.141114	0.324186	0.0463666	0.0287801	0.0429392	0.0352582
466	-1.25978	-1.05286	-1.25727	-1.03771	-1.34085	0.0810636	0.287989	0.0835732	0.30314	0.0269616	0.0275139	0.0254905	0.0329241
468	-1.2022	-1.08819	-1.24222	-1.05279	-1.3483	0.146096	0.260111	0.106084	0.295511	0.048755	0.0253803	0.0323167	0.0320779
470	-1.17125	-1.0764	-1.24324	-1.07538	-1.26344	0.0921946	0.187044	0.0202003	0.188058	0.0306917	0.019788	0.00627334	0.0201606
472	-1.29051	-1.05972	-1.21356	-1.02746	-1.34842	0.0579119	0.288701	0.134865	0.320964	0.0192031	0.0275684	0.0410442	0.0349008
474	-1.26115	-1.09853	-1.24306	-1.09534	-1.34767	0.0865215	0.24914	0.104608	0.252335	0.0287906	0.0245405	0.031869	0.0272894
476	-1.24342	-1.17323	-1.28867	-1.11189	-1.37684	0.13342	0.203607	0.0881722	0.264953	0.0445069	0.0210557	0.0268851	0.0286888
478	-1.22133	-1.07935	-1.24735	-1.07533	-1.34823	0.126908	0.268882	0.100885	0.272909	0.0423247	0.0260515	0.0307402	0.0295712
480	-1.23899	-1.07897	-1.24397	-1.064	-1.35318	0.114197	0.274216	0.109208	0.289179	0.0380649	0.0264598	0.0332638	0.0313757
482	-1.33852	-1.16316	-1.32942	-1.14726	-1.4026	0.0640793	0.239439	0.0731771	0.255335	0.0212698	0.0237981	0.022338	0.0276221
484	-1.29401	-1.10758	-1.33187	-1.10468	-1.39304	0.0990342	0.285456	0.0611696	0.288359	0.0329838	0.02732	0.0186968	0.0312848
486	-1.21203	-1.02181	-1.21002	-1.03942	-1.29972	0.0876888	0.277907	0.0897044	0.260304	0.0291817	0.0267423	0.0273497	0.0281732
488	-1.19441	-1.0489	-1.23829	-1.0057	-1.34199	0.147583	0.293087	0.1037	0.336294	0.0492531	0.0279041	0.0315937	0.0366011
490	-1.13744	-1.00428	-1.1408	-0.975801	-1.28805	0.15061	0.283766	0.147253	0.312249	0.0502675	0.0271907	0.0448006	0.0339343
492	-1.1764	-1.07339	-1.20313	-1.0063	-1.28455	0.108151	0.211161	0.0814209	0.278253	0.036039	0.0216338	0.0248378	0.0301639
494	-1.2092	-1.14355	-1.29303	-1.10156	-1.3276	0.118393	0.184046	0.034566	0.226038	0.039471	0.0195585	0.0106296	0.0243729
496	-1.27387	-1.15983	-1.28941	-1.10935	-1.33692	0.0630504	0.177086	0.0475076	0.227574	0.0209251	0.0190258	0.014554	0.0245432
498	-1.24726	-1.14994	-1.29078	-1.11254	-1.36354	0.116286	0.213598	0.0727664	0.251005	0.0387652	0.0218203	0.0222134	0.0271419
500	-1.28008	-1.14366	-1.28525	-1.12632	-1.34693	0.0668491	0.203274	0.0616827	0.220611	0.0221981	0.0210301	0.0188524	0.023771
502	-1.21349	-1.15168	-1.26728	-1.09533	-1.33029	0.116804	0.178607	0.0630161	0.234958	0.0389387	0.0191422	0.0192568	0.0253622
504	-1.25307	-1.1656	-1.25423	-1.14666	-1.36482	0.111755	0.199216	0.110594	0.218162	0.0372465	0.0207196	0.0336841	0.0234993
506	-1.26865	-1.14291	-1.26387	-1.13934	-1.36505	0.0963953	0.222141	0.101182	0.225707	0.0320994	0.0224742	0.0308302	0.0243361
508	-1.25355	-1.17422	-1.28178	-1.1612	-1.34398	0.090426	0.169751	0.0621917	0.182773	0.030099	0.0184644	0.0190068	0.0195745
510	-1.23237	-1.18989	-1.28497	-1.13116	-1.33496	0.102586	0.145069	0.0499842	0.203799	0.0341739	0.0165754	0.015305	0.0219064
512	-1.27344	-1.18477	-1.2837	-1.1662	-1.36093	0.0874882	0.176162	0.0772264	0.194724	0.0291145	0.0189551	0.0235659	0.0209
514	-1.27544	-1.2158	-1.28253	-1.15653	-1.33385	0.0584135	0.118059	0.0513263	0.177328	0.0193712	0.0145081	0.015712	0.0189706
516	-1.2374	-1.18306	-1.28248	-1.12925	-1.34055	0.103147	0.157485	0.0580688	0.211299	0.034362	0.0175257	0.0177565	0.0227382
518	-1.26652	-1.18158	-1.26155	-1.15418	-1.32839	0.0618654	0.146805	0.066837	0.174206	0.020528	0.0167083	0.0204154	0.0186243
520	-1.21209	-1.23685	-1.24069	-1.16424	-1.31027	0.098175	0.0734206	0.069576	0.146026	0.0326958	0.0110917	0.021246	0.015499
522	-1.25754	-1.19152	-1.25542	-1.15927	-1.2931	0.0355589	0.101578	0.0376732	0.133828	0.0117123	0.0132468	0.0115718	0.0141461
524	-1.23466	-1.18786	-1.25773	-1.1492	-1.30285	0.068195	0.114995	0.0451218	0.153654	0.0226491	0.0142737	0.0138305	0.016345
526	-1.21837	-1.18623	-1.22083	-1.15816	-1.28847	0.0701017	0.102242	0.0676353	0.130312	0.0232881	0.0132976	0.0206575	0.0137562
528	-1.21252	-1.19746	-1.21975	-1.14273	-1.29188	0.0793593	0.0944211	0.0721372	0.149151	0.0263904	0.012699	0.0220226	0.0158456
530	-1.17744	-1.2571	-1.22438	-1.17463	-1.2858	0.108369	0.028704	0.0614233	0.111175	0.0361118	0.0076693	0.0187738	0.0116338
532	-1.20497	-1.19244	-1.24106	-1.13485	-1.26904	0.0640736	0.0765992	0.0279806	0.134195	0.0212679	0.011335	0.00863264	0.0141869
534	-1.21665	-1.20876	-1.2177	-1.13849	-1.2715	0.0548502	0.0627482	0.0538098	0.133019	0.0181771	0.0102749	0.016465	0.0140564
536	-1.19179	-1.22525	-1.22436	-1.11451	-1.26921	0.0774193	0.043961	0.0448585	0.154707	0.0257403	0.008837	0.0137507	0.0164617
538	-1.18833	-1.19088	-1.23311	-1.15794	-1.27379	0.0854622	0.082911	0.040678	0.115844	0.0284356	0.0118181	0.012483	0.0121516
540	-1.20381	-1.20372	-1.19644	-1.13211	-1.26195	0.058141	0.0582266	0.0655097	0.129845	0.0192798	0.00992883	0.0200129	0.0137044
542	-1.19977	-1.22074	-1.21312	-1.1394	-1.25911	0.0593419	0.0383769	0.0459962	0.119713	0.0196823	0.00840962	0.0140957	0.0125806
544	-1.19334	-1.19847	-1.21685	-1.1535	-1.26283	0.0694938	0.0643567	0.0459831	0.109334	0.0230843	0.010398	0.0140917	0.0114295
546	-1.18513	-1.18479	-1.19677	-1.13462	-1.2286	0.0434692	0.0438033	0.0318297	0.0939778	0.0143631	0.00882493	0.00979985	0.00972647
548	-1.19745	-1.19878	-1.21473	-1.13052	-1.24592	0.0484645	0.0471332	0.0311872	0.115395	0.0160371	0.00907979	0.009605	0.0121018
550	-1.204	-1.18808	-1.1974	-1.10761	-1.27777	0.0737675	0.0896909	0.0803666	0.170166	0.0245165	0.012337	0.0245181	0.0181763
552	-1.19201	-1.2086	-1.19472	-1.14263	-1.23687	0.0448655	0.0282769	0.0421537	0.094246	0.014831	0.0076366	0.0129305	0.00975622
554	-1.16197	-1.20341	-1.21033	-1.15694	-1.22968	0.0677044	0.0262681	0.019352	0.0727335	0.0224847	0.00748286	0.00601611	0.00737033
556	-1.17976	-1.20881	-1.19584	-1.15857	-1.23038	0.0506258	0.021569	0.0345426	0.0718175	0.0167614	0.00712321	0.0106225	0.00726874
558	-1.18708	-1.21261	-1.21303	-1.13715	-1.22404	0.0369591	0.0114236	0.011004	0.0868843	0.0121815	0.00634672	0.00348467	0.00893974
560	-1.19435	-1.18954	-1.18407	-1.15421	-1.22168	0.0273317	0.032144	0.0376109	0.0674711	0.0089552	0.00793257	0.0115529	0.00678669
562	-1.18348	-1.21367	-1.20036	-1.16846	-1.25618	0.0726985	0.0425069	0.0558181	0.0877205	0.0241583	0.00872571	0.017074	0.00903249
564	-1.2018	-1.24879	-1.19572	-1.19952	-1.26409	0.0622884	0.0153021	0.0683731	0.064577	0.0206697	0.00664356	0.0208812	0.00646571
566	-1.22325	-1.24738	-1.23673	-1.21522	-1.27988	0.0566359	0.0325037	0.0431558	0.0646609	0.0187754	0.00796011	0.0132344	0.00647502
568	-1.25227	-1.27354	-1.26217	-1.19642	-1.29002	0.0377541	0.0164841	0.0278537	0.0936019	0.0124479	0.00673403	0.00859417	0.00968478
570	-1.25705	-1.30964	-1.2691	-1.23477	-1.31647	0.0594168	0.00683153	0.0473673	0.0816975	0.0197074	0.00599526	0.0145115	0.00836449
572	-1.27317	-1.29873	-1.29248	-1.23645	-1.3301	0.056936	0.0313697	0.0376202	0.0936546	0.018876	0.00787331	0.0115557	0.00969063
574	-1.28029	-1.29617	-1.28888	-1.24624	-1.31995	0.0396649	0.0237802	0.0310695	0.0737188	0.0130882	0.00729245	0.00956932	0.0074796
576	-1.25925	-1.27946	-1.2607	-1.21523	-1.29698	0.0377293	0.0175191	0.036283	0.0817559	0.0124396	0.00681325	0.0111503	0.00837097
578	-1.26753	-1.32182	-1.2942	-1.23154	-1.33729	0.0697594	0.0154717	0.0430906	0.105749	0.0231733	0.00665654	0.0132146	0.011032
580	-1.23962	-1.2941	-1.24206	-1.20524	-1.30009	0.0604688	0.00598681	0.0580205	0.0948477	0.0200599	0.00593061	0.0177419	0.00982294
582	-1.25078	-1.29636	-1.24562	-1.21466	-1.30851	0.0577283	0.0121543	0.0628867	0.0938544	0.0191415	0.00640265	0.0192175	0.00971278
584	-1.24354	-1.26995	-1.24177	-1.20245	-1.29042	0.0468888	0.0204777	0.0486494	0.087976	0.0155091	0.00703968	0.0149002	0.00906082
586	-1.21992	-1.26988	-1.2371	-1.19198	-1.27718	0.0572554	0.00729823	0.0400758	0.0852019	0.0189831	0.00603098	0.0123004	0.00875315
588	-1.24529	-1.26513	-1.25297	-1.21177	-1.29325	0.0479606	0.0281265	0.0402849	0.0814782	0.0158683	0.00762509	0.0123638	0.00834018
590	-1.26508	-1.32255	-1.28491	-1.26228	-1.31702	0.0519482	-0.0055232	0.0321177	0.0547407	0.0172045	0.00504968	0.00988718	0.00537479
592	-1.27266	-1.31251	-1.27713	-1.2558	-1.32436	0.0517085	0.011856	0.0472294	0.0685638	0.0171242	0.00637981	0.0144696	0.00690788
594	-1.29019	-1.35598	-1.30329	-1.27158	-1.35744	0.0672462	0.00146174	0.0541487	0.0858589	0.0223311	0.00558428	0.0165678	0.00882603
596	-1.33144	-1.39339	-1.35095	-1.32615	-1.3963	0.0648602	0.0029099	0.0453469	0.0701452	0.0215316	0.00569512	0.0138988	0.00708327
598	-1.33646	-1.42455	-1.35641	-1.34776	-1.40194	0.065486	-0.022604	0.0455335	0.0541823	0.0217412	0.00374239	0.0139554	0.00531286
600	-1.38921	-1.4095	-1.39243	-1.35439	-1.42618	0.0369692	0.0166796	0.0337509	0.0717903	0.0121849	0.006749	0.0103824	0.00726572
602	-1.42709	-1.44466	-1.41027	-1.3944	-1.46438	0.0372807	0.0197148	0.0541039	0.0699754	0.0122892	0.0069813	0.0165542	0.00706443
604	-1.41597	-1.46477	-1.42983	-1.39855	-1.46736	0.051387	0.00258958	0.0375314	0.0688056	0.0170165	0.0056706	0.0115288	0.00693469
606	-1.41637	-1.45927	-1.44893	-1.40082	-1.4679	0.0515386	0.0086354	0.0189762	0.0670863	0.0170673	0.00613332	0.00590217	0.00674401
608	-1.42687	-1.4577	-1.44979	-1.39326	-1.47167	0.0448016	0.0139689	0.0218796	0.0784065	0.0148096	0.00654153	0.00678257	0.00799949
610	-1.39891	-1.46289	-1.43223	-1.38877	-1.45349	0.054577	-0.00940657	0.0212575	0.0647162	0.0180855	0.00475246	0.00659395	0.00648115
612	-1.38339	-1.43812	-1.40198	-1.37443	-1.44686	0.0634692	0.00874019	0.0448784	0.0724314	0.0210654	0.00614134	0.0137567	0.00733682
614	-1.39901	-1.43707	-1.38822	-1.36304	-1.43381	0.0347983	-0.00326097	0.0455946	0.0707762	0.0114573	0.00522282	0.0139739	0.00715325
616	-1.35325	-1.39547	-1.36801	-1.33025	-1.40658	0.0533231	0.011109	0.0385647	0.0763309	0.0176653	0.00632264	0.0118421	0.0077693
618	-1.30832	-1.37857	-1.31289	-1.31542	-1.35395	0.0456216	-0.0246205	0.0410519	0.0385257	0.0150844	0.00358805	0.0125964	0.00357644
620	-1.30312	-1.37176	-1.32582	-1.31022	-1.36382	0.0607005	-0.00793374	0.0380007	0.0535998	0.0201376	0.00486519	0.0116711	0.00524827
622	-1.33415	-1.36515	-1.34309	-1.30438	-1.36428	0.0301321	-0.000871181	0.0211942	0.0599005	0.00989363	0.00540573	0.00657475	0.00594706
624	-1.28128	-1.33575	-1.32017	-1.27734	-1.34795	0.0666727	0.0122082	0.0277828	0.07061	0.0221389	0.00640677	0.00857266	0.00713482
626	-1.28015	-1.32904	-1.26815	-1.2646	-1.3197	0.0395432	-0.00933981	0.0515487	0.0550914	0.0130474	0.00475757	0.0157794	0.00541369
628	-1.25868	-1.30996	-1.28534	-1.23828	-1.32449	0.0658019	0.014527	0.0391411	0.0862037	0.0218471	0.00658424	0.0120169	0.00886426
630	-1.24816	-1.28726	-1.24906	-1.22999	-1.27702	0.0288609	-0.0102406	0.0279638	0.047031	0.00946766	0.00468863	0.00862754	0.00451974
632	-1.18043	-1.28555	-1.20558	-1.20777	-1.21405	0.0336255	-0.0714911	0.00847018	0.00628853	0.0110643	7.65359e-07	0.00271633	1.10907e-06
634	-1.21071	-1.24029	-1.20572	-1.18922	-1.24205	0.0313433	0.00176835	0.0363352	0.0528294	0.0102996	0.00560775	0.0111661	0.00516282
636	-1.18901	-1.21977	-1.19169	-1.13375	-1.2142	0.0251957	-0.00556219	0.0225101	0.0804514	0.00823939	0.0050467	0.00697376	0.00822629
638	-1.18516	-1.22812	-1.18923	-1.18645	-1.2311	0.0459391	0.00298405	0.0418683	0.0446484	0.0151908	0.00570079	0.0128439	0.00425549
640	-1.19537	-1.25105	-1.18457	-1.17891	-1.2351	0.039727	-0.0159519	0.0505238	0.0561843	0.013109	0.00425151	0.0154686	0.0055349
642	-1.21149	-1.2735	-1.23011	-1.18406	-1.23085	0.0193522	-0.0426577	0.000740528	0.0467833	0.00628114	0.00220756	0.000372402	0.00449227
644	-1.2152	-1.27638	-1.23363	-1.20772	-1.254	0.0387952	-0.0223793	0.0203636	0.0462786	0.0127968	0.00375959	0.00632287	0.00443629
646	-1.17996	-1.24272	-1.20492	-1.1798	-1.21228	0.0323216	-0.0304379	0.00736558	0.0324885	0.0106274	0.00314281	0.00238137	0.00290687
648	-1.23633	-1.30443	-1.25076	-1.21795	-1.27893	0.0425994	-0.0254966	0.0281667	0.0609759	0.0140716	0.003521	0.00868906	0.00606632
650	-1.2767	-1.34212	-1.27306	-1.27952	-1.31015	0.0334409	-0.0319707	0.0370802	0.0306234	0.0110025	0.00302549	0.011392	0.00270002
652	-1.5996	-1.63544	-1.59899	-1.56445	-1.6266	0.0269976	-0.00883675	0.0276037	0.0621521	0.00884322	0.00479608	0.00851837	0.00619678
654	-1.41007	-1.45572	-1.40724	-1.39336	-1.43432	0.0242543	-0.0214025	0.0270803	0.0409665	0.00792392	0.00383435	0.00835964	0.00384714
656	-1.30966	-1.37165	-1.31302	-1.30573	-1.34287	0.0332143	-0.0287753	0.0298593	0.0371451	0.0109265	0.00327006	0.00920234	0.00342332
658	-1.33299	-1.39137	-1.34804	-1.33219	-1.36054	0.0275459	-0.0308297	0.0124965	0.0283484	0.00902698	0.00311283	0.00393726	0.00244771
660	-1.21514	-1.28582	-1.21937	-1.21803	-1.27776	0.0626167	-0.00806129	0.0583869	0.0597245	0.0207797	0.00485543	0.017853	0.00592753
662	-1.29681	-1.36321	-1.29758	-1.28957	-1.35257	0.0557601	-0.0106324	0.0549933	0.0629989	0.018482	0.00465864	0.0168239	0.00629069
664	-1.35866	-1.4388	-1.39692	-1.36893	-1.42623	0.0675728	-0.0125744	0.029309	0.057303	0.0224406	0.00451001	0.00903548	0.00565897
666	-1.41866	-1.46764	-1.40941	-1.41457	-1.44836	0.0296918	-0.0192854	0.0389432	0.0337868	0.0097461	0.00399638	0.0119569	0.00305086
668	-1.41026	-1.47537	-1.43744	-1.40911	-1.4582	0.0479348	-0.0171673	0.0207559	0.0490905	0.0158596	0.00415849	0.00644183	0.00474815
670	-1.42314	-1.47133	-1.42404	-1.40665	-1.46448	0.0413404	-0.00685394	0.0404416	0.0578326	0.0136497	0.00494783	0.0124113	0.00571771
672	-1.40413	-1.47306	-1.42799	-1.40495	-1.44558	0.0414474	-0.0274768	0.0175909	0.0406282	0.0136856	0.00336944	0.00548208	0.00380962
674	-1.40031	-1.47611	-1.43038	-1.4015	-1.4299	0.0295916	-0.0462048	-0.000477552	0.0283974	0.0097125	0.00193608	3.03239e-06	0.00245314
676	-1.38623	-1.45518	-1.40919	-1.38505	-1.43488	0.0486492	-0.0203007	0.025694	0.0498295	0.016099	0.00391867	0.00793926	0.00483011
678	-1.3967	-1.45833	-1.38138	-1.4074	-1.42891	0.032204	-0.0294198	0.0475315	0.0215044	0.010588	0.00322073	0.0145612	0.00168866
680	-1.39557	-1.45555	-1.39911	-1.37015	-1.43635	0.0407742	-0.0192065	0.0372356	0.0661941	0.01346	0.00400242	0.0114391	0.00664505
682	-1.39682	-1.45175	-1.40581	-1.38882	-1.44251	0.0456868	-0.00923526	0.0367013	0.0536948	0.0151063	0.00476558	0.0112771	0.0052588
684	-1.38492	-1.48847	-1.39819	-1.42846	-1.437	0.0520735	-0.0514766	0.0388083	0.00854015	0.0172465	0.0015326	0.011916	0.00025083
686	-1.41138	-1.46798	-1.41853	-1.39547	-1.44564	0.0342597	-0.022344	0.0271108	0.0501674	0.0112769	0.00376229	0.00836889	0.00486759
688	-1.43402	-1.49128	-1.42075	-1.40534	-1.45518	0.0211617	-0.0360959	0.0344253	0.0498391	0.00688753	0.00270977	0.0105869	0.00483118
690	-1.41871	-1.50021	-1.4335	-1.42108	-1.45905	0.0403402	-0.0411606	0.0255491	0.0379726	0.0133145	0.00232214	0.00789531	0.00351509
692	-1.45035	-1.50942	-1.45948	-1.45966	-1.49294	0.0425925	-0.0164752	0.0334653	0.0332847	0.0140693	0.00421146	0.0102958	0.00299517
694	-1.4807	-1.54603	-1.48239	-1.46858	-1.50577	0.0250723	-0.0402561	0.0233853	0.0371962	0.00819805	0.00239136	0.00723917	0.00342898
696	-1.48328	-1.54871	-1.49544	-1.47478	-1.52409	0.0408188	-0.0246131	0.0286592	0.0493137	0.0134749	0.00358861	0.00883843	0.0047729
698	-1.50667	-1.59195	-1.50917	-1.51472	-1.54388	0.0372107	-0.0480682	0.0347116	0.0291618	0.0122658	0.00179346	0.0106737	0.00253792
700	-1.55781	-1.60232	-1.53322	-1.51472	-1.58219	0.0243757	-0.0201331	0.0489634	0.0674697	0.00796459	0.0039315	0.0149955	0.00678653
702	-1.57244	-1.62162	-1.574	-1.54823	-1.60073	0.0282904	-0.0208955	0.0267256	0.0525011	0.00927646	0.00387315	0.0082521	0.00512641
704	-1.58623	-1.65929	-1.59882	-1.58594	-1.62881	0.0425811	-0.030486	0.0299865	0.0428667	0.0140655	0.00313913	0.00924091	0.00405789
706	-1.64136	-1.70456	-1.63995	-1.64016	-1.66692	0.0255567	-0.0376369	0.0269741	0.026764	0.00836036	0.00259183	0.00832743	0.00227199
708	-1.67005	-1.7383	-1.69297	-1.65979	-1.71415	0.0441015	-0.0241466	0.0211873	0.0543636	0.014575	0.00362433	0.00657266	0.00533297
710	-1.73985	-1.79649	-1.74682	-1.73419	-1.77104	0.0311873	-0.0254529	0.024218	0.0368422	0.0102473	0.00352435	0.00749167	0.00338973
712	-1.81892	-1.86822	-1.82203	-1.78628	-1.84281	0.0238838	-0.0254078	0.0207835	0.0565252	0.00779976	0.0035278	0.00645022	0.00557271
714	-1.92037	-1.97346	-1.9022	-1.89686	-1.9344	0.0140316	-0.0390537	0.0322043	0.0375414	0.00449815	0.0024834	0.00991343	0.00346727
716	-2.01979	-2.07331	-2.00175	-1.99292	-2.04107	0.021282	-0.0322332	0.0393226	0.048155	0.00692783	0.0030054	0.012072	0.00464439
718	-2.12045	-2.16836	-2.11448	-2.10134	-2.15291	0.0324612	-0.0154459	0.0384352	0.0515723	0.0106742	0.00429023	0.0118029	0.0050234
720	-2.21946	-2.27514	-2.23503	-2.21634	-2.2516	0.0321391	-0.0235467	0.0165641	0.0352557	0.0105662	0.00367024	0.00517073	0.00321377
722	-2.34219	-2.39075	-2.34548	-2.32493	-2.38984	0.0476537	-0.000905752	0.0443628	0.0649095	0.0157654	0.00540308	0.0136004	0.00650258
724	-2.44168	-2.50024	-2.45232	-2.4392	-2.4762	0.0345144	-0.0240414	0.0238769	0.036999	0.0113622	0.00363237	0.00738825	0.00340712
726	-2.56959	-2.61977	-2.58274	-2.55793	-2.60016	0.030566	-0.0196152	0.0174186	0.0422277	0.010039	0.00397114	0.00542985	0.00398702
728	-2.73654	-2.77332	-2.72328	-2.71821	-2.75762	0.0210795	-0.0157044	0.034332	0.0394025	0.00686	0.00427045	0.0105586	0.00367368
730	-2.901	-2.9626	-2.89858	-2.89888	-2.92456	0.0235615	-0.0380356	0.0259826	0.0256782	0.00769174	0.00256131	0.00802678	0.00215156
732	-3.09908	-3.16245	-3.10509	-3.09551	-3.13655	0.0374746	-0.025902	0.0314636	0.0410385	0.0123542	0.00348997	0.00968883	0.00385513
734	-3.26303	-3.33033	-3.28115	-3.2661	-3.31514	0.0521073	-0.0151935	0.0339923	0.0490396	0.0172579	0.00430956	0.0104556	0.0047425
736	-3.37509	-3.43428	-3.38369	-3.38665	-3.40412	0.0290322	-0.03016	0.0204258	0.0174716	0.00952507	0.00316408	0.00634174	0.00124139
738	-3.41224	-3.46156	-3.408	-3.40357	-3.43102	0.0187809	-0.0305436	0.0230162	0.0274482	0.00608971	0.00313472	0.00712725	0.00234786
740	-3.3886	-3.41783	-3.36687	-3.35263	-3.39112	0.00251198	-0.0267124	0.0242455	0.0384841	0.000637738	0.00342794	0.00750002	0.00357182
742	-3.29463	-3.341	-3.30586	-3.2925	-3.33496	0.0403297	-0.00604129	0.0290961	0.0424573	0.013311	0.00501003	0.00897092	0.00401249
744	-3.18962	-3.24841	-3.1998	-3.19361	-3.22288	0.0332623	-0.0255313	0.0230865	0.0292728	0.0109426	0.00351834	0.00714858	0.00255023
746	-3.09856	-3.16081	-3.09642	-3.10061	-3.11762	0.019058	-0.0431921	0.0211954	0.0170076	0.00618255	0.00216665	0.00657511	0.00118993
748	-3.01695	-3.06852	-3.02866	-3.00017	-3.04665	0.0297036	-0.0218647	0.0179975	0.046488	0.00975006	0.00379897	0.00560538	0.00445952
750	-2.9258	-3.01083	-2.93613	-2.94758	-2.97442	0.0486193	-0.0364077	0.0382886	0.0268419	0.016089	0.00268591	0.0117584	0.00228062
752	-2.87969	-2.94137	-2.89742	-2.89685	-2.91656	0.036869	-0.0248048	0.0191422	0.0197124	0.0121513	0.00357394	0.00595249	0.00148992
754	-2.88428	-2.91858	-2.88974	-2.85706	-2.91165	0.0273747	-0.00692701	0.0219169	0.0545893	0.00896962	0.00494224	0.00679389	0.005358
756	-2.88121	-2.93657	-2.8758	-2.86598	-2.90455	0.0233407	-0.0320222	0.0287459	0.0385637	0.00761775	0.00302155	0.00886471	0.00358066
758	-2.89097	-2.95536	-2.89812	-2.88182	-2.90597	0.014997	-0.0493879	0.00785518	0.0241561	0.00482165	0.00169245	0.00252984	0.00198275
760	-2.92591	-2.97615	-2.92672	-2.90488	-2.95342	0.0275023	-0.0227358	0.0266998	0.0485399	0.00901236	0.0037323	0.00824425	0.00468708
762	-2.96537	-3.00484	-2.96411	-2.94466	-2.98224	0.0168715	-0.0225952	0.0181313	0.0375829	0.00544981	0.00374306	0.00564594	0.00347187
764	-2.98935	-3.0313	-2.99375	-2.98743	-3.01724	0.0278828	-0.0140679	0.0234878	0.0298102	0.00913988	0.00439571	0.00727026	0.00260983
766	-3.00693	-3.07013	-3.01746	-3.01174	-3.04386	0.0369241	-0.0262709	0.0264008	0.0321176	0.0121698	0.00346174	0.00815359	0.00286574
768	-3.00854	-3.09896	-3.00526	-3.01748	-3.0537	0.0451653	-0.0452564	0.0484428	0.0362208	0.0149315	0.00200867	0.0148376	0.00332081
770	-2.99521	-3.07396	-3.00749	-2.98832	-3.03661	0.041405	-0.0373414	0.0291226	0.048295	0.0136713	0.00261445	0.00897894	0.00465992
772	-2.99505	-3.02902	-2.98759	-2.97149	-3.0248	0.0297432	-0.00421906	0.0372081	0.053303	0.00976332	0.0051495	0.0114308	0.00521535
774	-2.94309	-3.00023	-2.93549	-2.93496	-2.98132	0.0382276	-0.0189133	0.0458286	0.0463579	0.0126066	0.00402486	0.0140448	0.00444508
776	-2.89321	-2.96237	-2.89111	-2.88832	-2.94036	0.0471487	-0.0220127	0.049253	0.0520339	0.0155962	0.00378764	0.0150833	0.00507459
778	-2.83533	-2.9007	-2.84474	-2.8166	-2.87379	0.0384541	-0.0269153	0.0290499	0.0571842	0.0126825	0.00341242	0.00895689	0.0056458
780	-2.76005	-2.83241	-2.78142	-2.75039	-2.79092	0.0308647	-0.0414953	0.0094924	0.0405259	0.0101392	0.00229652	0.00302631	0.00379828
782	-2.65876	-2.7499	-2.676	-2.6818	-2.70743	0.0486689	-0.0424716	0.0314264	0.0256271	0.0161056	0.0022218	0.00967755	0.0021459
784	-2.57819	-2.66386	-2.58479	-2.5794	-2.62039	0.0422049	-0.0434713	0.0355976	0.0409865	0.0139394	0.00214529	0.0109424	0.00384936
786	-2.50693	-2.55044	-2.49472	-2.47338	-2.52732	0.0203912	-0.0231218	0.032599	0.0539365	0.00662934	0.00370275	0.0100331	0.0052856
788	-2.3789	-2.46169	-2.39867	-2.36639	-2.41738	0.03848	-0.0443108	0.0187073	0.050987	0.0126912	0.00208104	0.00582061	0.00495848
790	-2.29013	-2.36858	-2.30327	-2.29472	-2.32282	0.0326891	-0.0457654	0.0195477	0.0280979	0.0107505	0.00196971	0.00607546	0.00241992
792	-2.2046	-2.23903	-2.18456	-2.16063	-2.20522	0.000618935	-0.0338101	0.0206604	0.0445886	3.35115e-06	0.00288471	0.00641288	0.00424885
794	-2.07294	-2.14378	-2.08147	-2.06285	-2.10429	0.0313444	-0.0394979	0.0228157	0.0414336	0.0102999	0.0024494	0.00706645	0.00389894
796	-1.95898	-2.0256	-1.95269	-1.9622	-1.98594	0.0269617	-0.0396626	0.0332428	0.0237373	0.00883119	0.00243679	0.0102284	0.0019363
798	-1.85701	-1.92602	-1.8432	-1.8423	-1.87832	0.021309	-0.0476998	0.0351207	0.036016	0.0069369	0.00182166	0.0107978	0.00329809
800	-1.74178	-1.84231	-1.75228	-1.76869	-1.78335	0.0415648	-0.0589586	0.0310665	0.0146629	0.0137249	0.00095995	0.00956842	0.000929882
Trend Analysis, 500-570 nm
	Absorption					log relative absorption
nm	Acacia	Olive	VM	Eucalyptus	logRWL	Acacia	Olive	VM	Eucalyptus
500	0.0221981	0.0210301	0.0188524	0.023771	2.69897	-1.65368	-1.67716	-1.72463	-1.62395
502	0.0389387	0.0191422	0.0192568	0.0253622	2.7007	-1.40962	-1.71801	-1.71542	-1.59581
504	0.0372465	0.0207196	0.0336841	0.0234993	2.70243	-1.42891	-1.68362	-1.47258	-1.62894
506	0.0320994	0.0224742	0.0308302	0.0243361	2.70415	-1.4935	-1.64832	-1.51102	-1.61375
508	0.030099	0.0184644	0.0190068	0.0195745	2.70586	-1.52145	-1.73366	-1.72109	-1.70831
510	0.0341739	0.0165754	0.015305	0.0219064	2.70757	-1.46631	-1.78054	-1.81517	-1.65943
512	0.0291145	0.0189551	0.0235659	0.0209	2.70927	-1.53589	-1.72227	-1.62772	-1.67985
514	0.0193712	0.0145081	0.015712	0.0189706	2.71096	-1.71284	-1.83839	-1.80377	-1.72192
516	0.034362	0.0175257	0.0177565	0.0227382	2.71265	-1.46392	-1.75632	-1.75064	-1.64324
518	0.020528	0.0167083	0.0204154	0.0186243	2.71433	-1.68765	-1.77707	-1.69004	-1.72992
520	0.0326958	0.0110917	0.021246	0.015499	2.716	-1.48551	-1.955	-1.67272	-1.8097
522	0.0117123	0.0132468	0.0115718	0.0141461	2.71767	-1.93136	-1.87789	-1.9366	-1.84936
524	0.0226491	0.0142737	0.0138305	0.016345	2.71933	-1.64495	-1.84546	-1.85916	-1.78662
526	0.0232881	0.0132976	0.0206575	0.0137562	2.72099	-1.63287	-1.87623	-1.68492	-1.8615
528	0.0263904	0.012699	0.0220226	0.0158456	2.72263	-1.57855	-1.89623	-1.65713	-1.80009
530	0.0361118	0.0076693	0.0187738	0.0116338	2.72428	-1.44235	-2.11524	-1.72645	-1.93428
532	0.0212679	0.011335	0.00863264	0.0141869	2.72591	-1.67227	-1.94558	-2.06386	-1.84811
534	0.0181771	0.0102749	0.016465	0.0140564	2.72754	-1.74048	-1.98822	-1.78344	-1.85213
536	0.0257403	0.008837	0.0137507	0.0164617	2.72916	-1.58939	-2.05369	-1.86168	-1.78352
538	0.0284356	0.0118181	0.012483	0.0121516	2.73078	-1.54614	-1.92745	-1.90368	-1.91537
540	0.0192798	0.00992883	0.0200129	0.0137044	2.73239	-1.7149	-2.0031	-1.69869	-1.86314
542	0.0196823	0.00840962	0.0140957	0.0125806	2.734	-1.70592	-2.07522	-1.85091	-1.9003
544	0.0230843	0.010398	0.0140917	0.0114295	2.7356	-1.63668	-1.98305	-1.85104	-1.94197
546	0.0143631	0.00882493	0.00979985	0.00972647	2.73719	-1.84275	-2.05429	-2.00878	-2.01204
548	0.0160371	0.00907979	0.009605	0.0121018	2.73878	-1.79487	-2.04192	-2.0175	-1.91715
550	0.0245165	0.012337	0.0245181	0.0181763	2.74036	-1.61054	-1.90879	-1.61051	-1.74049
552	0.014831	0.0076366	0.0129305	0.00975622	2.74194	-1.82883	-2.1171	-1.88839	-2.01072
554	0.0224847	0.00748286	0.00601611	0.00737033	2.74351	-1.64811	-2.12593	-2.22068	-2.13251
556	0.0167614	0.00712321	0.0106225	0.00726874	2.74507	-1.77569	-2.14732	-1.97377	-2.13854
558	0.0121815	0.00634672	0.00348467	0.00893974	2.74663	-1.9143	-2.19745	-2.45784	-2.04867
560	0.0089552	0.00793257	0.0115529	0.00678669	2.74819	-2.04792	-2.10059	-1.93731	-2.16834
562	0.0241583	0.00872571	0.017074	0.00903249	2.74974	-1.61693	-2.0592	-1.76766	-2.04419
564	0.0206697	0.00664356	0.0208812	0.00646571	2.75128	-1.68467	-2.1776	-1.68024	-2.18938
566	0.0187754	0.00796011	0.0132344	0.00647502	2.75282	-1.72641	-2.09908	-1.8783	-2.18876
568	0.0124479	0.00673403	0.00859417	0.00968478	2.75435	-1.9049	-2.17172	-2.0658	-2.01391
570	0.0197074	0.00599526	0.0145115	0.00836449	2.75587	-1.70537	-2.22219	-1.83829	-2.07756
	Acacia	Olive	VM	Eucalyptus		Acacia	Olive	VM	Eucalyptus
Slope:	-0.000237103	-0.0002059	-0.000168062	-0.000246148	AAE:	5.55003	9.10141	6.0721	9.52901
Slope SD:	4.79119e-05	1.63486e-05	4.28149e-05	1.86018e-05	AAE SD:	1.21051	0.640692	1.62058	0.722645

## Sheet: UV-Vis 800C Fresh
Fresh Burns at 800 deg C
	Raw Integrated					Blank Subtracted				Normalized
nm	Acacia	Olive	VM	Eucalyptus	blank	Acacia	Olive	VM	Eucalyptus	Acacia	Olive	VM	Eucalyptus
200	347.817	347.818	344.237	326.079	349.346	-1.52936	-1.52826	-5.10956	-23.2671	-6.67515	-7.77164	-17.8588	-82.3565
202	261.875	262.064	259.373	241.323	263.491	-1.61603	-1.42709	-4.11826	-22.1682	-7.08094	-7.23757	-14.2719	-78.4482
204	194.345	194.892	193.005	174.547	195.676	-1.33131	-0.784286	-2.67113	-21.129	-5.7479	-3.84409	-9.03573	-74.7521
206	142.778	143.413	142.112	124.657	143.822	-1.04443	-0.409286	-1.71031	-19.1651	-4.40472	-1.8644	-5.55916	-67.7671
208	109.354	110.443	109.531	93.3901	110.404	-1.05015	0.0388184	-0.873268	-17.0139	-4.43147	0.501221	-2.53044	-60.1164
210	90.4749	91.717	91.2057	76.1224	91.3187	-0.843842	0.398346	-0.112976	-15.1964	-3.46554	2.39923	0.220571	-53.652
212	79.8574	80.9794	80.6639	67.0957	80.2373	-0.379959	0.742027	0.426598	-13.1417	-1.29362	4.21358	2.17294	-46.3443
214	72.9289	74.117	73.866	61.6947	73.2635	-0.334633	0.853439	0.602509	-11.5689	-1.0814	4.80174	2.80945	-40.7505
216	67.5154	68.6063	68.4053	57.5536	67.7018	-0.186401	0.904556	0.703506	-10.1482	-0.38738	5.07159	3.17489	-35.6976
218	62.3164	63.4846	63.1722	53.8018	62.5252	-0.208813	0.959332	0.646996	-8.72347	-0.49231	5.36076	2.97042	-30.6305
220	57.0662	58.1413	57.8721	49.7021	57.1079	-0.0416412	1.0334	0.764198	-7.40577	0.290392	5.75177	3.3945	-25.9439
222	51.2347	52.2318	52.0044	45.1821	51.2958	-0.0610771	0.936062	0.708595	-6.11366	0.199393	5.23792	3.19331	-21.3484
224	45.0172	45.9829	45.7174	39.9544	45.0112	0.00603485	0.971703	0.706207	-5.05679	0.513613	5.42607	3.18467	-17.5895
226	38.4778	39.2995	38.9508	34.6378	38.4987	-0.0209007	0.800755	0.45208	-3.86092	0.3875	4.52361	2.26514	-13.3363
228	32.1884	32.8671	32.5551	29.3165	32.163	0.0253639	0.704044	0.392059	-2.84651	0.604113	4.01306	2.04797	-9.72841
230	26.3866	26.9587	26.6314	24.0941	26.3346	0.0520096	0.624058	0.296757	-2.24053	0.728869	3.5908	1.70313	-7.57319
232	21.0534	21.5431	21.2244	19.4722	21.0302	0.0232372	0.512878	0.194195	-1.55799	0.594155	3.00386	1.33202	-5.14566
234	16.5319	16.9334	16.6213	15.3925	16.5321	-0.000221252	0.401312	0.0892448	-1.13956	0.484322	2.41488	0.952278	-3.65746
236	12.7049	12.9957	12.711	11.8984	12.7115	-0.00656986	0.284258	-0.000418663	-0.813047	0.454598	1.79694	0.627843	-2.49618
238	9.56983	9.77613	9.58617	9.02185	9.57929	-0.00946236	0.196834	0.00687981	-0.557446	0.441055	1.33541	0.654252	-1.58711
240	7.15087	7.26438	7.11649	6.77549	7.13892	0.0119548	0.125456	-0.0224299	-0.363427	0.541331	0.958594	0.548199	-0.897059
242	5.25185	5.3385	5.18337	4.96068	5.25918	-0.00732756	0.0793214	-0.075809	-0.298495	0.45105	0.715043	0.355054	-0.666123
244	3.71396	3.84552	3.68062	3.54777	3.74128	-0.027319	0.104237	-0.0606573	-0.193515	0.35745	0.846577	0.409879	-0.292748
246	2.57112	2.60691	2.50942	2.43553	2.59855	-0.0274382	0.00836015	-0.0891335	-0.16302	0.356892	0.340427	0.306842	-0.184291
248	1.6526	1.73542	1.64278	1.61516	1.69834	-0.0457484	0.0370772	-0.0555655	-0.0831794	0.271163	0.492029	0.428303	0.0996715
250	1.08053	1.08127	1.0005	1.07519	1.08558	-0.00504529	-0.0043093	-0.0850737	-0.0103915	0.461736	0.273543	0.321531	0.35855
252	0.592671	0.644844	0.560305	0.587076	0.672157	-0.0794855	-0.0273132	-0.111852	-0.0850813	0.113204	0.152101	0.22464	0.0929071
254	0.340231	0.401801	0.263274	0.296384	0.386714	-0.0464827	0.0150866	-0.12344	-0.0903307	0.267724	0.375937	0.182708	0.0742371
256	0.058701	0.110324	0.0290006	0.0630981	0.145491	-0.0867902	-0.0351671	-0.116491	-0.0823931	0.0790033	0.110639	0.207854	0.102468
258	-0.137526	-0.0781682	-0.207119	-0.120627	-0.108177	-0.0293489	0.0300091	-0.0989418	-0.01245	0.347945	0.454715	0.271352	0.351228
260	-0.235108	-0.177615	-0.295081	-0.352178	-0.268588	0.0334805	0.0909729	-0.0264925	-0.0835901	0.642115	0.776553	0.533499	0.0982107
262	-0.407081	-0.369589	-0.44157	-0.358274	-0.407481	0.000399768	0.0378919	-0.0340894	0.0492065	0.48723	0.49633	0.506011	0.570516
264	-0.524378	-0.446152	-0.628526	-0.453245	-0.454601	-0.0697769	0.00844845	-0.173925	0.0013561	0.15866	0.340893	3.61835e-05	0.400331
266	-0.564913	-0.46793	-0.624351	-0.549226	-0.597462	0.0325491	0.129532	-0.0268888	0.0482362	0.637754	0.980115	0.532065	0.567065
268	-0.681378	-0.588907	-0.705144	-0.642764	-0.641513	-0.0398644	0.0526066	-0.0636306	-0.00125068	0.298712	0.574011	0.39912	0.39106
270	-0.757901	-0.632965	-0.813305	-0.67855	-0.71226	-0.0456411	0.0792948	-0.101046	0.0337096	0.271665	0.714902	0.26374	0.5154
272	-0.76704	-0.724219	-0.838968	-0.752372	-0.763805	-0.00323457	0.039586	-0.0751629	0.0114326	0.470214	0.505273	0.357392	0.436169
274	-0.902572	-0.788621	-0.962074	-0.810999	-0.890401	-0.0121707	0.10178	-0.0716721	0.0794023	0.428374	0.833607	0.370023	0.677911
276	-0.949977	-0.868403	-1.01561	-0.935851	-0.964645	0.0146674	0.0962414	-0.0509701	0.028794	0.554031	0.804366	0.44493	0.497917
278	-1.08494	-0.979067	-1.0678	-0.972811	-1.01699	-0.0679449	0.0379258	-0.0508115	0.0441825	0.167238	0.496509	0.445504	0.552648
280	-1.05168	-0.96912	-1.06634	-1.10348	-1.09274	0.0410593	0.123622	0.0264	-0.0107371	0.677599	0.948914	0.724883	0.35732
282	-1.18641	-1.08172	-1.19207	-1.1637	-1.20004	0.01363	0.118325	0.00797594	0.0363419	0.549174	0.920949	0.658218	0.524762
284	-1.26375	-1.16018	-1.31219	-1.17025	-1.19567	-0.0680759	0.0354923	-0.116519	0.0254253	0.166624	0.483662	0.20775	0.485936
286	-1.27982	-1.24534	-1.36507	-1.30586	-1.25462	-0.0252024	0.00927675	-0.110456	-0.051244	0.367359	0.345265	0.22969	0.213253
288	-1.34755	-1.24444	-1.34578	-1.24141	-1.31825	-0.0293045	0.0738084	-0.0275333	0.0768313	0.348153	0.685939	0.529733	0.668767
290	-1.39491	-1.3109	-1.40497	-1.35678	-1.31963	-0.0752808	0.00873578	-0.0853339	-0.0371451	0.132891	0.34241	0.32059	0.263397
292	-1.39841	-1.36008	-1.46244	-1.38716	-1.34298	-0.0554304	-0.0170976	-0.119456	-0.0441823	0.225831	0.206031	0.197124	0.238369
294	-1.47254	-1.38832	-1.47526	-1.32762	-1.41572	-0.0568171	0.027397	-0.0595376	0.0881016	0.219339	0.440925	0.41393	0.708851
296	-1.42091	-1.40872	-1.47936	-1.47352	-1.42668	0.00577652	0.0179678	-0.0526748	-0.0468384	0.512404	0.391147	0.438762	0.228922
298	-1.47983	-1.45764	-1.53144	-1.46124	-1.45032	-0.0295076	-0.00731409	-0.0811117	-0.0109216	0.347202	0.25768	0.335867	0.356664
300	-1.50362	-1.46589	-1.56519	-1.42117	-1.48485	-0.0187697	0.0189698	-0.0803334	0.0636822	0.397477	0.396437	0.338684	0.622001
302	-1.49111	-1.46723	-1.58444	-1.459	-1.4416	-0.0495111	-0.0256279	-0.142837	-0.0173949	0.253545	0.160998	0.112524	0.333641
304	-1.5085	-1.47683	-1.55074	-1.46642	-1.45215	-0.0563531	-0.0246775	-0.0985904	-0.0142716	0.221511	0.166015	0.272623	0.344749
306	-1.51413	-1.52964	-1.58681	-1.47181	-1.47552	-0.0386081	-0.0541238	-0.111288	0.00371075	0.304594	0.0105638	0.22668	0.408706
308	-1.53772	-1.48255	-1.58501	-1.47226	-1.50825	-0.0294725	0.0256946	-0.0767623	0.0359831	0.347367	0.431938	0.351605	0.523486
310	-1.48596	-1.50092	-1.55638	-1.49769	-1.4726	-0.0133524	-0.0283185	-0.083779	-0.0250825	0.422842	0.146794	0.326216	0.306299
312	-1.54096	-1.48636	-1.5952	-1.48422	-1.50511	-0.035853	0.0187476	-0.0900961	0.0208862	0.317493	0.395263	0.303359	0.469792
314	-1.54194	-1.53949	-1.58211	-1.48046	-1.52143	-0.0205089	-0.0180607	-0.0606818	0.0409704	0.389335	0.200947	0.40979	0.541224
316	-1.49498	-1.47654	-1.53098	-1.56854	-1.45734	-0.0376358	-0.0191948	-0.0736349	-0.111194	0.309146	0.194959	0.362921	3.55661e-05
318	-1.56748	-1.52321	-1.61943	-1.52471	-1.51948	-0.0479982	-0.00372565	-0.0999436	-0.00522077	0.260629	0.276624	0.267727	0.37694
320	-1.60116	-1.61085	-1.64509	-1.48177	-1.57266	-0.0284981	-0.0381892	-0.0724336	0.0908872	0.351929	0.0946851	0.367268	0.718758
322	-1.59131	-1.55192	-1.61981	-1.57101	-1.58622	-0.00509524	0.0342995	-0.033592	0.0152067	0.461502	0.477365	0.50781	0.449592
324	-1.60575	-1.57887	-1.66014	-1.538	-1.59444	-0.0113053	0.0155765	-0.0657007	0.0564425	0.432426	0.378523	0.39163	0.596252
326	-1.64455	-1.59426	-1.71205	-1.5767	-1.597	-0.0475506	0.00273931	-0.115045	0.0203029	0.262725	0.310753	0.213083	0.467717
328	-1.62012	-1.62693	-1.68173	-1.60655	-1.62953	0.0094142	0.00259888	-0.0521975	0.0229759	0.529436	0.310012	0.440489	0.477224
330	-1.66006	-1.63973	-1.73138	-1.62188	-1.61539	-0.0446767	-0.0243484	-0.115998	-0.00649607	0.27618	0.167753	0.209636	0.372404
332	-1.62326	-1.61012	-1.71623	-1.65836	-1.63265	0.00939786	0.0225358	-0.0835781	-0.025705	0.529359	0.415262	0.326943	0.304085
334	-1.69604	-1.62051	-1.77451	-1.60555	-1.67897	-0.0170691	0.0584613	-0.0955416	0.0734178	0.40544	0.604919	0.283655	0.656626
336	-1.72105	-1.69653	-1.75493	-1.58023	-1.71358	-0.00746679	0.0170491	-0.0413495	0.133348	0.450398	0.386297	0.479741	0.869773
338	-1.71155	-1.71545	-1.75393	-1.62796	-1.69778	-0.0137657	-0.0176671	-0.0561508	0.0698185	0.420906	0.203025	0.426185	0.643825
340	-1.68214	-1.73375	-1.77914	-1.61753	-1.67763	-0.00450683	-0.0561148	-0.101504	0.0601006	0.464257	5.27916e-05	0.262081	0.609262
342	-1.68521	-1.68929	-1.72829	-1.62077	-1.6897	0.00449657	0.000417113	-0.0385888	0.068928	0.506411	0.298494	0.48973	0.640658
344	-1.70962	-1.68999	-1.77331	-1.61894	-1.65058	-0.0590425	-0.0394059	-0.122734	0.0316426	0.208919	0.0882616	0.185262	0.508048
346	-1.68788	-1.64508	-1.72637	-1.58458	-1.70253	0.0146496	0.0574473	-0.0238439	0.117947	0.553948	0.599566	0.543083	0.814998
348	-1.70341	-1.69918	-1.72048	-1.62479	-1.67701	-0.0263953	-0.022173	-0.0434731	0.0522207	0.361774	0.179237	0.472057	0.581237
350	-1.69923	-1.68198	-1.76704	-1.63328	-1.66382	-0.0354072	-0.0181518	-0.103221	0.0305481	0.31958	0.200466	0.25587	0.504156
352	-1.64072	-1.62769	-1.66931	-1.65296	-1.64336	0.00264406	0.0156727	-0.0259458	-0.00959229	0.497738	0.379031	0.535477	0.361392
354	-1.63112	-1.65996	-1.72628	-1.61535	-1.65442	0.0232998	-0.00554013	-0.0718617	0.0390723	0.594448	0.267045	0.369337	0.534473
356	-1.73133	-1.64503	-1.76712	-1.54477	-1.66264	-0.0686902	0.0176079	-0.104479	0.117866	0.163748	0.389247	0.251317	0.814713
358	-1.63635	-1.57061	-1.7028	-1.57267	-1.63528	-0.00107121	0.0646732	-0.0675206	0.0626072	0.480342	0.637712	0.385045	0.618177
360	-1.63306	-1.5811	-1.65069	-1.55166	-1.67297	0.039909	0.0918608	0.0222708	0.121309	0.672213	0.78124	0.709942	0.826956
362	-1.64921	-1.5761	-1.64125	-1.54095	-1.57517	-0.0740466	-0.000934839	-0.0660859	0.0342119	0.138669	0.291357	0.390236	0.517186
364	-1.59836	-1.56453	-1.65025	-1.52651	-1.58507	-0.0132926	0.0205441	-0.0651829	0.058562	0.423122	0.404747	0.393503	0.60379
366	-1.61722	-1.54552	-1.66755	-1.51413	-1.58762	-0.0295955	0.0421069	-0.0799251	0.0734892	0.346791	0.518581	0.340161	0.65688
368	-1.60677	-1.54415	-1.60486	-1.50298	-1.57583	-0.0309446	0.0316797	-0.0290303	0.0728438	0.340474	0.463535	0.524316	0.654585
370	-1.53851	-1.56636	-1.59807	-1.54425	-1.53874	0.000231266	-0.027616	-0.0593281	-0.0055083	0.486441	0.150502	0.414688	0.375917
372	-1.53879	-1.52794	-1.63736	-1.49313	-1.61873	0.0799352	0.090788	-0.0186346	0.125602	0.859617	0.775577	0.561932	0.842224
374	-1.6236	-1.51083	-1.6201	-1.50438	-1.57906	-0.0445411	0.0682271	-0.0410403	0.0746748	0.276815	0.656474	0.48086	0.661097
376	-1.64526	-1.61709	-1.66701	-1.49392	-1.62835	-0.0169097	0.0112659	-0.0386542	0.134429	0.406186	0.355766	0.489494	0.873619
378	-1.62113	-1.55931	-1.60422	-1.47756	-1.56766	-0.0534739	0.0083462	-0.036557	0.0901026	0.234991	0.340353	0.497082	0.715968
380	-1.57705	-1.54654	-1.5657	-1.48243	-1.60052	0.0234627	0.0539804	0.0348191	0.118089	0.595211	0.581263	0.755346	0.815505
382	-1.5487	-1.59459	-1.63417	-1.46581	-1.55827	0.0095669	-0.0363175	-0.0758998	0.0924581	0.53015	0.104566	0.354726	0.724345
384	-1.61946	-1.53001	-1.62828	-1.4431	-1.56264	-0.0568203	0.0326277	-0.0656443	0.119532	0.219323	0.468539	0.391834	0.820637
386	-1.61379	-1.55785	-1.62541	-1.48793	-1.62461	0.0108174	0.0667604	-0.000799775	0.136681	0.536005	0.648731	0.626464	0.88163
388	-1.63837	-1.58098	-1.62355	-1.4681	-1.53472	-0.103654	-0.0462613	-0.0888264	0.0666165	4.68203e-05	0.0520709	0.307953	0.632437
390	-1.58757	-1.55828	-1.63195	-1.52111	-1.61387	0.0263019	0.0555863	-0.0180771	0.0927559	0.608504	0.589741	0.563949	0.725405
392	-1.57106	-1.57973	-1.65728	-1.44201	-1.57996	0.00890648	0.000238419	-0.0773203	0.137955	0.527058	0.297551	0.349586	0.886159
394	-1.5997	-1.53154	-1.64354	-1.50389	-1.59387	-0.00582874	0.0623277	-0.0496638	0.0899861	0.458068	0.62533	0.449657	0.715553
396	-1.54715	-1.50065	-1.61236	-1.47721	-1.51459	-0.0325558	0.0139453	-0.0977697	0.03738	0.33293	0.369912	0.275593	0.528454
398	-1.59042	-1.53898	-1.57234	-1.5608	-1.58384	-0.00658488	0.0448537	0.0114958	0.0230399	0.454527	0.533082	0.670954	0.477452
400	-1.55775	-1.53624	-1.62609	-1.48118	-1.51213	-0.0456206	-0.0241141	-0.113964	0.0309448	0.271761	0.16899	0.216995	0.505567
402	-1.50177	-1.52881	-1.50925	-1.5355	-1.61169	0.109928	0.0828859	0.102444	0.0761944	1.00005	0.73386	1.00004	0.666502
404	-1.54019	-1.58606	-1.58061	-1.45474	-1.61306	0.0728624	0.0269971	0.0324428	0.158317	0.826502	0.438814	0.746748	0.958579
406	-1.56081	-1.50601	-1.57281	-1.49873	-1.63932	0.0785033	0.133309	0.0665082	0.140583	0.852913	1.00005	0.870008	0.895508
408	-1.53743	-1.53007	-1.62934	-1.45487	-1.5824	0.0449755	0.0523286	-0.0469431	0.127533	0.695935	0.572543	0.459502	0.849093
410	-1.5519	-1.4999	-1.60424	-1.45108	-1.56237	0.0104778	0.0624758	-0.0418612	0.111296	0.534415	0.626112	0.47789	0.791346
412	-1.56858	-1.59298	-1.64692	-1.41532	-1.58529	0.0167131	-0.00769079	-0.0616323	0.169973	0.563609	0.255691	0.406351	1.00004
414	-1.51752	-1.50539	-1.59372	-1.43941	-1.57538	0.0578557	0.0699866	-0.01834	0.135967	0.75624	0.665763	0.562998	0.87909
416	-1.53618	-1.46159	-1.59046	-1.51455	-1.53869	0.00251615	0.0770997	-0.0517641	0.0241429	0.497139	0.703314	0.442057	0.481375
418	-1.55308	-1.54164	-1.55326	-1.45154	-1.59668	0.0436043	0.0550416	0.0434239	0.145143	0.689515	0.586865	0.786481	0.911723
420	-1.53431	-1.54503	-1.58827	-1.48215	-1.51218	-0.0221307	-0.0328488	-0.0760922	0.0300312	0.381741	0.122878	0.354029	0.502317
422	-1.46644	-1.44065	-1.44168	-1.47214	-1.49782	0.0313836	0.0571662	0.0561433	0.0256823	0.632297	0.598082	0.832504	0.48685
424	-1.45903	-1.4368	-1.50377	-1.42232	-1.47357	0.0145406	0.036768	-0.0302036	0.0512552	0.553437	0.490396	0.520071	0.577803
426	-1.47221	-1.4568	-1.52828	-1.37712	-1.52989	0.0576838	0.073095	0.00161147	0.152767	0.755436	0.682172	0.635189	0.938839
428	-1.46285	-1.42934	-1.48964	-1.43078	-1.4919	0.0290534	0.0625625	0.00225997	0.0611157	0.621387	0.62657	0.637536	0.612873
430	-1.41719	-1.43251	-1.50004	-1.41563	-1.45028	0.0330915	0.0177776	-0.0497555	0.0346479	0.640294	0.390143	0.449325	0.518737
432	-1.42001	-1.40569	-1.4975	-1.32356	-1.47028	0.0502694	0.0645919	-0.0272199	0.14672	0.720721	0.637283	0.530867	0.917332
434	-1.42611	-1.4401	-1.50078	-1.36862	-1.4631	0.0369805	0.0229915	-0.0376838	0.0944794	0.658502	0.417668	0.493005	0.731534
436	-1.44018	-1.37607	-1.50287	-1.36919	-1.44009	-9.72748e-05	0.0640188	-0.0627806	0.0708973	0.484902	0.634258	0.402196	0.647662
438	-1.45466	-1.45581	-1.46813	-1.36919	-1.46899	0.0143341	0.0131788	0.000856042	0.0998001	0.552471	0.365865	0.632456	0.750458
440	-1.45564	-1.43238	-1.52226	-1.385	-1.44127	-0.0143688	0.00889421	-0.080982	0.0562705	0.418083	0.343246	0.336337	0.59564
442	-1.41996	-1.36651	-1.4593	-1.4178	-1.41727	-0.00269544	0.0507573	-0.0420377	-0.000537872	0.472738	0.564248	0.477251	0.393595
444	-1.44448	-1.39488	-1.48466	-1.38923	-1.47739	0.0329151	0.0825121	-0.00726473	0.0881592	0.639468	0.731887	0.603072	0.709056
446	-1.47466	-1.43585	-1.49097	-1.3726	-1.4348	-0.0398575	-0.00105238	-0.0561726	0.062203	0.298744	0.290736	0.426106	0.61674
448	-1.42053	-1.40716	-1.45344	-1.35675	-1.41375	-0.00677395	0.00659668	-0.0396897	0.0570029	0.453642	0.331117	0.485747	0.598245
450	-1.42069	-1.40934	-1.41278	-1.36613	-1.41566	-0.00503802	0.00631762	0.00287843	0.0495256	0.46177	0.329644	0.639773	0.571651
452	-1.42615	-1.39472	-1.44936	-1.3493	-1.42036	-0.00578511	0.0256422	-0.0289971	0.0710665	0.458272	0.431661	0.524437	0.648264
454	-1.44018	-1.40001	-1.48686	-1.38874	-1.43568	-0.00450122	0.0356667	-0.0511823	0.0469369	0.464283	0.484582	0.444163	0.562444
456	-1.4154	-1.37741	-1.44931	-1.35767	-1.4539	0.038499	0.0764951	0.00458848	0.096229	0.665612	0.700122	0.645961	0.737757
458	-1.34954	-1.39598	-1.44758	-1.29565	-1.4204	0.0708554	0.0244186	-0.0271759	0.12475	0.817105	0.425202	0.531026	0.839197
460	-1.39419	-1.38015	-1.42422	-1.33362	-1.40953	0.0153314	0.0293714	-0.0146943	0.0759096	0.55714	0.451348	0.576189	0.665489
462	-1.39977	-1.38494	-1.43373	-1.26637	-1.41022	0.0104551	0.0252784	-0.0235081	0.143849	0.534309	0.429741	0.544298	0.907121
464	-1.35392	-1.33982	-1.44135	-1.28092	-1.39932	0.0454024	0.0594944	-0.0420305	0.118395	0.697934	0.610373	0.477277	0.816594
466	-1.37707	-1.34385	-1.39912	-1.2822	-1.34085	-0.0362283	-0.00300062	-0.0582741	0.0586469	0.315736	0.280451	0.418502	0.604092
468	-1.38219	-1.28226	-1.40709	-1.2901	-1.3483	-0.0338928	0.0660454	-0.0587906	0.0582047	0.326671	0.644957	0.416633	0.602519
470	-1.32869	-1.30148	-1.36946	-1.25826	-1.26344	-0.0652465	-0.0380423	-0.106013	0.00518346	0.179872	0.0954604	0.245764	0.413943
472	-1.34508	-1.34634	-1.42288	-1.274	-1.34842	0.0033468	0.00208545	-0.0744528	0.0744265	0.501028	0.307301	0.359962	0.660214
474	-1.37233	-1.30085	-1.39056	-1.25239	-1.34767	-0.0246549	0.046826	-0.0428909	0.0952774	0.369923	0.543494	0.474164	0.734373
476	-1.32765	-1.31959	-1.37714	-1.36467	-1.37684	0.0491879	0.0572482	-0.000296474	0.0121657	0.715657	0.598515	0.628285	0.438776
478	-1.35404	-1.3288	-1.366	-1.25943	-1.34823	-0.0058018	0.0194325	-0.0177623	0.0888028	0.458194	0.39888	0.565088	0.711345
480	-1.35546	-1.27421	-1.3896	-1.28731	-1.35318	-0.00228059	0.0789757	-0.0364207	0.0658751	0.47468	0.713218	0.497575	0.6298
482	-1.42465	-1.4038	-1.47255	-1.3465	-1.4026	-0.0220554	-0.00120509	-0.069958	0.0560982	0.382094	0.28993	0.376225	0.595027
484	-1.36973	-1.37244	-1.43432	-1.31553	-1.39304	0.0233139	0.0205985	-0.0412831	0.0775125	0.594514	0.405035	0.479981	0.67119
486	-1.26018	-1.27052	-1.34343	-1.20417	-1.29972	0.0395464	0.0292035	-0.0437087	0.0955496	0.670515	0.450462	0.471205	0.73534
488	-1.29628	-1.2669	-1.33206	-1.24242	-1.34199	0.0457153	0.0750911	0.00993478	0.0995679	0.699399	0.69271	0.665306	0.749632
490	-1.23175	-1.18918	-1.28759	-1.15135	-1.28805	0.0563037	0.098875	0.000457525	0.136704	0.748974	0.81827	0.631014	0.881711
492	-1.24486	-1.22684	-1.31089	-1.21807	-1.28455	0.03969	0.0577103	-0.0263313	0.0664818	0.671188	0.600954	0.534082	0.631958
494	-1.36089	-1.31641	-1.38995	-1.27264	-1.3276	-0.0332953	0.0111877	-0.0623589	0.0549566	0.329468	0.355354	0.403722	0.590967
496	-1.29879	-1.28932	-1.37113	-1.29409	-1.33692	0.0381298	0.047599	-0.0342137	0.0428277	0.663883	0.547575	0.505561	0.547829
498	-1.32896	-1.30071	-1.38292	-1.2822	-1.36354	0.0345824	0.0628337	-0.01938	0.0813425	0.647274	0.628001	0.559235	0.684811
500	-1.36797	-1.32187	-1.37668	-1.25971	-1.34693	-0.0210407	0.0250593	-0.0297478	0.0872222	0.386845	0.428584	0.52172	0.705723
502	-1.31042	-1.29799	-1.37736	-1.25847	-1.33029	0.019869	0.0323008	-0.0470691	0.0718211	0.578385	0.466813	0.459046	0.650948
504	-1.34036	-1.32521	-1.38211	-1.23806	-1.36482	0.0244627	0.0396148	-0.0172855	0.126761	0.599893	0.505425	0.566813	0.846348
506	-1.31479	-1.27099	-1.39178	-1.24503	-1.36505	0.0502597	0.0940574	-0.0267296	0.120023	0.720676	0.792837	0.532641	0.822384
508	-1.35039	-1.31487	-1.35401	-1.22582	-1.34398	-0.00641978	0.0291028	-0.0100343	0.118158	0.4553	0.44993	0.59305	0.815751
510	-1.33685	-1.31283	-1.38432	-1.22866	-1.33496	-0.00189412	0.0221246	-0.0493624	0.106294	0.47649	0.413092	0.450747	0.773555
512	-1.35552	-1.30463	-1.38996	-1.25788	-1.36093	0.00540662	0.0562985	-0.0290279	0.103043	0.510672	0.593501	0.524325	0.76199
514	-1.31058	-1.31557	-1.39783	-1.26716	-1.33385	0.0232705	0.0182854	-0.0639743	0.0666971	0.594311	0.392824	0.397877	0.632724
516	-1.33786	-1.30981	-1.42498	-1.19996	-1.34055	0.00268948	0.0307405	-0.0844271	0.140593	0.49795	0.458576	0.323871	0.895541
518	-1.313	-1.27246	-1.35619	-1.22564	-1.32839	0.0153874	0.0559311	-0.0277992	0.102745	0.557402	0.591561	0.528771	0.760932
520	-1.27522	-1.28482	-1.35992	-1.22786	-1.31027	0.0350428	0.0254505	-0.0496578	0.0824031	0.649429	0.430649	0.449679	0.688583
522	-1.28502	-1.29419	-1.35024	-1.20227	-1.2931	0.00808179	-0.00109231	-0.0571393	0.0908291	0.523197	0.290525	0.422608	0.718552
524	-1.2895	-1.28123	-1.36682	-1.2361	-1.30285	0.0133566	0.0216198	-0.0639727	0.0667527	0.547894	0.410426	0.397882	0.632921
526	-1.28313	-1.25935	-1.34161	-1.23471	-1.28847	0.00533879	0.0291162	-0.0531397	0.053759	0.510354	0.450001	0.43708	0.586708
528	-1.28533	-1.25497	-1.34469	-1.21226	-1.29188	0.00655472	0.0369089	-0.0528072	0.0796225	0.516047	0.49114	0.438283	0.678694
530	-1.24333	-1.21744	-1.3203	-1.23431	-1.2858	0.0424753	0.0683669	-0.0344913	0.0514902	0.684229	0.657212	0.504556	0.578638
532	-1.2372	-1.26326	-1.313	-1.20024	-1.26904	0.0318421	0.00577843	-0.0439583	0.0688035	0.634444	0.326797	0.470301	0.640215
534	-1.27415	-1.2401	-1.31639	-1.20028	-1.2715	-0.00264227	0.0314085	-0.0448811	0.0712211	0.472987	0.462103	0.466962	0.648814
536	-1.25508	-1.2365	-1.30037	-1.20687	-1.26921	0.0141331	0.0327178	-0.0311515	0.0623394	0.55153	0.469015	0.516641	0.617225
538	-1.27439	-1.22884	-1.31743	-1.16787	-1.27379	-0.000600338	0.0449493	-0.0436379	0.105919	0.482547	0.533587	0.471461	0.772219
540	-1.24565	-1.23538	-1.3181	-1.19613	-1.26195	0.0162978	0.026569	-0.0561466	0.0658166	0.561665	0.436554	0.4262	0.629592
542	-1.24395	-1.21776	-1.32057	-1.20079	-1.25911	0.0151637	0.0413522	-0.0614556	0.058327	0.556355	0.514597	0.40699	0.602954
544	-1.25117	-1.22195	-1.31058	-1.15984	-1.26283	0.011657	0.0408762	-0.0477531	0.102994	0.539936	0.512084	0.456571	0.761816
546	-1.237	-1.22237	-1.3109	-1.15032	-1.2286	-0.00840616	0.0062232	-0.0822998	0.0782739	0.446	0.329145	0.331568	0.673898
548	-1.23709	-1.22212	-1.30979	-1.17091	-1.24592	0.00882983	0.0237936	-0.0638752	0.0750037	0.526699	0.421902	0.398235	0.662267
550	-1.25374	-1.24076	-1.3096	-1.13507	-1.27777	0.024034	0.0370114	-0.0318315	0.142703	0.597886	0.491681	0.514181	0.903045
552	-1.25332	-1.199	-1.29201	-1.17484	-1.23687	-0.0164486	0.0378726	-0.0551369	0.0620327	0.408345	0.496227	0.429853	0.616134
554	-1.22534	-1.19657	-1.28597	-1.15644	-1.22968	0.0043366	0.0331055	-0.0562872	0.0732344	0.505662	0.471061	0.425691	0.655974
556	-1.23686	-1.2024	-1.29025	-1.16777	-1.23038	-0.00647569	0.0279797	-0.0598638	0.062616	0.455039	0.444002	0.41275	0.618209
558	-1.22812	-1.20847	-1.31894	-1.17609	-1.22404	-0.00408781	0.0155635	-0.0949079	0.0479423	0.466219	0.378454	0.285948	0.56602
560	-1.22477	-1.19688	-1.28589	-1.14869	-1.22168	-0.00308454	0.0248052	-0.0642058	0.0729952	0.470916	0.427243	0.397039	0.655123
562	-1.22833	-1.20836	-1.31972	-1.16478	-1.25618	0.0278448	0.0478148	-0.0635396	0.0913948	0.615728	0.548714	0.399449	0.720563
564	-1.23182	-1.20785	-1.2807	-1.20714	-1.26409	0.0322742	0.0562482	-0.0166104	0.0569546	0.636467	0.593235	0.569256	0.598073
566	-1.27366	-1.24785	-1.33236	-1.18816	-1.27988	0.00621855	0.0320289	-0.0524776	0.0917165	0.514473	0.465378	0.439476	0.721708
568	-1.28645	-1.24405	-1.35961	-1.19332	-1.29002	0.00357771	0.045974	-0.0695891	0.0967067	0.502109	0.538996	0.37756	0.739456
570	-1.31007	-1.29388	-1.36406	-1.21628	-1.31647	0.00640118	0.0225893	-0.0475942	0.10019	0.515328	0.415545	0.457146	0.751844
572	-1.30497	-1.28637	-1.37101	-1.2329	-1.3301	0.0251279	0.0437319	-0.0409108	0.0971975	0.603008	0.52716	0.481328	0.741202
574	-1.31395	-1.28049	-1.36764	-1.23556	-1.31995	0.00600755	0.0394684	-0.047683	0.0843937	0.513485	0.504652	0.456824	0.695664
576	-1.29761	-1.27393	-1.36271	-1.23107	-1.29698	-0.000625491	0.0230482	-0.0657271	0.0659127	0.482429	0.417967	0.391534	0.629934
578	-1.31413	-1.27509	-1.38696	-1.24189	-1.33729	0.0231653	0.0622027	-0.049664	0.0953988	0.593819	0.62467	0.449656	0.734804
580	-1.27889	-1.25115	-1.35325	-1.20856	-1.30009	0.0211955	0.0489402	-0.0531598	0.0915239	0.584596	0.554655	0.437007	0.721023
582	-1.28388	-1.25802	-1.35978	-1.22157	-1.30851	0.0246309	0.0504874	-0.0512681	0.0869424	0.600681	0.562823	0.443852	0.704728
584	-1.27541	-1.25109	-1.32861	-1.20035	-1.29042	0.0150124	0.0393373	-0.0381893	0.0900718	0.555646	0.50396	0.491176	0.715858
586	-1.25681	-1.22527	-1.3242	-1.17453	-1.27718	0.020367	0.0519106	-0.0470163	0.102645	0.580717	0.570337	0.459237	0.760577
588	-1.28633	-1.251	-1.33975	-1.19506	-1.29325	0.00692487	0.0422498	-0.0464975	0.0981898	0.51778	0.519336	0.461114	0.744731
590	-1.29671	-1.28917	-1.37219	-1.24415	-1.31702	0.0203097	0.0278503	-0.0551677	0.0728763	0.580449	0.443318	0.429742	0.654701
592	-1.31741	-1.29758	-1.39278	-1.23907	-1.32436	0.00695097	0.0267884	-0.0684144	0.0852984	0.517903	0.437712	0.38181	0.698881
594	-1.34442	-1.32784	-1.40324	-1.27313	-1.35744	0.0130193	0.0295978	-0.0457982	0.0843101	0.546315	0.452543	0.463644	0.695366
596	-1.37667	-1.33326	-1.43944	-1.30121	-1.3963	0.0196295	0.0630399	-0.0431393	0.0950873	0.577264	0.62909	0.473265	0.733696
598	-1.37597	-1.34361	-1.4311	-1.35314	-1.40194	0.0259696	0.0583339	-0.0291541	0.0488017	0.606949	0.604246	0.523868	0.569076
600	-1.45064	-1.40806	-1.49285	-1.33462	-1.42618	-0.0244572	0.0181215	-0.0666746	0.0915619	0.370848	0.391958	0.388106	0.721158
602	-1.46352	-1.43476	-1.49657	-1.36933	-1.46438	0.000858545	0.0296119	-0.0321994	0.0950452	0.489378	0.452618	0.512849	0.733547
604	-1.44784	-1.41903	-1.51632	-1.38723	-1.46736	0.019522	0.048329	-0.0489564	0.0801307	0.57676	0.551429	0.452217	0.680502
606	-1.46126	-1.43387	-1.52521	-1.3874	-1.4679	0.00664604	0.0340323	-0.0573092	0.0805014	0.516475	0.475954	0.421993	0.68182
608	-1.45934	-1.44266	-1.53595	-1.36543	-1.47167	0.0123276	0.0290143	-0.0642835	0.106243	0.543076	0.449464	0.396758	0.773372
610	-1.44671	-1.40707	-1.50128	-1.37245	-1.45349	0.00677395	0.0464159	-0.0477889	0.0810417	0.517074	0.541329	0.456441	0.683742
612	-1.4142	-1.39094	-1.48833	-1.34962	-1.44686	0.0326585	0.0559216	-0.0414699	0.0972451	0.638266	0.591511	0.479305	0.741371
614	-1.42119	-1.37849	-1.49076	-1.33437	-1.43381	0.0126255	0.0553193	-0.0569493	0.0994372	0.544471	0.588332	0.423296	0.749167
616	-1.38043	-1.35348	-1.43824	-1.29532	-1.40658	0.0261436	0.0530992	-0.0316659	0.111261	0.607763	0.576611	0.51478	0.791219
618	-1.36225	-1.32842	-1.43717	-1.26465	-1.35395	-0.00830686	0.0255202	-0.0832227	0.0892967	0.446465	0.431017	0.328229	0.713101
620	-1.35104	-1.30758	-1.42886	-1.26869	-1.36382	0.012785	0.0562435	-0.0650409	0.0951315	0.545218	0.593211	0.394017	0.733854
622	-1.37704	-1.34211	-1.43243	-1.26341	-1.36428	-0.0127602	0.0221753	-0.0681446	0.100867	0.425614	0.413359	0.382787	0.754252
624	-1.32941	-1.31159	-1.39219	-1.24761	-1.34795	0.0185469	0.0363635	-0.044237	0.10034	0.572195	0.488261	0.469293	0.752379
626	-1.30919	-1.27337	-1.39348	-1.224	-1.3197	0.0105041	0.046324	-0.0737813	0.0956961	0.534539	0.540844	0.362391	0.735862
628	-1.31487	-1.26616	-1.34729	-1.20247	-1.32449	0.00961661	0.058321	-0.0228037	0.122016	0.530383	0.604178	0.546846	0.82947
630	-1.29229	-1.22498	-1.32637	-1.18873	-1.27702	-0.0152692	0.0520408	-0.0493503	0.0882902	0.413867	0.571024	0.450791	0.709522
632	-1.21859	-1.17993	-1.27533	-1.19911	-1.21405	-0.0045377	0.0341296	-0.0612745	0.014945	0.464112	0.476468	0.407645	0.448662
634	-1.22362	-1.20872	-1.29193	-1.15614	-1.24205	0.018432	0.0333364	-0.0498781	0.0859169	0.571657	0.47228	0.448881	0.701081
636	-1.19331	-1.17579	-1.28678	-1.10592	-1.2142	0.0208943	0.0384158	-0.0725806	0.108287	0.583186	0.499095	0.366736	0.780643
638	-1.22669	-1.18421	-1.29752	-1.14923	-1.2311	0.00440836	0.0468947	-0.0664165	0.0818685	0.505998	0.543857	0.38904	0.686682
640	-1.22132	-1.17339	-1.28958	-1.16693	-1.2351	0.0137782	0.0617039	-0.0544807	0.0681657	0.549868	0.622037	0.432228	0.637947
642	-1.24068	-1.20605	-1.30916	-1.16342	-1.23085	-0.00983632	0.0247946	-0.0783098	0.0674305	0.439304	0.427187	0.346006	0.635332
644	-1.25619	-1.23693	-1.33158	-1.19342	-1.254	-0.00219548	0.0170684	-0.0775862	0.0605767	0.475079	0.386399	0.348624	0.610956
646	-1.21641	-1.17286	-1.27914	-1.15019	-1.21228	-0.00412226	0.0394267	-0.066855	0.0620893	0.466057	0.504432	0.387453	0.616335
648	-1.25828	-1.22006	-1.35646	-1.19187	-1.27893	0.0206523	0.0588723	-0.0775319	0.0870589	0.582053	0.607089	0.34882	0.705142
650	-1.273	-1.27057	-1.36607	-1.23543	-1.31015	0.0371407	0.0395703	-0.055925	0.0747199	0.659252	0.50519	0.427002	0.661257
652	-1.61318	-1.60093	-1.69207	-1.51848	-1.6266	0.0134193	0.0256687	-0.0654761	0.108117	0.548187	0.431802	0.392443	0.780036
654	-1.42909	-1.41123	-1.50859	-1.36478	-1.43432	0.00522912	0.0230968	-0.0742654	0.0695374	0.509841	0.418224	0.36064	0.642825
656	-1.33682	-1.32175	-1.4085	-1.27304	-1.34287	0.00605118	0.021122	-0.0656272	0.0698304	0.51369	0.407798	0.391896	0.643867
658	-1.36834	-1.33759	-1.43492	-1.30257	-1.36054	-0.00780165	0.0229483	-0.0743788	0.0579672	0.44883	0.41744	0.360229	0.601675
660	-1.26225	-1.19647	-1.31098	-1.17361	-1.27776	0.015502	0.0812833	-0.0332215	0.104151	0.557939	0.7254	0.509151	0.765932
662	-1.33584	-1.29144	-1.38253	-1.24845	-1.35257	0.0167297	0.0611368	-0.0299562	0.104127	0.563687	0.619043	0.520966	0.765846
664	-1.40415	-1.3895	-1.50214	-1.33613	-1.42623	0.0220826	0.0367299	-0.0759095	0.0900953	0.588749	0.490195	0.354691	0.715942
666	-1.46107	-1.44073	-1.5283	-1.37159	-1.44836	-0.0127099	0.00762165	-0.0799458	0.0767634	0.42585	0.336528	0.340086	0.668525
668	-1.47406	-1.40732	-1.5187	-1.37386	-1.4582	-0.0158603	0.0508763	-0.0604992	0.0843397	0.411099	0.564876	0.410451	0.695471
670	-1.4614	-1.4421	-1.52368	-1.36105	-1.46448	0.00307798	0.0223768	-0.0591965	0.103429	0.499769	0.414423	0.415164	0.763364
672	-1.42647	-1.41476	-1.50942	-1.37073	-1.44558	0.0191146	0.0308181	-0.063833	0.074857	0.574853	0.458986	0.398388	0.661745
674	-1.40127	-1.39979	-1.50667	-1.36282	-1.4299	0.0286331	0.0301136	-0.0767654	0.0670772	0.619419	0.455267	0.351594	0.634075
676	-1.43884	-1.3919	-1.50227	-1.34629	-1.43488	-0.00396073	0.0429847	-0.0673912	0.0885921	0.466814	0.523215	0.385513	0.710595
678	-1.42334	-1.40865	-1.49625	-1.36021	-1.42891	0.00556874	0.0202595	-0.0673429	0.0686997	0.511431	0.403245	0.385688	0.639846
680	-1.42779	-1.40267	-1.46584	-1.35433	-1.43635	0.00855851	0.0336747	-0.0294969	0.0820162	0.525429	0.474066	0.522628	0.687208
682	-1.42548	-1.40856	-1.48626	-1.33798	-1.44251	0.0170337	0.0339495	-0.0437547	0.104535	0.56511	0.475517	0.471038	0.767297
684	-1.41958	-1.39732	-1.48702	-1.37479	-1.437	0.0174209	0.039677	-0.0500268	0.0622075	0.566923	0.505754	0.448344	0.616756
686	-1.42803	-1.39737	-1.48666	-1.36635	-1.44564	0.017608	0.0482723	-0.0410221	0.0792874	0.567799	0.551129	0.480926	0.677502
688	-1.43867	-1.42786	-1.53877	-1.3589	-1.45518	0.016508	0.0273212	-0.0835912	0.0962772	0.562649	0.440525	0.326896	0.737928
690	-1.46907	-1.44553	-1.51321	-1.3697	-1.45905	-0.0100214	0.0135161	-0.0541595	0.0893494	0.438437	0.367646	0.43339	0.713289
692	-1.46056	-1.44193	-1.55403	-1.40678	-1.49294	0.0323864	0.0510114	-0.0610858	0.0861588	0.636992	0.56559	0.408328	0.701941
694	-1.49832	-1.47136	-1.57401	-1.41948	-1.50577	0.00745142	0.0344132	-0.0682375	0.0862938	0.520246	0.477965	0.382451	0.702421
696	-1.51442	-1.47939	-1.57604	-1.4398	-1.52409	0.00967109	0.0447057	-0.0519414	0.0842915	0.530638	0.532301	0.441416	0.6953
698	-1.51527	-1.50367	-1.60053	-1.48235	-1.54388	0.0286063	0.0402118	-0.0566577	0.0615284	0.619294	0.508577	0.424351	0.614341
700	-1.56779	-1.54785	-1.63642	-1.47054	-1.58219	0.0143995	0.034333	-0.0542341	0.111651	0.552777	0.477542	0.43312	0.792606
702	-1.58161	-1.56377	-1.65906	-1.50644	-1.60073	0.0191221	0.0369626	-0.0583308	0.094293	0.574888	0.491424	0.418297	0.730871
704	-1.63872	-1.59394	-1.68429	-1.54559	-1.62881	-0.0099107	0.0348619	-0.0554812	0.083212	0.438956	0.480334	0.428608	0.691461
706	-1.65439	-1.6258	-1.72508	-1.58312	-1.66692	0.0125251	0.041122	-0.0581622	0.0837977	0.544001	0.513382	0.418907	0.693544
708	-1.68632	-1.67786	-1.76964	-1.63595	-1.71415	0.0278327	0.0362917	-0.0554889	0.0782036	0.615672	0.487882	0.42858	0.673647
710	-1.76828	-1.74383	-1.82995	-1.69077	-1.77104	0.00275695	0.0272045	-0.0589135	0.0802634	0.498266	0.439909	0.416188	0.680973
712	-1.83461	-1.81362	-1.91229	-1.75434	-1.84281	0.00819969	0.029192	-0.0694795	0.0884688	0.523749	0.450401	0.377957	0.710157
714	-1.9324	-1.88659	-1.99185	-1.859	-1.9344	0.00200248	0.0478137	-0.0574499	0.0754029	0.494734	0.548708	0.421484	0.663686
716	-2.01817	-1.99793	-2.08942	-1.96003	-2.04107	0.0229075	0.0431408	-0.0483487	0.0810438	0.592612	0.524039	0.454416	0.683749
718	-2.13574	-2.10573	-2.18856	-2.05728	-2.15291	0.0171738	0.0471795	-0.0356462	0.0956364	0.565766	0.54536	0.500378	0.735649
720	-2.23611	-2.23566	-2.31414	-2.17708	-2.2516	0.0154893	0.0159388	-0.0625432	0.0745192	0.55788	0.380435	0.403055	0.660543
722	-2.36972	-2.33609	-2.44263	-2.28772	-2.38984	0.0201225	0.0537524	-0.0527864	0.102123	0.579572	0.58006	0.438358	0.75872
724	-2.46853	-2.4389	-2.5517	-2.39609	-2.4762	0.00766563	0.0372937	-0.0755007	0.0801096	0.521249	0.493171	0.35617	0.680426
726	-2.59148	-2.57818	-2.66221	-2.52216	-2.60016	0.0086813	0.0219817	-0.0620563	0.0779963	0.526004	0.412337	0.404816	0.67291
728	-2.73832	-2.72673	-2.80433	-2.66976	-2.75762	0.0192945	0.0308814	-0.0467107	0.087851	0.575695	0.45932	0.460342	0.70796
730	-2.93671	-2.90952	-3.00427	-2.86124	-2.92456	-0.0121517	0.0150385	-0.0797062	0.0633171	0.428463	0.375683	0.340953	0.620702
732	-3.12481	-3.10583	-3.18808	-3.05955	-3.13655	0.0117416	0.030724	-0.0515239	0.0769987	0.540333	0.458489	0.442926	0.669362
734	-3.29777	-3.25977	-3.35484	-3.21755	-3.31514	0.0173726	0.0553713	-0.0396969	0.0975921	0.566697	0.588606	0.485721	0.742605
736	-3.39468	-3.37614	-3.47295	-3.3187	-3.40412	0.00943494	0.0279822	-0.06883	0.0854185	0.529533	0.444015	0.380307	0.699308
738	-3.42039	-3.41616	-3.49813	-3.35119	-3.43102	0.0106273	0.014859	-0.0671141	0.0798283	0.535115	0.374735	0.386516	0.679426
740	-3.38921	-3.38814	-3.45669	-3.30437	-3.39112	0.00190616	0.0029726	-0.0655708	0.0867448	0.494283	0.311985	0.3921	0.704025
742	-3.32277	-3.30148	-3.38258	-3.23185	-3.33496	0.012193	0.0334768	-0.0476248	0.103107	0.542446	0.473022	0.457035	0.76222
744	-3.22057	-3.18952	-3.28527	-3.13361	-3.22288	0.00231242	0.0333624	-0.0623858	0.0892715	0.496185	0.472418	0.403624	0.713012
746	-3.1278	-3.10711	-3.18744	-3.04327	-3.11762	-0.0101774	0.0105114	-0.0698221	0.0743482	0.437707	0.351783	0.376717	0.659935
748	-3.0474	-3.00218	-3.09682	-2.94463	-3.04665	-0.000742197	0.0444758	-0.0501699	0.102023	0.481883	0.531087	0.447826	0.758364
750	-2.96477	-2.93973	-3.01104	-2.89953	-2.97442	0.00965023	0.0346942	-0.0366204	0.0748956	0.530541	0.479448	0.496853	0.661882
752	-2.90634	-2.89406	-2.9852	-2.81876	-2.91656	0.0102201	0.0224988	-0.0686355	0.0978074	0.533209	0.415067	0.381011	0.743371
754	-2.89781	-2.88261	-2.96453	-2.78394	-2.91165	0.0138433	0.0290482	-0.0528815	0.12771	0.550173	0.449642	0.438014	0.849723
756	-2.89948	-2.88483	-2.96967	-2.8115	-2.90455	0.00506854	0.0197177	-0.0651219	0.0930438	0.509089	0.400385	0.393724	0.726428
758	-2.90968	-2.87073	-2.97735	-2.82472	-2.90597	-0.00371003	0.0352464	-0.071378	0.0812495	0.467987	0.482363	0.371087	0.684481
760	-2.94149	-2.91616	-3.01075	-2.86463	-2.95342	0.0119255	0.037256	-0.057337	0.0887887	0.541193	0.492973	0.421892	0.711295
762	-2.97772	-2.95466	-3.03921	-2.90413	-2.98224	0.00452089	0.0275788	-0.0569656	0.0781057	0.506525	0.441885	0.423236	0.673299
764	-3.01285	-2.97047	-3.07777	-2.93455	-3.01724	0.00438404	0.0467658	-0.0605376	0.0826862	0.505884	0.543176	0.410312	0.68959
766	-3.03231	-3.00915	-3.10358	-2.95953	-3.04386	0.0115411	0.0347085	-0.0597198	0.0843287	0.539394	0.479524	0.413271	0.695432
768	-3.03056	-2.99803	-3.09676	-2.97661	-3.0537	0.0231485	0.0556757	-0.0430586	0.0770957	0.59374	0.590213	0.473557	0.669707
770	-3.02506	-2.99656	-3.07693	-2.94588	-3.03661	0.0115545	0.0400503	-0.0403168	0.0907328	0.539456	0.507724	0.483478	0.718209
772	-3.00846	-2.99672	-3.08343	-2.91551	-3.0248	0.0163369	0.0280745	-0.0586283	0.109291	0.561848	0.444502	0.41722	0.784214
774	-2.95922	-2.94615	-3.03667	-2.8835	-2.98132	0.0220947	0.0351641	-0.0553567	0.0978141	0.588806	0.481929	0.429058	0.743394
776	-2.93047	-2.89536	-2.98385	-2.85876	-2.94036	0.00988984	0.0449944	-0.0434878	0.0816014	0.531662	0.533825	0.472004	0.685732
778	-2.86717	-2.83033	-2.92793	-2.78939	-2.87379	0.00661659	0.043457	-0.0541394	0.0843983	0.516337	0.525709	0.433463	0.69568
780	-2.79183	-2.76404	-2.85159	-2.69768	-2.79092	-0.000916481	0.0268798	-0.0606749	0.0932331	0.481067	0.438195	0.409815	0.727102
782	-2.69597	-2.63336	-2.76329	-2.64406	-2.70743	0.0114639	0.0740669	-0.0558612	0.0633712	0.539032	0.687303	0.427232	0.620894
784	-2.60525	-2.58649	-2.68109	-2.53099	-2.62039	0.0151401	0.0339053	-0.0606971	0.0894048	0.556244	0.475283	0.409735	0.713486
786	-2.52504	-2.49425	-2.59661	-2.41888	-2.52732	0.00227666	0.0330677	-0.0692966	0.108438	0.496017	0.470862	0.378619	0.781179
788	-2.41246	-2.38081	-2.49508	-2.33075	-2.41738	0.00491619	0.0365672	-0.0777051	0.0866334	0.508376	0.489336	0.348193	0.703629
790	-2.3261	-2.292	-2.40001	-2.2239	-2.32282	-0.00328064	0.0308163	-0.0771909	0.0989172	0.469998	0.458976	0.350054	0.747318
792	-2.21972	-2.17868	-2.27562	-2.11977	-2.20522	-0.0145001	0.0265329	-0.0703993	0.0854435	0.417468	0.436363	0.374629	0.699397
794	-2.10368	-2.07584	-2.16388	-2.01242	-2.10429	0.000604391	0.028451	-0.0595982	0.0918632	0.488188	0.446489	0.413711	0.722229
796	-1.98093	-1.95776	-2.05795	-1.8897	-1.98594	0.00500822	0.0281774	-0.0720172	0.096235	0.508807	0.445045	0.368774	0.737778
798	-1.87475	-1.83918	-1.95718	-1.77503	-1.87832	0.00357056	0.0391387	-0.078858	0.103293	0.502075	0.502912	0.344022	0.76288
800	-1.76442	-1.73763	-1.84021	-1.70414	-1.78335	0.0189248	0.0457214	-0.0568587	0.0792102	0.573965	0.537663	0.423623	0.677228
Trend Analysis, 500-570 nm
	Absorption					log relative absorption
nm	Acacia	Olive	VM	Eucalyptus	logRWL	Acacia	Olive	VM	Eucalyptus
500	0.386845	0.428584	0.52172	0.705723	2.69897	-0.412463	-0.367964	-0.282563	-0.151366
502	0.578385	0.466813	0.459046	0.650948	2.7007	-0.237783	-0.330857	-0.338144	-0.186454
504	0.599893	0.505425	0.566813	0.846348	2.70243	-0.221926	-0.296343	-0.24656	-0.0724512
506	0.720676	0.792837	0.532641	0.822384	2.70415	-0.14226	-0.100816	-0.273565	-0.0849255
508	0.4553	0.44993	0.59305	0.815751	2.70586	-0.341702	-0.346855	-0.226908	-0.0884424
510	0.47649	0.413092	0.450747	0.773555	2.70757	-0.321947	-0.383954	-0.346067	-0.111509
512	0.510672	0.593501	0.524325	0.76199	2.70927	-0.291858	-0.226579	-0.2804	-0.118051
514	0.594311	0.392824	0.397877	0.632724	2.71096	-0.225986	-0.405802	-0.400252	-0.198786
516	0.49795	0.458576	0.323871	0.895541	2.71265	-0.302814	-0.338589	-0.489628	-0.0479146
518	0.557402	0.591561	0.528771	0.760932	2.71433	-0.253831	-0.228	-0.276733	-0.118654
520	0.649429	0.430649	0.449679	0.688583	2.716	-0.187468	-0.365876	-0.347098	-0.162043
522	0.523197	0.290525	0.422608	0.718552	2.71767	-0.281335	-0.536816	-0.374062	-0.143542
524	0.547894	0.410426	0.397882	0.632921	2.71933	-0.261304	-0.386765	-0.400245	-0.19865
526	0.510354	0.450001	0.43708	0.586708	2.72099	-0.292128	-0.346787	-0.359439	-0.231578
528	0.516047	0.49114	0.438283	0.678694	2.72263	-0.28731	-0.308795	-0.358245	-0.168326
530	0.684229	0.657212	0.504556	0.578638	2.72428	-0.164799	-0.182294	-0.29709	-0.237593
532	0.634444	0.326797	0.470301	0.640215	2.72591	-0.197607	-0.485722	-0.327624	-0.193674
534	0.472987	0.462103	0.466962	0.648814	2.72754	-0.325151	-0.335261	-0.330718	-0.18788
536	0.55153	0.469015	0.516641	0.617225	2.72916	-0.258431	-0.328813	-0.286811	-0.209557
538	0.482547	0.533587	0.471461	0.772219	2.73078	-0.31646	-0.272795	-0.326554	-0.11226
540	0.561665	0.436554	0.4262	0.629592	2.73239	-0.250523	-0.359962	-0.370387	-0.200941
542	0.556355	0.514597	0.40699	0.602954	2.734	-0.254648	-0.288533	-0.390416	-0.219716
544	0.539936	0.512084	0.456571	0.761816	2.7356	-0.267657	-0.290659	-0.340492	-0.11815
546	0.446	0.329145	0.331568	0.673898	2.73719	-0.350665	-0.482612	-0.479427	-0.171406
548	0.526699	0.421902	0.398235	0.662267	2.73878	-0.278437	-0.374788	-0.39986	-0.178967
550	0.597886	0.491681	0.514181	0.903045	2.74036	-0.223382	-0.308316	-0.288884	-0.0442905
552	0.408345	0.496227	0.429853	0.616134	2.74194	-0.388973	-0.304319	-0.36668	-0.210325
554	0.505662	0.471061	0.425691	0.655974	2.74351	-0.29614	-0.326923	-0.370905	-0.183113
556	0.455039	0.444002	0.41275	0.618209	2.74507	-0.341952	-0.352615	-0.384313	-0.208865
558	0.466219	0.378454	0.285948	0.56602	2.74663	-0.33141	-0.421987	-0.543713	-0.247168
560	0.470916	0.427243	0.397039	0.655123	2.74819	-0.327057	-0.369325	-0.401167	-0.183677
562	0.615728	0.548714	0.399449	0.720563	2.74974	-0.210611	-0.260654	-0.398538	-0.142328
564	0.636467	0.593235	0.569256	0.598073	2.75128	-0.196224	-0.226773	-0.244692	-0.223246
566	0.514473	0.465378	0.439476	0.721708	2.75282	-0.288637	-0.332194	-0.357065	-0.141639
568	0.502109	0.538996	0.37756	0.739456	2.75435	-0.299202	-0.268414	-0.423014	-0.131088
570	0.515328	0.415545	0.457146	0.751844	2.75587	-0.287916	-0.381382	-0.339946	-0.123872
	Acacia	Olive	VM	Eucalyptus		Acacia	Olive	VM	Eucalyptus
Slope:	-0.000485371	-0.000345037	-0.00127304	-0.00119622	AAE:	0.402421	0.221751	1.52521	0.908107
Slope SD:	0.000602789	0.000766275	0.000517057	0.000687056	AAE SD:	0.598923	0.838069	0.638379	0.51217

## Sheet: UV-Vis Fresh vs Aged
800 oC									500 oC
Acacia, VOC aged	Euc, VOC aged	Acacia, fresh	Euc, fresh	Negative Acacia, aged	Negative Euca, aged	Acacia diff upon aging	Euc diff upon aging		Acacia, VOC aged	Euc, VOC aged	Acacia, fresh	Euc, fresh	Negative Acacia, aged	Negative Euca, aged	Acacia diff upon aging	Euc diff upon aging
32.0768	-5.44167	-6.67515	-82.3565	-32.0768	5.44167	-38.7519	-76.9149		3.4926	2.47981	1.03669	2.13971	-3.4926	-2.47981	-2.45591	-0.340093
34.2058	-5.92642	-7.08094	-78.4482	-34.2058	5.92642	-41.2867	-72.5217		3.37371	2.42924	1.27189	2.3476	-3.37371	-2.42924	-2.10182	-0.0816339
35.3646	-5.70211	-5.7479	-74.7521	-35.3646	5.70211	-41.1125	-69.05		3.25715	2.39027	1.66747	2.47697	-3.25715	-2.39027	-1.58967	0.0867017
34.088	-5.607	-4.40472	-67.7671	-34.088	5.607	-38.4927	-62.1601		3.0814	2.29424	1.9395	2.61664	-3.0814	-2.29424	-1.1419	0.322401
33.1538	-5.10159	-4.43147	-60.1164	-33.1538	5.10159	-37.5853	-55.0148		2.91873	2.26547	2.0501	2.66602	-2.91873	-2.26547	-0.86863	0.400551
30.8077	-4.80384	-3.46554	-53.652	-30.8077	4.80384	-34.2733	-48.8481		2.79252	2.18663	2.22463	2.64924	-2.79252	-2.18663	-0.567888	0.462609
28.0242	-4.26873	-1.29362	-46.3443	-28.0242	4.26873	-29.3178	-42.0755		2.65001	2.07721	2.41254	2.62017	-2.65001	-2.07721	-0.237477	0.542965
25.7195	-3.57416	-1.0814	-40.7505	-25.7195	3.57416	-26.8009	-37.1763		2.50697	2.03154	2.3957	2.56254	-2.50697	-2.03154	-0.111265	0.530996
23.2888	-2.60431	-0.38738	-35.6976	-23.2888	2.60431	-23.6762	-33.0932		2.41513	1.99755	2.39479	2.48145	-2.41513	-1.99755	-0.0203492	0.4839
20.2978	-2.46586	-0.49231	-30.6305	-20.2978	2.46586	-20.7901	-28.1646		2.25144	1.87804	2.36055	2.41456	-2.25144	-1.87804	0.109104	0.536521
17.5246	-2.00304	0.290392	-25.9439	-17.5246	2.00304	-17.2343	-23.9409		2.09631	1.79575	2.35984	2.34607	-2.09631	-1.79575	0.263522	0.550313
14.763	-1.80821	0.199393	-21.3484	-14.763	1.80821	-14.5636	-19.5402		1.97717	1.71284	2.28849	2.24127	-1.97717	-1.71284	0.311316	0.528437
12.2677	-1.13938	0.513613	-17.5895	-12.2677	1.13938	-11.7541	-16.4502		1.83836	1.6251	2.25207	2.12636	-1.83836	-1.6251	0.413703	0.501265
9.82427	-0.746068	0.3875	-13.3363	-9.82427	0.746068	-9.43677	-12.5902		1.69111	1.54026	2.10889	2.03343	-1.69111	-1.54026	0.417776	0.493171
7.52738	-0.376738	0.604113	-9.72841	-7.52738	0.376738	-6.92327	-9.35167		1.59918	1.4414	2.01502	1.91154	-1.59918	-1.4414	0.415838	0.470135
5.82322	-0.0708104	0.728869	-7.57319	-5.82322	0.0708104	-5.09435	-7.50238		1.49703	1.39149	1.88675	1.78635	-1.49703	-1.39149	0.389712	0.394863
4.36181	0.236622	0.594155	-5.14566	-4.36181	-0.236622	-3.76765	-5.38228		1.40106	1.31224	1.7825	1.66664	-1.40106	-1.31224	0.38144	0.354407
3.19592	0.454857	0.484322	-3.65746	-3.19592	-0.454857	-2.7116	-4.11232		1.32751	1.2502	1.62137	1.53962	-1.32751	-1.2502	0.293862	0.289423
2.19448	0.592371	0.454598	-2.49618	-2.19448	-0.592371	-1.73988	-3.08856		1.24829	1.19907	1.50276	1.42314	-1.24829	-1.19907	0.25447	0.22407
1.6321	0.680165	0.441055	-1.58711	-1.6321	-0.680165	-1.19105	-2.26727		1.19159	1.1592	1.38266	1.3207	-1.19159	-1.1592	0.191063	0.1615
1.17289	0.712857	0.541331	-0.897059	-1.17289	-0.712857	-0.63156	-1.60992		1.14474	1.11439	1.28717	1.23099	-1.14474	-1.11439	0.142429	0.116604
0.75249	0.684253	0.45105	-0.666123	-0.75249	-0.684253	-0.30144	-1.35038		1.0965	1.0784	1.17749	1.15582	-1.0965	-1.0784	0.0809886	0.077425
0.740567	0.768108	0.35745	-0.292748	-0.740567	-0.768108	-0.383118	-1.06086		1.08536	1.04877	1.12413	1.09225	-1.08536	-1.04877	0.0387711	0.0434798
0.633278	0.869924	0.356892	-0.184291	-0.633278	-0.869924	-0.276386	-1.05422		1.05268	1.04527	1.05572	1.05151	-1.05268	-1.04527	0.00304055	0.00624552
0.381893	0.781272	0.271163	0.0996715	-0.381893	-0.781272	-0.110731	-0.681601		1.01727	0.999802	1.03214	1.01591	-1.01727	-0.999802	0.0148684	0.0161066
0.328892	0.679177	0.461736	0.35855	-0.328892	-0.679177	0.132844	-0.320627		0.988058	1.00001	1	1	-0.988058	-1.00001	0.0119457	-4.34534e-06
0.470716	0.919328	0.113204	0.0929071	-0.470716	-0.919328	-0.357512	-0.826421		1.00001	0.994404	0.96759	0.978141	-1.00001	-0.994404	-0.0324173	-0.0162626
0.404806	0.865824	0.267724	0.0742371	-0.404806	-0.865824	-0.137081	-0.791587		0.980753	0.963332	0.95211	0.960859	-0.980753	-0.963332	-0.028643	-0.00247333
0.270363	0.852484	0.0790033	0.102468	-0.270363	-0.852484	-0.19136	-0.750017		0.966692	0.955794	0.929811	0.954415	-0.966692	-0.955794	-0.0368808	-0.00137904
5.20708e-05	0.596717	0.347945	0.351228	-5.20708e-05	-0.596717	0.347893	-0.245489		0.938755	0.936393	0.943199	0.95511	-0.938755	-0.936393	0.00444382	0.0187175
0.256657	0.729806	0.642115	0.0982107	-0.256657	-0.729806	0.385458	-0.631596		0.919583	0.926306	0.963192	0.945543	-0.919583	-0.926306	0.0436089	0.0192371
0.370595	0.92322	0.48723	0.570516	-0.370595	-0.92322	0.116634	-0.352704		0.925799	0.902057	0.930309	0.951358	-0.925799	-0.902057	0.00450962	0.0493006
0.374512	0.900141	0.15866	0.400331	-0.374512	-0.900141	-0.215852	-0.49981		0.891711	0.886128	0.915798	0.942322	-0.891711	-0.886128	0.0240869	0.0561942
0.311604	0.793096	0.637754	0.567065	-0.311604	-0.793096	0.32615	-0.22603		0.86288	0.85571	0.938441	0.946677	-0.86288	-0.85571	0.0755605	0.0909665
0.402777	0.839124	0.298712	0.39106	-0.402777	-0.839124	-0.104066	-0.448064		0.838595	0.842758	0.916822	0.93798	-0.838595	-0.842758	0.0782276	0.0952223
0.260466	0.781013	0.271665	0.5154	-0.260466	-0.781013	0.0111986	-0.265613		0.824645	0.80794	0.918995	0.939286	-0.824645	-0.80794	0.0943502	0.131346
0.426494	0.783932	0.470214	0.436169	-0.426494	-0.783932	0.0437193	-0.347763		0.804586	0.79871	0.902583	0.929492	-0.804586	-0.79871	0.097997	0.130782
0.337731	0.805701	0.428374	0.677911	-0.337731	-0.805701	0.0906433	-0.12779		0.764095	0.760089	0.917308	0.93053	-0.764095	-0.760089	0.153213	0.170441
0.312397	0.641389	0.554031	0.497917	-0.312397	-0.641389	0.241634	-0.143472		0.730972	0.73059	0.904829	0.917727	-0.730972	-0.73059	0.173858	0.187137
0.119688	0.549129	0.167238	0.552648	-0.119688	-0.549129	0.0475497	0.0035194		0.72857	0.712974	0.890849	0.90375	-0.72857	-0.712974	0.162279	0.190776
0.381572	0.71189	0.677599	0.35732	-0.381572	-0.71189	0.296026	-0.354569		0.705061	0.692083	0.88015	0.884973	-0.705061	-0.692083	0.175089	0.19289
0.418563	0.910545	0.549174	0.524762	-0.418563	-0.910545	0.130611	-0.385783		0.69563	0.684051	0.860764	0.879079	-0.69563	-0.684051	0.165134	0.195028
0.326416	0.597547	0.166624	0.485936	-0.326416	-0.597547	-0.159791	-0.111611		0.652523	0.63642	0.834625	0.854434	-0.652523	-0.63642	0.182103	0.218014
0.468724	0.927393	0.367359	0.213253	-0.468724	-0.927393	-0.101364	-0.71414		0.656715	0.654	0.792503	0.830932	-0.656715	-0.654	0.135789	0.176932
0.500444	1.00007	0.348153	0.668767	-0.500444	-1.00007	-0.152291	-0.331299		0.6374	0.636055	0.792809	0.810306	-0.6374	-0.636055	0.155409	0.17425
0.476634	0.584369	0.132891	0.263397	-0.476634	-0.584369	-0.343743	-0.320972		0.591068	0.594189	0.733365	0.780831	-0.591068	-0.594189	0.142297	0.186643
0.562713	0.791467	0.225831	0.238369	-0.562713	-0.791467	-0.336883	-0.553098		0.609745	0.581086	0.706268	0.762903	-0.609745	-0.581086	0.0965229	0.181817
0.414361	0.651841	0.219339	0.708851	-0.414361	-0.651841	-0.195022	0.0570102		0.580962	0.559294	0.707673	0.749316	-0.580962	-0.559294	0.126712	0.190023
0.518286	0.809572	0.512404	0.228922	-0.518286	-0.809572	-0.0058825	-0.58065		0.554172	0.544521	0.698512	0.723981	-0.554172	-0.544521	0.144341	0.17946
0.455553	0.729414	0.347202	0.356664	-0.455553	-0.729414	-0.10835	-0.37275		0.526261	0.532233	0.663884	0.705831	-0.526261	-0.532233	0.137623	0.173597
0.450749	0.756576	0.397477	0.622001	-0.450749	-0.756576	-0.053272	-0.134575		0.50976	0.513805	0.643307	0.694062	-0.50976	-0.513805	0.133547	0.180256
0.45718	0.770336	0.253545	0.333641	-0.45718	-0.770336	-0.203635	-0.436695		0.495304	0.49862	0.62093	0.662796	-0.495304	-0.49862	0.125626	0.164177
0.339927	0.577691	0.221511	0.344749	-0.339927	-0.577691	-0.118416	-0.232942		0.453389	0.463313	0.608849	0.645464	-0.453389	-0.463313	0.155459	0.182151
0.370591	0.528033	0.304594	0.408706	-0.370591	-0.528033	-0.0659972	-0.119327		0.436608	0.452006	0.593447	0.629382	-0.436608	-0.452006	0.156839	0.177376
0.494056	0.65972	0.347367	0.523486	-0.494056	-0.65972	-0.146689	-0.136234		0.428533	0.443775	0.587478	0.613839	-0.428533	-0.443775	0.158944	0.170064
0.557801	0.704054	0.422842	0.306299	-0.557801	-0.704054	-0.134959	-0.397754		0.417532	0.437767	0.548851	0.593496	-0.417532	-0.437767	0.131319	0.155729
0.391101	0.486597	0.317493	0.469792	-0.391101	-0.486597	-0.0736085	-0.0168052		0.402551	0.405368	0.549699	0.572523	-0.402551	-0.405368	0.147148	0.167156
0.304079	0.453007	0.389335	0.541224	-0.304079	-0.453007	0.0852553	0.0882169		0.41051	0.401632	0.535999	0.558527	-0.41051	-0.401632	0.125489	0.156895
0.5259	0.416575	0.309146	3.55661e-05	-0.5259	-0.416575	-0.216754	-0.416539		0.387084	0.388261	0.518746	0.523271	-0.387084	-0.388261	0.131661	0.135011
0.587047	0.614902	0.260629	0.37694	-0.587047	-0.614902	-0.326418	-0.237962		0.37762	0.364874	0.484128	0.523654	-0.37762	-0.364874	0.106508	0.158779
0.472474	0.495761	0.351929	0.718758	-0.472474	-0.495761	-0.120545	0.222997		0.358731	0.369118	0.475984	0.506808	-0.358731	-0.369118	0.117253	0.13769
0.396758	0.441998	0.461502	0.449592	-0.396758	-0.441998	0.0647441	0.00759428		0.333664	0.342918	0.476044	0.491252	-0.333664	-0.342918	0.14238	0.148335
0.660388	0.816837	0.432426	0.596252	-0.660388	-0.816837	-0.227962	-0.220585		0.35094	0.362694	0.447262	0.474277	-0.35094	-0.362694	0.0963214	0.111583
0.566739	0.572477	0.262725	0.467717	-0.566739	-0.572477	-0.304014	-0.10476		0.331483	0.342397	0.427784	0.452835	-0.331483	-0.342397	0.0963007	0.110438
0.490228	0.658464	0.529436	0.477224	-0.490228	-0.658464	0.0392079	-0.181239		0.31249	0.320825	0.416918	0.442873	-0.31249	-0.320825	0.104429	0.122048
0.602535	0.679376	0.27618	0.372404	-0.602535	-0.679376	-0.326355	-0.306972		0.31993	0.306919	0.383625	0.423602	-0.31993	-0.306919	0.0636948	0.116683
0.494962	0.444971	0.529359	0.304085	-0.494962	-0.444971	0.0343971	-0.140885		0.277228	0.27737	0.37301	0.404846	-0.277228	-0.27737	0.0957821	0.127475
0.389312	0.577377	0.40544	0.656626	-0.389312	-0.577377	0.0161277	0.0792493		0.303004	0.289059	0.365533	0.393993	-0.303004	-0.289059	0.062529	0.104934
0.501798	0.516537	0.450398	0.869773	-0.501798	-0.516537	-0.0513996	0.353236		0.272026	0.277644	0.333305	0.38455	-0.272026	-0.277644	0.0612793	0.106905
0.573179	0.718819	0.420906	0.643825	-0.573179	-0.718819	-0.152272	-0.0749942		0.293384	0.270527	0.329144	0.360489	-0.293384	-0.270527	0.0357608	0.0899616
0.382612	0.700245	0.464257	0.609262	-0.382612	-0.700245	0.0816449	-0.0909826		0.270861	0.266315	0.317242	0.344705	-0.270861	-0.266315	0.0463805	0.07839
0.551562	0.524659	0.506411	0.640658	-0.551562	-0.524659	-0.0451512	0.115999		0.257019	0.241678	0.297505	0.333119	-0.257019	-0.241678	0.0404862	0.091441
0.841693	0.865303	0.208919	0.508048	-0.841693	-0.865303	-0.632773	-0.357255		0.254795	0.270301	0.277381	0.314697	-0.254795	-0.270301	0.0225867	0.0443961
0.627637	0.585436	0.553948	0.814998	-0.627637	-0.585436	-0.073689	0.229562		0.240183	0.247863	0.285757	0.309195	-0.240183	-0.247863	0.0455741	0.0613325
0.570635	0.620111	0.361774	0.581237	-0.570635	-0.620111	-0.208861	-0.0388743		0.224658	0.213369	0.265826	0.295367	-0.224658	-0.213369	0.0411676	0.0819972
0.42228	0.309134	0.31958	0.504156	-0.42228	-0.309134	-0.1027	0.195022		0.225718	0.220563	0.245062	0.280515	-0.225718	-0.220563	0.0193439	0.0599526
0.564735	0.593528	0.497738	0.361392	-0.564735	-0.593528	-0.0669973	-0.232136		0.211619	0.209175	0.255159	0.263394	-0.211619	-0.209175	0.0435395	0.0542186
0.471764	0.236021	0.594448	0.534473	-0.471764	-0.236021	0.122684	0.298452		0.197079	0.177323	0.235767	0.258011	-0.197079	-0.177323	0.0386883	0.0806888
0.526108	0.477305	0.163748	0.814713	-0.526108	-0.477305	-0.36236	0.337407		0.198494	0.205186	0.209825	0.258818	-0.198494	-0.205186	0.0113314	0.053632
0.613227	0.546187	0.480342	0.618177	-0.613227	-0.546187	-0.132884	0.0719904		0.202599	0.195089	0.226561	0.240211	-0.202599	-0.195089	0.0239623	0.0451225
0.67412	0.653921	0.672213	0.826956	-0.67412	-0.653921	-0.0019067	0.173035		0.198608	0.193841	0.22467	0.234097	-0.198608	-0.193841	0.0260617	0.0402562
0.450741	0.359708	0.138669	0.517186	-0.450741	-0.359708	-0.312072	0.157478		0.183181	0.159606	0.188431	0.211257	-0.183181	-0.159606	0.00524994	0.0516509
0.628053	0.60421	0.423122	0.60379	-0.628053	-0.60421	-0.204931	-0.00042022		0.16368	0.159237	0.181715	0.205536	-0.16368	-0.159237	0.0180352	0.0462988
0.727671	0.738771	0.346791	0.65688	-0.727671	-0.738771	-0.38088	-0.0818903		0.171675	0.180498	0.189269	0.196438	-0.171675	-0.180498	0.0175934	0.0159392
0.762733	0.468603	0.340474	0.654585	-0.762733	-0.468603	-0.422258	0.185982		0.162901	0.170462	0.171114	0.188027	-0.162901	-0.170462	0.00821309	0.0175655
0.22887	0.328728	0.486441	0.375917	-0.22887	-0.328728	0.257571	0.0471893		0.173167	0.142598	0.163604	0.176882	-0.173167	-0.142598	-0.00956354	0.0342842
0.795562	0.660626	0.859617	0.842224	-0.795562	-0.660626	0.0640547	0.181598		0.158183	0.154085	0.203977	0.174863	-0.158183	-0.154085	0.0457934	0.0207774
0.34716	0.0470636	0.276815	0.661097	-0.34716	-0.0470636	-0.0703451	0.614034		0.124054	0.0902329	0.154416	0.158459	-0.124054	-0.0902329	0.0303617	0.0682265
0.772292	0.727061	0.406186	0.873619	-0.772292	-0.727061	-0.366106	0.146558		0.167557	0.150521	0.148528	0.159736	-0.167557	-0.150521	-0.0190293	0.00921523
0.516266	0.305409	0.234991	0.715968	-0.516266	-0.305409	-0.281275	0.410558		0.126734	0.133274	0.152044	0.141407	-0.126734	-0.133274	0.0253107	0.00813284
0.730547	0.385283	0.595211	0.815505	-0.730547	-0.385283	-0.135336	0.430222		0.147161	0.143675	0.163505	0.146713	-0.147161	-0.143675	0.0163441	0.00303839
0.650733	0.48556	0.53015	0.724345	-0.650733	-0.48556	-0.120583	0.238785		0.135383	0.124998	0.131484	0.127864	-0.135383	-0.124998	-0.00389926	0.00286561
0.717325	0.479595	0.219323	0.820637	-0.717325	-0.479595	-0.498001	0.341042		0.111831	0.12595	0.142652	0.113681	-0.111831	-0.12595	0.0308206	-0.0122697
0.735908	0.646477	0.536005	0.88163	-0.735908	-0.646477	-0.199903	0.235153		0.140359	0.131489	0.133534	0.120231	-0.140359	-0.131489	-0.00682515	-0.011258
0.649811	0.535604	4.68203e-05	0.632437	-0.649811	-0.535604	-0.649765	0.0968328		0.145556	0.129753	0.0970175	0.107888	-0.145556	-0.129753	-0.0485387	-0.0218657
0.773008	0.439633	0.608504	0.725405	-0.773008	-0.439633	-0.164504	0.285772		0.115244	0.104774	0.131105	0.106906	-0.115244	-0.104774	0.0158607	0.00213174
0.553327	0.45479	0.527058	0.886159	-0.553327	-0.45479	-0.0262689	0.43137		0.11052	0.101607	0.100171	0.106441	-0.11052	-0.101607	-0.0103496	0.00483405
0.428855	0.591877	0.458068	0.715553	-0.428855	-0.591877	0.0292124	0.123676		0.10682	0.093025	0.111613	0.0941867	-0.10682	-0.093025	0.00479342	0.00116166
0.598567	0.449671	0.33293	0.528454	-0.598567	-0.449671	-0.265636	0.0787834		0.112571	0.116525	0.0906418	0.0822586	-0.112571	-0.116525	-0.0219288	-0.0342666
0.663352	0.334997	0.454527	0.477452	-0.663352	-0.334997	-0.208824	0.142455		0.0723398	0.0958323	0.116738	0.0911158	-0.0723398	-0.0958323	0.0443983	-0.00471648
0.717601	0.633783	0.271761	0.505567	-0.717601	-0.633783	-0.44584	-0.128217		0.108491	0.113727	0.0720448	0.0727495	-0.108491	-0.113727	-0.0364458	-0.0409772
0.51032	0.221406	1.00005	0.666502	-0.51032	-0.221406	0.489727	0.445095		0.0936811	0.101615	0.110115	0.0812697	-0.0936811	-0.101615	0.016434	-0.0203457
0.804017	0.643738	0.826502	0.958579	-0.804017	-0.643738	0.0224852	0.314841		0.114917	0.121231	0.117439	0.0800234	-0.114917	-0.121231	0.00252278	-0.0412074
0.687246	0.460091	0.852913	0.895508	-0.687246	-0.460091	0.165667	0.435417		0.0935084	0.0942929	0.124375	0.0788042	-0.0935084	-0.0942929	0.0308662	-0.0154888
0.55728	0.29043	0.695935	0.849093	-0.55728	-0.29043	0.138655	0.558663		0.106724	0.0862383	0.0790785	0.072712	-0.106724	-0.0862383	-0.0276458	-0.0135264
0.385941	6.57461e-05	0.534415	0.791346	-0.385941	-6.57461e-05	0.148474	0.79128		0.0445813	0.038613	0.0869496	0.065495	-0.0445813	-0.038613	0.0423683	0.026882
0.564982	0.333099	0.563609	1.00004	-0.564982	-0.333099	-0.00137303	0.666937		0.0934209	0.0777907	0.0632813	0.0701491	-0.0934209	-0.0777907	-0.0301396	-0.00764159
0.741985	0.576881	0.75624	0.87909	-0.741985	-0.576881	0.0142558	0.302208		0.106859	0.0911437	0.0966771	0.0663299	-0.106859	-0.0911437	-0.0101815	-0.0248137
0.688448	0.440956	0.497139	0.481375	-0.688448	-0.440956	-0.19131	0.0404183		0.0855511	0.076962	0.0636995	0.0567185	-0.0855511	-0.076962	-0.0218516	-0.0202435
0.529734	0.359835	0.689515	0.911723	-0.529734	-0.359835	0.159781	0.551888		0.0891643	0.0756958	0.0720472	0.0590695	-0.0891643	-0.0756958	-0.0171171	-0.0166263
0.311314	0.0789679	0.381741	0.502317	-0.311314	-0.0789679	0.0704272	0.423349		0.0790447	0.050446	0.0605183	0.0515122	-0.0790447	-0.050446	-0.0185264	0.00106625
0.43285	0.270691	0.632297	0.48685	-0.43285	-0.270691	0.199447	0.216159		0.065314	0.0470434	0.0874616	0.0477967	-0.065314	-0.0470434	0.0221476	0.000753264
0.59655	0.333096	0.553437	0.577803	-0.59655	-0.333096	-0.0431128	0.244707		0.070611	0.0596761	0.0583341	0.0520668	-0.070611	-0.0596761	-0.0122769	-0.00760926
0.581727	0.180759	0.755436	0.938839	-0.581727	-0.180759	0.173709	0.75808		0.0680751	0.0625	0.0709751	0.0538685	-0.0680751	-0.0625	0.00289998	-0.00863149
0.660885	0.372181	0.621387	0.612873	-0.660885	-0.372181	-0.0394978	0.240692		0.0799479	0.0699248	0.0747292	0.0532386	-0.0799479	-0.0699248	-0.00521873	-0.0166862
0.669076	0.285232	0.640294	0.518737	-0.669076	-0.285232	-0.0287819	0.233505		0.0683118	0.0462613	0.045738	0.0461929	-0.0683118	-0.0462613	-0.0225737	-6.83689e-05
0.650707	0.482455	0.720721	0.917332	-0.650707	-0.482455	0.070014	0.434877		0.0802508	0.0794047	0.0648775	0.0514127	-0.0802508	-0.0794047	-0.0153734	-0.0279919
0.825078	0.747001	0.658502	0.731534	-0.825078	-0.747001	-0.166576	-0.0154667		0.0847501	0.0944126	0.0673539	0.0476361	-0.0847501	-0.0944126	-0.0173963	-0.0467765
0.752649	0.650474	0.484902	0.647662	-0.752649	-0.650474	-0.267747	-0.00281145		0.101668	0.071258	0.0624568	0.0413564	-0.101668	-0.071258	-0.0392115	-0.0299015
0.567945	0.566354	0.552471	0.750458	-0.567945	-0.566354	-0.015474	0.184104		0.0967459	0.0741641	0.0594531	0.0459406	-0.0967459	-0.0741641	-0.0372927	-0.0282235
0.352762	0.456206	0.418083	0.59564	-0.352762	-0.456206	0.065321	0.139434		0.0853756	0.0515126	0.0446547	0.0386578	-0.0853756	-0.0515126	-0.0407209	-0.0128549
0.497805	0.478973	0.472738	0.393595	-0.497805	-0.478973	-0.0250675	-0.0853782		0.0797319	0.0641316	0.0620847	0.0289632	-0.0797319	-0.0641316	-0.0176472	-0.0351684
0.566487	0.409698	0.639468	0.709056	-0.566487	-0.409698	0.0729808	0.299358		0.0622238	0.0589633	0.0598843	0.0433246	-0.0622238	-0.0589633	-0.00233951	-0.0156386
0.638253	0.41262	0.298744	0.61674	-0.638253	-0.41262	-0.33951	0.20412		0.054545	0.0618365	0.0353715	0.0401328	-0.054545	-0.0618365	-0.0191734	-0.0217038
0.74005	0.520367	0.453642	0.598245	-0.74005	-0.520367	-0.286408	0.0778781		0.0682547	0.0555723	0.0444673	0.0390929	-0.0682547	-0.0555723	-0.0237874	-0.0164794
0.846003	0.578449	0.46177	0.571651	-0.846003	-0.578449	-0.384233	-0.00679801		0.077316	0.0746437	0.0546574	0.0388579	-0.077316	-0.0746437	-0.0226586	-0.0357858
0.665165	0.571487	0.458272	0.648264	-0.665165	-0.571487	-0.206893	0.0767764		0.0880761	0.0481833	0.0454858	0.0399479	-0.0880761	-0.0481833	-0.0425904	-0.00823534
0.62921	0.626325	0.464283	0.562444	-0.62921	-0.626325	-0.164927	-0.0638812		0.0517354	0.064716	0.0591071	0.0393252	-0.0517354	-0.064716	0.00737167	-0.0253908
0.711806	0.550541	0.665612	0.737757	-0.711806	-0.550541	-0.0461946	0.187216		0.0643274	0.0644499	0.0597351	0.0410395	-0.0643274	-0.0644499	-0.00459223	-0.0234104
0.833294	0.647466	0.817105	0.839197	-0.833294	-0.647466	-0.016189	0.19173		0.0523779	0.0538294	0.0627144	0.0370762	-0.0523779	-0.0538294	0.0103365	-0.0167532
0.461968	0.506114	0.55714	0.665489	-0.461968	-0.506114	0.0951724	0.159375		0.0699324	0.0684568	0.0515537	0.0329122	-0.0699324	-0.0684568	-0.0183787	-0.0355446
0.585589	0.659714	0.534309	0.907121	-0.585589	-0.659714	-0.0512794	0.247408		0.0702697	0.0450484	0.0445087	0.0375369	-0.0702697	-0.0450484	-0.025761	-0.00751157
0.644102	0.26748	0.697934	0.816594	-0.644102	-0.26748	0.0538311	0.549115		0.0384537	0.0275508	0.0463666	0.0352582	-0.0384537	-0.0275508	0.00791289	0.00770739
0.712302	0.449372	0.315736	0.604092	-0.712302	-0.449372	-0.396566	0.15472		0.0425231	0.0335376	0.0269616	0.0329241	-0.0425231	-0.0335376	-0.0155615	-0.000613531
0.804986	0.526744	0.326671	0.602519	-0.804986	-0.526744	-0.478315	0.0757754		0.0804369	0.0689192	0.048755	0.0320779	-0.0804369	-0.0689192	-0.0316819	-0.0368413
0.989496	0.607491	0.179872	0.413943	-0.989496	-0.607491	-0.809624	-0.193548		0.0781247	0.0769432	0.0306917	0.0201606	-0.0781247	-0.0769432	-0.047433	-0.0567826
0.760128	0.605462	0.501028	0.660214	-0.760128	-0.605462	-0.2591	0.0547525		0.0763057	0.0707526	0.0192031	0.0349008	-0.0763057	-0.0707526	-0.0571027	-0.0358518
0.654975	0.430309	0.369923	0.734373	-0.654975	-0.430309	-0.285052	0.304064		0.060379	0.0527581	0.0287906	0.0272894	-0.060379	-0.0527581	-0.0315884	-0.0254687
0.871754	0.682933	0.715657	0.438776	-0.871754	-0.682933	-0.156096	-0.244157		0.0588067	0.0690708	0.0445069	0.0286888	-0.0588067	-0.0690708	-0.0142997	-0.040382
0.667789	0.547067	0.458194	0.711345	-0.667789	-0.547067	-0.209596	0.164278		0.0637351	0.0556081	0.0423247	0.0295712	-0.0637351	-0.0556081	-0.0214104	-0.0260369
0.692385	0.409061	0.47468	0.6298	-0.692385	-0.409061	-0.217705	0.220739		0.0618794	0.0414741	0.0380649	0.0313757	-0.0618794	-0.0414741	-0.0238145	-0.0100984
0.682702	0.477268	0.382094	0.595027	-0.682702	-0.477268	-0.300609	0.11776		0.055342	0.0385277	0.0212698	0.0276221	-0.055342	-0.0385277	-0.0340721	-0.0109056
0.899646	0.680433	0.594514	0.67119	-0.899646	-0.680433	-0.305132	-0.00924312		0.0771689	0.0761607	0.0329838	0.0312848	-0.0771689	-0.0761607	-0.0441851	-0.0448759
0.667967	0.440273	0.670515	0.73534	-0.667967	-0.440273	0.00254798	0.295068		0.0523082	0.0483139	0.0291817	0.0281732	-0.0523082	-0.0483139	-0.0231265	-0.0201406
0.720395	0.464098	0.699399	0.749632	-0.720395	-0.464098	-0.0209966	0.285534		0.0606662	0.0545614	0.0492531	0.0366011	-0.0606662	-0.0545614	-0.0114131	-0.0179603
0.688925	0.417529	0.748974	0.881711	-0.688925	-0.417529	0.0600486	0.464182		0.047544	0.0507216	0.0502675	0.0339343	-0.047544	-0.0507216	0.00272352	-0.0167873
0.800387	0.497786	0.671188	0.631958	-0.800387	-0.497786	-0.129199	0.134172		0.0430006	0.0368145	0.036039	0.0301639	-0.0430006	-0.0368145	-0.00696163	-0.00665059
0.445944	0.421608	0.329468	0.590967	-0.445944	-0.421608	-0.116475	0.169359		0.0542816	0.0471662	0.039471	0.0243729	-0.0542816	-0.0471662	-0.0148106	-0.0227933
0.811029	0.388881	0.663883	0.547829	-0.811029	-0.388881	-0.147146	0.158948		0.0652284	0.0610176	0.0209251	0.0245432	-0.0652284	-0.0610176	-0.0443034	-0.0364744
0.917702	0.829337	0.647274	0.684811	-0.917702	-0.829337	-0.270428	-0.144526		0.0553673	0.0452715	0.0387652	0.0271419	-0.0553673	-0.0452715	-0.0166021	-0.0181297
0.73385	0.452505	0.386845	0.705723	-0.73385	-0.452505	-0.347006	0.253218		0.0395983	0.0411232	0.0221981	0.023771	-0.0395983	-0.0411232	-0.0174003	-0.0173522
0.591166	0.279034	0.578385	0.650948	-0.591166	-0.279034	-0.0127812	0.371914		0.0203301	0.0214901	0.0389387	0.0253622	-0.0203301	-0.0214901	0.0186086	0.00387208
1.00005	0.714612	0.599893	0.846348	-1.00005	-0.714612	-0.400159	0.131736		0.0699638	0.0701405	0.0372465	0.0234993	-0.0699638	-0.0701405	-0.0327172	-0.0466412
0.802157	0.412205	0.720676	0.822384	-0.802157	-0.412205	-0.081481	0.410179		0.0528571	0.0333872	0.0320994	0.0243361	-0.0528571	-0.0333872	-0.0207577	-0.00905108
0.900749	0.454059	0.4553	0.815751	-0.900749	-0.454059	-0.445449	0.361692		0.0525403	0.0342137	0.030099	0.0195745	-0.0525403	-0.0342137	-0.0224413	-0.0146392
0.655823	0.369999	0.47649	0.773555	-0.655823	-0.369999	-0.179334	0.403556		0.046819	0.0243	0.0341739	0.0219064	-0.046819	-0.0243	-0.0126452	-0.00239363
0.642254	0.536545	0.510672	0.76199	-0.642254	-0.536545	-0.131582	0.225445		0.0503808	0.0412272	0.0291145	0.0209	-0.0503808	-0.0412272	-0.0212663	-0.0203273
0.702055	0.281657	0.594311	0.632724	-0.702055	-0.281657	-0.107744	0.351066		0.0223334	0.021636	0.0193712	0.0189706	-0.0223334	-0.021636	-0.00296221	-0.00266536
0.741293	0.322188	0.49795	0.895541	-0.741293	-0.322188	-0.243343	0.573353		0.0420714	0.032543	0.034362	0.0227382	-0.0420714	-0.032543	-0.00770935	-0.00980481
0.894635	0.655293	0.557402	0.760932	-0.894635	-0.655293	-0.337233	0.105639		0.0564228	0.0444714	0.020528	0.0186243	-0.0564228	-0.0444714	-0.0358949	-0.0258471
0.811458	0.534986	0.649429	0.688583	-0.811458	-0.534986	-0.162029	0.153598		0.0505924	0.0186877	0.0326958	0.015499	-0.0505924	-0.0186877	-0.0178966	-0.00318873
0.707956	0.429723	0.523197	0.718552	-0.707956	-0.429723	-0.184759	0.288829		0.0539696	0.0244925	0.0117123	0.0141461	-0.0539696	-0.0244925	-0.0422573	-0.0103464
0.81353	0.415686	0.547894	0.632921	-0.81353	-0.415686	-0.265636	0.217235		0.0568798	0.0455522	0.0226491	0.016345	-0.0568798	-0.0455522	-0.0342307	-0.0292072
0.783556	0.4487	0.510354	0.586708	-0.783556	-0.4487	-0.273202	0.138007		0.0559286	0.0386206	0.0232881	0.0137562	-0.0559286	-0.0386206	-0.0326406	-0.0248644
0.636058	0.608146	0.516047	0.678694	-0.636058	-0.608146	-0.120011	0.0705483		0.0596365	0.0511247	0.0263904	0.0158456	-0.0596365	-0.0511247	-0.0332461	-0.0352791
0.753812	0.506645	0.684229	0.578638	-0.753812	-0.506645	-0.0695833	0.0719931		0.0341454	0.0333194	0.0361118	0.0116338	-0.0341454	-0.0333194	0.0019664	-0.0216856
0.837086	0.623454	0.634444	0.640215	-0.837086	-0.623454	-0.202643	0.0167609		0.0582806	0.0446256	0.0212679	0.0141869	-0.0582806	-0.0446256	-0.0370127	-0.0304387
0.701315	0.43573	0.472987	0.648814	-0.701315	-0.43573	-0.228328	0.213083		0.0467275	0.0321267	0.0181771	0.0140564	-0.0467275	-0.0321267	-0.0285505	-0.0180703
0.67633	0.417972	0.55153	0.617225	-0.67633	-0.417972	-0.124801	0.199253		0.0518372	0.0352274	0.0257403	0.0164617	-0.0518372	-0.0352274	-0.0260969	-0.0187656
0.888083	0.65786	0.482547	0.772219	-0.888083	-0.65786	-0.405535	0.114359		0.0672151	0.0511278	0.0284356	0.0121516	-0.0672151	-0.0511278	-0.0387795	-0.0389762
0.856719	0.688794	0.561665	0.629592	-0.856719	-0.688794	-0.295054	-0.0592024		0.0437765	0.0396811	0.0192798	0.0137044	-0.0437765	-0.0396811	-0.0244967	-0.0259767
0.788885	0.524773	0.556355	0.602954	-0.788885	-0.524773	-0.23253	0.0781814		0.0555263	0.0335293	0.0196823	0.0125806	-0.0555263	-0.0335293	-0.035844	-0.0209487
0.799583	0.660549	0.539936	0.761816	-0.799583	-0.660549	-0.259646	0.101268		0.0585788	0.0475598	0.0230843	0.0114295	-0.0585788	-0.0475598	-0.0354945	-0.0361303
0.858405	0.413405	0.446	0.673898	-0.858405	-0.413405	-0.412405	0.260493		0.031046	0.0476322	0.0143631	0.00972647	-0.031046	-0.0476322	-0.0166829	-0.0379058
0.84618	0.370221	0.526699	0.662267	-0.84618	-0.370221	-0.319481	0.292046		0.0526807	0.037523	0.0160371	0.0121018	-0.0526807	-0.037523	-0.0366435	-0.0254212
0.77532	0.411778	0.597886	0.903045	-0.77532	-0.411778	-0.177434	0.491267		0.0340835	0.0341338	0.0245165	0.0181763	-0.0340835	-0.0341338	-0.00956698	-0.0159575
0.753484	0.560165	0.408345	0.616134	-0.753484	-0.560165	-0.345139	0.0559693		0.048172	0.0341751	0.014831	0.00975622	-0.048172	-0.0341751	-0.0333409	-0.0244188
0.731722	0.470016	0.505662	0.655974	-0.731722	-0.470016	-0.22606	0.185959		0.0459506	0.0360702	0.0224847	0.00737033	-0.0459506	-0.0360702	-0.0234659	-0.0286999
0.7606	0.519797	0.455039	0.618209	-0.7606	-0.519797	-0.305561	0.0984118		0.0409054	0.0539349	0.0167614	0.00726874	-0.0409054	-0.0539349	-0.024144	-0.0466661
0.811749	0.643791	0.466219	0.56602	-0.811749	-0.643791	-0.345531	-0.0777709		0.0273649	0.0305804	0.0121815	0.00893974	-0.0273649	-0.0305804	-0.0151834	-0.0216407
0.698345	0.435649	0.470916	0.655123	-0.698345	-0.435649	-0.227429	0.219475		0.0388377	0.0236233	0.0089552	0.00678669	-0.0388377	-0.0236233	-0.0298825	-0.0168366
0.747797	0.596923	0.615728	0.720563	-0.747797	-0.596923	-0.132069	0.12364		0.0551663	0.0554606	0.0241583	0.00903249	-0.0551663	-0.0554606	-0.031008	-0.0464281
0.805285	0.534814	0.636467	0.598073	-0.805285	-0.534814	-0.168818	0.0632597		0.0500902	0.0397853	0.0206697	0.00646571	-0.0500902	-0.0397853	-0.0294205	-0.0333196
0.758431	0.607238	0.514473	0.721708	-0.758431	-0.607238	-0.243958	0.11447		0.0563655	0.0540733	0.0187754	0.00647502	-0.0563655	-0.0540733	-0.03759	-0.0475983
0.827858	0.587851	0.502109	0.739456	-0.827858	-0.587851	-0.325749	0.151605		0.0563943	0.040605	0.0124479	0.00968478	-0.0563943	-0.040605	-0.0439465	-0.0309202
0.653169	0.403645	0.515328	0.751844	-0.653169	-0.403645	-0.137841	0.348199		0.0334517	0.0399518	0.0197074	0.00836449	-0.0334517	-0.0399518	-0.0137444	-0.0315873
0.799645	0.709953	0.603008	0.741202	-0.799645	-0.709953	-0.196638	0.0312485		0.0582018	0.0558687	0.018876	0.00969063	-0.0582018	-0.0558687	-0.0393258	-0.0461781
0.712421	0.5069	0.513485	0.695664	-0.712421	-0.5069	-0.198935	0.188763		0.0483251	0.0361164	0.0130882	0.0074796	-0.0483251	-0.0361164	-0.0352369	-0.0286368
0.804073	0.566913	0.482429	0.629934	-0.804073	-0.566913	-0.321643	0.0630208		0.0486141	0.0464	0.0124396	0.00837097	-0.0486141	-0.0464	-0.0361746	-0.038029
0.726116	0.518668	0.593819	0.734804	-0.726116	-0.518668	-0.132297	0.216136		0.0553518	0.0381498	0.0231733	0.011032	-0.0553518	-0.0381498	-0.0321785	-0.0271178
0.707763	0.56822	0.584596	0.721023	-0.707763	-0.56822	-0.123167	0.152803		0.0515031	0.043693	0.0200599	0.00982294	-0.0515031	-0.043693	-0.0314432	-0.03387
0.650254	0.417356	0.600681	0.704728	-0.650254	-0.417356	-0.0495735	0.287372		0.0311221	0.0336987	0.0191415	0.00971278	-0.0311221	-0.0336987	-0.0119806	-0.0239859
0.786969	0.574262	0.555646	0.715858	-0.786969	-0.574262	-0.231323	0.141597		0.0478051	0.0476373	0.0155091	0.00906082	-0.0478051	-0.0476373	-0.032296	-0.0385764
0.779411	0.367522	0.580717	0.760577	-0.779411	-0.367522	-0.198694	0.393055		0.0344972	0.0277946	0.0189831	0.00875315	-0.0344972	-0.0277946	-0.0155141	-0.0190414
0.77102	0.562402	0.51778	0.744731	-0.77102	-0.562402	-0.25324	0.182328		0.0502042	0.0456346	0.0158683	0.00834018	-0.0502042	-0.0456346	-0.0343359	-0.0372944
0.72243	0.471105	0.580449	0.654701	-0.72243	-0.471105	-0.141981	0.183596		0.0386936	0.0396721	0.0172045	0.00537479	-0.0386936	-0.0396721	-0.021489	-0.0342973
0.742703	0.507889	0.517903	0.698881	-0.742703	-0.507889	-0.2248	0.190992		0.0336448	0.0307878	0.0171242	0.00690788	-0.0336448	-0.0307878	-0.0165206	-0.0238799
0.731419	0.558239	0.546315	0.695366	-0.731419	-0.558239	-0.185104	0.137127		0.0402163	0.0390085	0.0223311	0.00882603	-0.0402163	-0.0390085	-0.0178851	-0.0301825
0.67227	0.456578	0.577264	0.733696	-0.67227	-0.456578	-0.0950062	0.277118		0.043841	0.0311188	0.0215316	0.00708327	-0.043841	-0.0311188	-0.0223094	-0.0240356
0.765839	0.560505	0.606949	0.569076	-0.765839	-0.560505	-0.15889	0.00857161		0.0306326	0.0317717	0.0217412	0.00531286	-0.0306326	-0.0317717	-0.00889131	-0.0264589
0.684116	0.447536	0.370848	0.721158	-0.684116	-0.447536	-0.313268	0.273622		0.0346553	0.027047	0.0121849	0.00726572	-0.0346553	-0.027047	-0.0224705	-0.0197813
0.780897	0.478494	0.489378	0.733547	-0.780897	-0.478494	-0.291519	0.255053		0.039994	0.0406355	0.0122892	0.00706443	-0.039994	-0.0406355	-0.0277048	-0.0335711
0.708656	0.421687	0.57676	0.680502	-0.708656	-0.421687	-0.131895	0.258815		0.0271668	0.0271561	0.0170165	0.00693469	-0.0271668	-0.0271561	-0.0101503	-0.0202214
0.77596	0.531188	0.516475	0.68182	-0.77596	-0.531188	-0.259485	0.150632		0.0340484	0.0275004	0.0170673	0.00674401	-0.0340484	-0.0275004	-0.0169811	-0.0207564
0.867544	0.616257	0.543076	0.773372	-0.867544	-0.616257	-0.324468	0.157115		0.0557048	0.029275	0.0148096	0.00799949	-0.0557048	-0.029275	-0.0408952	-0.0212755
0.893707	0.529568	0.517074	0.683742	-0.893707	-0.529568	-0.376634	0.154174		0.0339594	0.0312056	0.0180855	0.00648115	-0.0339594	-0.0312056	-0.015874	-0.0247245
0.810985	0.313255	0.638266	0.741371	-0.810985	-0.313255	-0.172719	0.428116		0.0306502	0.0222376	0.0210654	0.00733682	-0.0306502	-0.0222376	-0.0095848	-0.0149008
0.803033	0.508803	0.544471	0.749167	-0.803033	-0.508803	-0.258562	0.240364		0.0275668	0.0232773	0.0114573	0.00715325	-0.0275668	-0.0232773	-0.0161094	-0.016124
0.677855	0.379742	0.607763	0.791219	-0.677855	-0.379742	-0.0700918	0.411477		0.0436399	0.0216037	0.0176653	0.0077693	-0.0436399	-0.0216037	-0.0259746	-0.0138344
0.7629	0.402141	0.446465	0.713101	-0.7629	-0.402141	-0.316435	0.310961		0.0330164	0.0340022	0.0150844	0.00357644	-0.0330164	-0.0340022	-0.017932	-0.0304258
0.641413	0.1678	0.545218	0.733854	-0.641413	-0.1678	-0.0961954	0.566053		0.00804162	5.45441e-06	0.0201376	0.00524827	-0.00804162	-5.45441e-06	0.012096	0.00524281
0.831464	0.52079	0.425614	0.754252	-0.831464	-0.52079	-0.40585	0.233462		0.0389837	0.0232462	0.00989363	0.00594706	-0.0389837	-0.0232462	-0.0290901	-0.0172991
0.944833	0.581088	0.572195	0.752379	-0.944833	-0.581088	-0.372637	0.171291		0.0348736	0.0368153	0.0221389	0.00713482	-0.0348736	-0.0368153	-0.0127347	-0.0296805
0.810278	0.487737	0.534539	0.735862	-0.810278	-0.487737	-0.275739	0.248125		0.0462286	0.0244688	0.0130474	0.00541369	-0.0462286	-0.0244688	-0.0331812	-0.0190551
0.754206	0.502854	0.530383	0.82947	-0.754206	-0.502854	-0.223822	0.326616		0.0279169	0.0222176	0.0218471	0.00886426	-0.0279169	-0.0222176	-0.00606978	-0.0133534
0.445866	0.24364	0.413867	0.709522	-0.445866	-0.24364	-0.0319987	0.465882		0.0326323	0.0258141	0.00946766	0.00451974	-0.0326323	-0.0258141	-0.0231646	-0.0212944
0.743728	0.359513	0.464112	0.448662	-0.743728	-0.359513	-0.279616	0.0891482		0.0250453	0.029945	0.0110643	1.10907e-06	-0.0250453	-0.029945	-0.013981	-0.0299439
0.828502	0.414029	0.571657	0.701081	-0.828502	-0.414029	-0.256844	0.287052		0.0299635	0.0199361	0.0102996	0.00516282	-0.0299635	-0.0199361	-0.019664	-0.0147732
0.898556	0.512033	0.583186	0.780643	-0.898556	-0.512033	-0.315371	0.26861		0.0474136	0.0284034	0.00823939	0.00822629	-0.0474136	-0.0284034	-0.0391742	-0.0201771
0.804371	0.322694	0.505998	0.686682	-0.804371	-0.322694	-0.298373	0.363988		0.02131	0.0206781	0.0151908	0.00425549	-0.02131	-0.0206781	-0.00611924	-0.0164226
0.76966	0.230442	0.549868	0.637947	-0.76966	-0.230442	-0.219792	0.407505		6.971e-06	0.0102236	0.013109	0.0055349	-6.971e-06	-0.0102236	0.0131021	-0.00468874
0.705195	0.238289	0.439304	0.635332	-0.705195	-0.238289	-0.265891	0.397043		0.0143706	0.0104052	0.00628114	0.00449227	-0.0143706	-0.0104052	-0.00808948	-0.00591289
0.968648	0.773945	0.475079	0.610956	-0.968648	-0.773945	-0.493569	-0.16299		0.0428695	0.0368155	0.0127968	0.00443629	-0.0428695	-0.0368155	-0.0300727	-0.0323792
0.756734	0.354483	0.466057	0.616335	-0.756734	-0.354483	-0.290676	0.261853		0.00815221	0.00351984	0.0106274	0.00290687	-0.00815221	-0.00351984	0.00247517	-0.000612975
0.972436	0.672912	0.582053	0.705142	-0.972436	-0.672912	-0.390383	0.0322308		0.0444899	0.0353413	0.0140716	0.00606632	-0.0444899	-0.0353413	-0.0304182	-0.029275
0.807783	0.405929	0.659252	0.661257	-0.807783	-0.405929	-0.148531	0.255329		0.0325043	0.0221257	0.0110025	0.00270002	-0.0325043	-0.0221257	-0.0215018	-0.0194256
0.743581	0.593919	0.548187	0.780036	-0.743581	-0.593919	-0.195393	0.186117		0.0596904	0.0450393	0.00884322	0.00619678	-0.0596904	-0.0450393	-0.0508472	-0.0388425
0.656469	0.414587	0.509841	0.642825	-0.656469	-0.414587	-0.146629	0.228238		0.0364695	0.0282141	0.00792392	0.00384714	-0.0364695	-0.0282141	-0.0285456	-0.0243669
0.715767	0.431372	0.51369	0.643867	-0.715767	-0.431372	-0.202078	0.212495		0.04116	0.0278323	0.0109265	0.00342332	-0.04116	-0.0278323	-0.0302334	-0.024409
0.704677	0.439191	0.44883	0.601675	-0.704677	-0.439191	-0.255847	0.162484		0.044011	0.0328697	0.00902698	0.00244771	-0.044011	-0.0328697	-0.034984	-0.030422
0.970714	0.351638	0.557939	0.765932	-0.970714	-0.351638	-0.412776	0.414295		0.0229525	0.019273	0.0207797	0.00592753	-0.0229525	-0.019273	-0.00217274	-0.0133454
0.944352	0.436801	0.563687	0.765846	-0.944352	-0.436801	-0.380665	0.329045		0.0293602	0.0138303	0.018482	0.00629069	-0.0293602	-0.0138303	-0.0108782	-0.00753965
0.701771	0.187776	0.588749	0.715942	-0.701771	-0.187776	-0.113022	0.528166		0.00161942	0.0101927	0.0224406	0.00565897	-0.00161942	-0.0101927	0.0208212	-0.00453369
0.808323	0.33157	0.42585	0.668525	-0.808323	-0.33157	-0.382473	0.336955		0.0425023	0.0200442	0.0097461	0.00305086	-0.0425023	-0.0200442	-0.0327562	-0.0169933
0.679057	0.256372	0.411099	0.695471	-0.679057	-0.256372	-0.267958	0.439099		0.023409	0.00560876	0.0158596	0.00474815	-0.023409	-0.00560876	-0.00754943	-0.00086061
0.861144	0.486646	0.499769	0.763364	-0.861144	-0.486646	-0.361375	0.276717		0.0373369	0.0187304	0.0136497	0.00571771	-0.0373369	-0.0187304	-0.0236872	-0.0130127
0.826401	0.455015	0.574853	0.661745	-0.826401	-0.455015	-0.251548	0.20673		0.034541	0.0250283	0.0136856	0.00380962	-0.034541	-0.0250283	-0.0208555	-0.0212187
0.821223	0.525055	0.619419	0.634075	-0.821223	-0.525055	-0.201803	0.10902		0.0348888	0.032847	0.0097125	0.00245314	-0.0348888	-0.032847	-0.0251763	-0.0303938
0.868734	0.544917	0.466814	0.710595	-0.868734	-0.544917	-0.401921	0.165678		0.0452063	0.0351825	0.016099	0.00483011	-0.0452063	-0.0351825	-0.0291073	-0.0303523
0.982799	0.53855	0.511431	0.639846	-0.982799	-0.53855	-0.471368	0.101296		0.0543884	0.0324748	0.010588	0.00168866	-0.0543884	-0.0324748	-0.0438004	-0.0307862
0.600288	0.296361	0.525429	0.687208	-0.600288	-0.296361	-0.0748588	0.390847		0.017952	0.0125157	0.01346	0.00664505	-0.017952	-0.0125157	-0.00449199	-0.00587068
0.566442	0.358067	0.56511	0.767297	-0.566442	-0.358067	-0.00133137	0.40923		0.036813	0.0198317	0.0151063	0.0052588	-0.036813	-0.0198317	-0.0217068	-0.0145729
0.838577	0.383043	0.566923	0.616756	-0.838577	-0.383043	-0.271654	0.233712		0.0250295	0.0182108	0.0172465	0.00025083	-0.0250295	-0.0182108	-0.00778295	-0.01796
0.770433	0.358985	0.567799	0.677502	-0.770433	-0.358985	-0.202634	0.318518		0.0210031	0.0194371	0.0112769	0.00486759	-0.0210031	-0.0194371	-0.00972626	-0.0145696
0.883396	0.542702	0.562649	0.737928	-0.883396	-0.542702	-0.320747	0.195226		0.047417	0.0263729	0.00688753	0.00483118	-0.047417	-0.0263729	-0.0405294	-0.0215417
0.733209	0.530995	0.438437	0.713289	-0.733209	-0.530995	-0.294772	0.182294		0.0473206	0.0251846	0.0133145	0.00351509	-0.0473206	-0.0251846	-0.0340061	-0.0216695
0.849575	0.443561	0.636992	0.701941	-0.849575	-0.443561	-0.212583	0.25838		0.027042	0.0294685	0.0140693	0.00299517	-0.027042	-0.0294685	-0.0129727	-0.0264733
0.824295	0.380668	0.520246	0.702421	-0.824295	-0.380668	-0.30405	0.321753		0.0365221	0.0151142	0.00819805	0.00342898	-0.0365221	-0.0151142	-0.028324	-0.0116852
0.69604	0.4347	0.530638	0.6953	-0.69604	-0.4347	-0.165402	0.260599		0.0333541	0.0212007	0.0134749	0.0047729	-0.0333541	-0.0212007	-0.0198792	-0.0164278
0.916774	0.555741	0.619294	0.614341	-0.916774	-0.555741	-0.297481	0.0586001		0.053585	0.0339506	0.0122658	0.00253792	-0.053585	-0.0339506	-0.0413192	-0.0314127
0.850696	0.633889	0.552777	0.792606	-0.850696	-0.633889	-0.297919	0.158717		0.0519308	0.0425809	0.00796459	0.00678653	-0.0519308	-0.0425809	-0.0439662	-0.0357943
0.804829	0.482337	0.574888	0.730871	-0.804829	-0.482337	-0.22994	0.248534		0.0467397	0.0283383	0.00927646	0.00512641	-0.0467397	-0.0283383	-0.0374632	-0.0232119
0.697841	0.411872	0.438956	0.691461	-0.697841	-0.411872	-0.258885	0.279589		0.0312272	0.0237597	0.0140655	0.00405789	-0.0312272	-0.0237597	-0.0171617	-0.0197018
0.804184	0.44746	0.544001	0.693544	-0.804184	-0.44746	-0.260183	0.246083		0.0276248	0.0149026	0.00836036	0.00227199	-0.0276248	-0.0149026	-0.0192644	-0.0126306
0.77323	0.432077	0.615672	0.673647	-0.77323	-0.432077	-0.157558	0.241571		0.0377413	0.0293384	0.014575	0.00533297	-0.0377413	-0.0293384	-0.0231663	-0.0240055
0.918606	0.639407	0.498266	0.680973	-0.918606	-0.639407	-0.42034	0.0415665		0.0454956	0.0369498	0.0102473	0.00338973	-0.0454956	-0.0369498	-0.0352483	-0.0335601
0.869345	0.483536	0.523749	0.710157	-0.869345	-0.483536	-0.345596	0.226621		0.0440298	0.0326227	0.00779976	0.00557271	-0.0440298	-0.0326227	-0.0362301	-0.0270499
0.900312	0.466477	0.494734	0.663686	-0.900312	-0.466477	-0.405578	0.19721		0.0319476	0.0236554	0.00449815	0.00346727	-0.0319476	-0.0236554	-0.0274495	-0.0201881
0.899027	0.564736	0.592612	0.683749	-0.899027	-0.564736	-0.306416	0.119013		0.0444857	0.0308622	0.00692783	0.00464439	-0.0444857	-0.0308622	-0.0375579	-0.0262178
0.984135	0.548446	0.565766	0.735649	-0.984135	-0.548446	-0.418369	0.187204		0.0423723	0.036631	0.0106742	0.0050234	-0.0423723	-0.036631	-0.0316981	-0.0316076
0.812933	0.3348	0.55788	0.660543	-0.812933	-0.3348	-0.255054	0.325744		0.0299466	0.0119002	0.0105662	0.00321377	-0.0299466	-0.0119002	-0.0193803	-0.00868645
0.799823	0.406384	0.579572	0.75872	-0.799823	-0.406384	-0.220251	0.352336		0.0380263	0.027183	0.0157654	0.00650258	-0.0380263	-0.027183	-0.0222609	-0.0206805
0.929536	0.550118	0.521249	0.680426	-0.929536	-0.550118	-0.408288	0.130308		0.0451934	0.031697	0.0113622	0.00340712	-0.0451934	-0.031697	-0.0338312	-0.0282899
0.810985	0.443391	0.526004	0.67291	-0.810985	-0.443391	-0.284981	0.229519		0.0281691	0.0253871	0.010039	0.00398702	-0.0281691	-0.0253871	-0.0181301	-0.0214001
0.90074	0.459496	0.575695	0.70796	-0.90074	-0.459496	-0.325045	0.248464		0.0376134	0.026496	0.00686	0.00367368	-0.0376134	-0.026496	-0.0307534	-0.0228223
0.911834	0.462988	0.428463	0.620702	-0.911834	-0.462988	-0.483371	0.157714		0.0479913	0.027076	0.00769174	0.00215156	-0.0479913	-0.027076	-0.0402996	-0.0249245
0.888173	0.541365	0.540333	0.669362	-0.888173	-0.541365	-0.347841	0.127998		0.0387386	0.0180093	0.0123542	0.00385513	-0.0387386	-0.0180093	-0.0263844	-0.0141542
0.766509	0.538888	0.566697	0.742605	-0.766509	-0.538888	-0.199812	0.203717		0.0395518	0.0337742	0.0172579	0.0047425	-0.0395518	-0.0337742	-0.022294	-0.0290316
0.897505	0.504121	0.529533	0.699308	-0.897505	-0.504121	-0.367972	0.195187		0.0397312	0.0275885	0.00952507	0.00124139	-0.0397312	-0.0275885	-0.0302061	-0.0263471
0.858831	0.362992	0.535115	0.679426	-0.858831	-0.362992	-0.323715	0.316434		0.0172619	0.00571224	0.00608971	0.00234786	-0.0172619	-0.00571224	-0.0111722	-0.00336438
0.916471	0.484452	0.494283	0.704025	-0.916471	-0.484452	-0.422188	0.219574		0.0322106	0.020888	0.000637738	0.00357182	-0.0322106	-0.020888	-0.0315728	-0.0173162
0.901352	0.463818	0.542446	0.76222	-0.901352	-0.463818	-0.358906	0.298402		0.0335194	0.0268062	0.013311	0.00401249	-0.0335194	-0.0268062	-0.0202084	-0.0227937
0.830314	0.462135	0.496185	0.713012	-0.830314	-0.462135	-0.334129	0.250877		0.035558	0.0186469	0.0109426	0.00255023	-0.035558	-0.0186469	-0.0246154	-0.0160966
0.823636	0.494214	0.437707	0.659935	-0.823636	-0.494214	-0.385929	0.165721		0.0346268	0.0262427	0.00618255	0.00118993	-0.0346268	-0.0262427	-0.0284442	-0.0250528
0.732906	0.437912	0.481883	0.758364	-0.732906	-0.437912	-0.251023	0.320451		0.039652	0.0308025	0.00975006	0.00445952	-0.039652	-0.0308025	-0.0299019	-0.0263429
0.829945	0.429749	0.530541	0.661882	-0.829945	-0.429749	-0.299404	0.232134		0.0244515	0.0245281	0.016089	0.00228062	-0.0244515	-0.0245281	-0.00836254	-0.0222475
0.903681	0.410288	0.533209	0.743371	-0.903681	-0.410288	-0.370472	0.333083		0.0366288	0.0279041	0.0121513	0.00148992	-0.0366288	-0.0279041	-0.0244775	-0.0264142
0.817418	0.395381	0.550173	0.849723	-0.817418	-0.395381	-0.267246	0.454342		0.0324112	0.0188976	0.00896962	0.005358	-0.0324112	-0.0188976	-0.0234415	-0.0135396
0.81714	0.415466	0.509089	0.726428	-0.81714	-0.415466	-0.308051	0.310962		0.0377206	0.0128424	0.00761775	0.00358066	-0.0377206	-0.0128424	-0.0301028	-0.00926173
0.771807	0.595666	0.467987	0.684481	-0.771807	-0.595666	-0.30382	0.088815		0.040661	0.0372172	0.00482165	0.00198275	-0.040661	-0.0372172	-0.0358393	-0.0352344
0.848215	0.550418	0.541193	0.711295	-0.848215	-0.550418	-0.307022	0.160877		0.035641	0.0285791	0.00901236	0.00468708	-0.035641	-0.0285791	-0.0266286	-0.023892
0.861306	0.519308	0.506525	0.673299	-0.861306	-0.519308	-0.354781	0.153992		0.0420425	0.03223	0.00544981	0.00347187	-0.0420425	-0.03223	-0.0365927	-0.0287581
0.895375	0.576005	0.505884	0.68959	-0.895375	-0.576005	-0.389491	0.113585		0.0481313	0.0291324	0.00913988	0.00260983	-0.0481313	-0.0291324	-0.0389914	-0.0265226
0.724981	0.40772	0.539394	0.695432	-0.724981	-0.40772	-0.185587	0.287712		0.0412992	0.024792	0.0121698	0.00286574	-0.0412992	-0.024792	-0.0291294	-0.0219263
0.894058	0.557504	0.59374	0.669707	-0.894058	-0.557504	-0.300318	0.112204		0.041172	0.0280297	0.0149315	0.00332081	-0.041172	-0.0280297	-0.0262405	-0.0247089
0.785602	0.33657	0.539456	0.718209	-0.785602	-0.33657	-0.246145	0.381639		0.0142109	0.0161528	0.0136713	0.00465992	-0.0142109	-0.0161528	-0.000539568	-0.0114928
0.955361	0.482005	0.561848	0.784214	-0.955361	-0.482005	-0.393513	0.302208		0.0426447	0.0273832	0.00976332	0.00521535	-0.0426447	-0.0273832	-0.0328814	-0.0221678
0.808773	0.332679	0.588806	0.743394	-0.808773	-0.332679	-0.219967	0.410715		0.0239119	0.0115898	0.0126066	0.00444508	-0.0239119	-0.0115898	-0.0113054	-0.00714473
0.819903	0.418003	0.531662	0.685732	-0.819903	-0.418003	-0.28824	0.26773		0.0279968	0.0188452	0.0155962	0.00507459	-0.0279968	-0.0188452	-0.0124006	-0.0137706
0.855024	0.499883	0.516337	0.69568	-0.855024	-0.499883	-0.338687	0.195797		0.0486111	0.0225604	0.0126825	0.0056458	-0.0486111	-0.0225604	-0.0359286	-0.0169146
0.713076	0.385946	0.481067	0.727102	-0.713076	-0.385946	-0.232009	0.341156		0.0344709	0.0165205	0.0101392	0.00379828	-0.0344709	-0.0165205	-0.0243317	-0.0127223
0.899352	0.49771	0.539032	0.620894	-0.899352	-0.49771	-0.36032	0.123185		0.0463199	0.0222831	0.0161056	0.0021459	-0.0463199	-0.0222831	-0.0302143	-0.0201372
0.773355	0.505181	0.556244	0.713486	-0.773355	-0.505181	-0.21711	0.208305		0.0386217	0.028058	0.0139394	0.00384936	-0.0386217	-0.028058	-0.0246823	-0.0242087
0.801534	0.430449	0.496017	0.781179	-0.801534	-0.430449	-0.305517	0.350729		0.0346614	0.0216587	0.00662934	0.0052856	-0.0346614	-0.0216587	-0.028032	-0.0163731
0.796118	0.421054	0.508376	0.703629	-0.796118	-0.421054	-0.287742	0.282575		0.0348935	0.0274011	0.0126912	0.00495848	-0.0348935	-0.0274011	-0.0222023	-0.0224426
0.811317	0.428709	0.469998	0.747318	-0.811317	-0.428709	-0.341319	0.318609		0.0311265	0.0154064	0.0107505	0.00241992	-0.0311265	-0.0154064	-0.020376	-0.0129865
0.781838	0.372283	0.417468	0.699397	-0.781838	-0.372283	-0.36437	0.327114		0.0422517	0.0260187	3.35115e-06	0.00424885	-0.0422517	-0.0260187	-0.0422484	-0.0217698
0.780637	0.458195	0.488188	0.722229	-0.780637	-0.458195	-0.29245	0.264035		0.0310852	0.0256054	0.0102999	0.00389894	-0.0310852	-0.0256054	-0.0207853	-0.0217064
0.869706	0.486489	0.508807	0.737778	-0.869706	-0.486489	-0.3609	0.251289		0.0416803	0.0235295	0.00883119	0.0019363	-0.0416803	-0.0235295	-0.0328492	-0.0215932
0.785303	0.360865	0.502075	0.76288	-0.785303	-0.360865	-0.283227	0.402015		0.047466	0.0304449	0.0069369	0.00329809	-0.047466	-0.0304449	-0.0405291	-0.0271468
0.859207	0.569147	0.573965	0.677228	-0.859207	-0.569147	-0.285243	0.108081		0.0324505	0.026237	0.0137249	0.000929882	-0.0324505	-0.026237	-0.0187256	-0.0253071

## Sheet: Eucalyptus 500C Fresh vs Aged
Eucalytpus combusted at 500 C, fresh vs aged samples
mzmed	rtmed	maxint	Fresh	Aged	# of peaks	Scaled Intensity Difference	MassHunter m/z	MassHunter rt	formula	DBE	mass diff.	# of peaks visible for m/z ratio	iden. suggested
141.017	0.939	1.27751e+06	5.44943e+06	1.20948e+07	1	-0.0851868	141.018	0.94	C6H6O4	4	12.54	1	found in blank; kojic acid or muconic acid
666.06	multiple		336250	9.2071e+06	2	-0.0830146			too many options			1	too many options
96.9606	2.06808	247682	1.32709e+06	9.29411e+06	1	-0.0790924	96.992	1.857	C8H4O6	7	9	1	dihydroxyphthalic acid* (doubly deprotonated)
255.233	13.175	252772	321278	3.18006e+06	1	-0.027695	255.233	13.174	C16H32O2	1	-1.39	1	found in aged blank; palmitic acid
209.095	11.574	452687	108346	2.8174e+06	1	-0.0253767	209.095	11.574	C15H14O	9	10.19	multiple	found in aged blank; flavan or syringyl acetone*
232.975	multiple		4.70613e+06	5.05531e+06	5	-0.0240331	232.976	0.835	C7H6O7S	5	4.27	2	found in both blanks; uncertain
209.062	11.4677	452687	155519	1.48655e+06	1	-0.0129208	209.06	11.594	C14H9O2	1	-6.49957	1	Dihydroxyanthacene
223.02	0.939	175245	459177	1.52565e+06	1	-0.0118331	223.02	0.901	C5H8N2O8	3	1.47	1	found in both blanks; uncertain
277.181	12.499	199514	3522.75	1.07114e+06	1	-0.00982739	277.181	12.506	C17H26O3	5	0.13	1	found in fresh blank @ rt = 12.285 (panaxytriol or paradol); aged blank @ rt = 12.506
450.359	12.3849	108797	165914	1.15276e+06	1	-0.0098037			too many options			1	found in fresh blank @ rt = 12.844 and aged blank @ rt = 12.238
97.0288	3.67833	61101.7	20906	1.02041e+06	1	-0.00927832						1	no distinct peaks in any sample
195.811	1.20183	171872	107737	1.05656e+06	1	-0.00919676						1	found in both blanks; no formula found
389.29	12.69	41588.9	196089	1.07813e+06	1	-0.00897395	389.29	11.632	C25H42OS or C21H42O6?			1	found in fresh blank @ rt = 11.707 and aged blank @ rt = 12.659
471.267	12.113	9381.41	19604	858432	1	-0.00779592			too many options			1	found in both blanks; uncertain
291.989	multiple		342088	936712	2	-0.00697853			too many options			2	found in both blanks; uncertain
217.041	10.757	28318.1	69991.1	781986	1	-0.00685323						1	found in both blanks; no distinct peaks in any sample
194.927	2.177	21987.8	50788.7	762828	1	-0.00676867						1	peaks in both samples (not blanks), but no formula found for either
265.148	13.523	55361.5	0	667482	1	-0.00613443	265.148	12.538	C12H26O4S	0	0.57	1	found in fresh blank @ rt = 12.362 and aged blank @ rt = 13.498; dodecyl sulfate or laurilsulfate?
649.554	12.963	18313.9	0	594319	1	-0.00546203	649.553	13.254	C39H74N2O5	4	0.06	1	unknown, potential dinitro species
726.103	12.963	28560.7	0	537525	1	-0.00494008
291.989	multiple		396382	731636	2	-0.00483506
664.079	13.638	33900.1	0	513357	1	-0.00471797
227.202	13.523	50874.6	0	455177	1	-0.00418326
242.177	11.345	75430	2745.7	423714	1	-0.00388102
129.019	multiple		218275	531975	3	-0.00384887
197.046	8.41483	102586	452680	650237	1	-0.00381868
692.122	13.131	31190.2	0	404120	1	-0.00371402
183.029	7.276	63143.9	42002.3	425349	1	-0.00370897
105.019	1.246	34800.2	88799.8	447884	1	-0.00369306
153.019	multiple		291379	544196	2	-0.00361281
493.499	13.293	8468.7	0	376441	1	-0.00345964
367.264	14.238	11701.1	7270.14	333437	1	-0.00302978							in blank
299.202	12.652	41230.5	0	321651	1	-0.00295611
103.004	1.246	28663.8	67723.6	336399	1	-0.00276891
239.128	11.729	48202.1	147334	371569	1	-0.00271275
605.585	13.214	4880.19	0	292904	1	-0.00269191
149.045	1.20183	71065.2	275920	431161	1	-0.00264764
99.0091	6.59075	69027.2	359369	457687	1	-0.00249374
409.31	13.408	9796.1	0	269633	1	-0.00247804
217.042	9.137	21345	251862	397392	1	-0.00245194
361.258	13.175	17780.2	5713.99	257401	1	-0.00233839
649.554	multiple		0	248027	2	-0.00227947
195.03	8.747	40219.1	191675	347217	1	-0.00227763
103.004	1.85242	18154.7	27224.4	257324	1	-0.00223517
253.217	12.151	15182.8	54913.5	268152	1	-0.00220273
61.9895	multiple		206712	345813	3	-0.00219307
305.048	13.967	6866.9	206482	343080	1	-0.00216905
253.18	12.0605	15182.8	50079.3	258872	1	-0.00214049
201.028	14.507	7645.98	35593.7	231506	1	-0.00195801
197.046	8.99533	18516.8	84801.2	251343	1	-0.00190582
160.842	1.20183	34778.2	99597.9	257201	1	-0.00188915
165.019	7.276	20568.4	155993	283034	1	-0.00185781
187.097	10.066	39211.2	141057	274114	1	-0.00184701
241.217	13.051	19541.7	0	196019	1	-0.00180149
249.978	0.138	9817.33	0	195874	1	-0.00180017
309.171	11.845	33191.9	127310	260887	1	-0.00179096
412.343	12.963	23382.7	0	194271	1	-0.00178543
68.997	multiple		1.32562e+06	875818	4	-0.00173184
253.217	12.537	16662.4	11312.9	193348	1	-0.00172304
171.066	7.47	28476.5	23670.9	194744	1	-0.00167697
217.035	14.805	19758.4	80951.2	209739	1	-0.00154181
195.03	8.169	22005.3	37486.7	187125	1	-0.00154111
411.322	12.614	25849.6	0	165053	1	-0.0015169
199.17	13.89	19362.6	0	160300	1	-0.00147322
661.609	13.523	9721.24	0	159358	1	-0.00146457
181.014	multiple		270136	298637	2	-0.00145725
230.986	10.667	15203.3	13410.9	163247	1	-0.00143639
217.037	13.929	12447	91024.1	201367	1	-0.00141687
147.045	10.1251	12081.5	101412	205405	1	-0.00140447
129.056	7.199	43501.3	548013	431508	1	-0.00135415
280.062	11.5745	23910.2	0	146085	1	-0.00134258
591.57	13.175	6988.58	0	145604	1	-0.00133816
147.03	1.20183	19745.2	35379.6	162500	1	-0.00132484
170.833	multiple		0	143891	2	-0.00132242
385.307	12.461	25997.1	51155.1	170005	1	-0.00131863
127.004	2.1515	3951.12	35801	161852	1	-0.00131688
375.181	10.941	14761.4	12319.7	148208	1	-0.00130338
61.989	12.963	5463.4	64312.6	173571	1	-0.00128871
185.043	1.036	19896	3311.17	139425	1	-0.00126559
217.003	0.841	31837.3	123809	201140	1	-0.00125854
137.025	9.27992	90495.2	709949	504521	1	-0.00125346
195.03	9.835	17962.9	53475.1	163401	1	-0.00124689
664.079	14.044	14242.3	0	135533	1	-0.0012456
75.0096	1.85242	11783.9	59967.6	166072	1	-0.00124049
217.038	11.767	13120.8	57391.8	164029	1	-0.00123399
135.03	1.208	17806	2414.37	134941	1	-0.00122866
175.025	1.246	14904.1	78444.9	173962	1	-0.00122495
165.04	1.169	14125.4	29048.9	145691	1	-0.00120053
309.204	13.561	20976.5	0	127956	1	-0.00117597
299.005	0.874	37042.5	18212.8	136664	1	-0.00116921
286.202	11.421	20913.4	0	126681	1	-0.00116425
233.154	12.4212	23020.6	80006.7	166949	1	-0.00115305
217.037	13.131	10675	77745.2	165679	1	-0.00115216
213.04	8.363	14765.7	0	125343	1	-0.00115196
61.9894	multiple		45170.2	148077	2	-0.00114563
163.024	multiple		2540.93	125219	2	-0.0011387
309.206	11.7932	33191.9	90288.2	170300	1	-0.00113485
311.294	13.485	8595.53	0	123134	1	-0.00113165
103.002	13.841	3924.48	347910	303032	1	-0.00112701
317.25	multiple		61269.6	154277	2	-0.00112588
131.035	6.59075	34779.2	221009	236937	1	-0.00112432
157.123	12.307	20689.2	6778.04	124465	1	-0.00111158
255.197	12.0242	22156.9	157459	202348	1	-0.00110928
116.929	1.87783	24943.9	323537	287871	1	-0.00110383
145.05	7.161	20372.8	66100.2	154099	1	-0.00110123
173.082	9.292	20730.8	64382.4	149201	1	-0.0010644
293.176	11.7659	19207.2	85624.4	160176	1	-0.00106404
105.018	10.883	41557.1	1.53197e+06	909845	1	-0.00106119
68.9963	12.268	17251.6	83815.6	156039	1	-0.00103463
165.02	9.215	17492.7	109352	165871	1	-0.0010033
463.012	0.92	15649.3	14809.2	116819	1	-0.00100304
146.048	multiple		0	108035	2	-0.000992887
180.99	9.18733	8443.88	43934.5	127142	1	-0.000959118
169.014	8.671	12863	6284.06	104741	1	-0.000932663
397.274	12.924	13056.4	8763.91	105092	1	-0.000924078
185.081	8.901	14774.2	18457.7	108142	1	-0.000905905
157.051	6.674	10906.9	49361.4	124102	1	-0.000905319
239.057	9.911	14720.8	21539.3	108226	1	-0.000891992
183.03	8.208	12311.9	24999.1	108948	1	-0.000882147
283.032	0.92	13835	7173.98	97806.1	1	-0.000864691
301.217	13.254	8210.66	0	92565.3	1	-0.000850713
201.037	0.997	11712.1	38727.6	112371	1	-0.000848178
339.2	13.7837	8630.72	76491.6	131781	1	-0.0008466
201.04	8.671	9993.95	0	90646.9	1	-0.000833083
417.321	13.293	8036.06	15101.4	97013.1	1	-0.000819624
148.028	14.788	2605.29	0	89120	1	-0.000819049
545.015	0.92	11832.7	10799.7	94587.9	1	-0.000817835
199.025	7.315	6939.66	0	88586.2	1	-0.000814144
69.0349	7.75817	8243.29	58023.6	115663	1	-0.00078648
197.009	7.123	9744.5	56676.8	114278	1	-0.00078017
359.183	12.499	14152.7	0	84624.8	1	-0.000777736
381.009	0.92	13589.8	14604	91737.6	1	-0.00077351
297.243	12.7673	7696.09	57626.7	111902	1	-0.000753806
297.243	13.523	10787.8	12075.9	88258.8	1	-0.000753586
426.312	12.229	7145.99	0	81367.2	1	-0.000747798
221.85	1.208	21242.4	37060.5	99874.2	1	-0.000741272
403.304	12.537	8661.42	2968.4	80580.4	1	-0.000726421
279.233	13.7218	7010.27	9379.24	82816.9	1	-0.000716424
591.573	12.384	4001.04	0	77715.6	1	-0.000714239
171.139	12.595	11738.4	2919.37	79115.4	1	-0.000713191
131.034	5.601	14666.4	148432	151475	1	-0.00068476
374.993	14.943	6302.55	0	73263.8	1	-0.000673325
241.217	12.461	7385.15	10253.1	77763.7	1	-0.000665819
177.04	1.208	11424.5	34747.7	90230	1	-0.000663659
217.038	12.537	10564.1	42044.5	92487.4	1	-0.000649632
395.245	12.075	12014.5	0	68949.9	1	-0.000633678
179.056	1.14283	18584	106483	123902	1	-0.000631255
157.014	7.626	9525.86	0	68250.9	1	-0.000627254
121.031	14.707	7615.66	0	68129.3	1	-0.000626137
154.015	8.556	10277.7	7741.13	71628	1	-0.0006214
68.9964	multiple		1.75433e+06	977020	4	-0.000618862
394.976	12.036	7014.02	0	67120	1	-0.00061686
131.035	multiple		289537	215855	2	-0.000603993
385.258	12.586	25997.1	158913	147907	1	-0.000602014
150.002	9.988	9823.36	10454.1	70732.7	1	-0.000600244
494.384	12.191	3270.08	0	65265.1	1	-0.000599813
273.077	11.421	8523.35	26159.3	74568.9	1	-0.000560655
591.572	12.767	5428.55	0	60872.4	1	-0.000559442
205.036	5.951	6790.47	0	60492.9	1	-0.000555955
388.291	12.3177	5820.92	61846	92407	1	-0.000554528
145.014	1.208	9378.12	4548.96	62174.4	1	-0.00054973
325.184	13.1495	33495.1	345132	238653	1	-0.000548579
446.312	12.461	5525.88	0	59416.6	1	-0.000546063
344.979	11.383	7410.82	0	59375.6	1	-0.000545687
180.989	9.75583	6179.52	24344.5	71545.9	1	-0.000541522
565.552	13.131	2714.99	0	58799.5	1	-0.000540391
195.051	1.208	4752.67	13581.2	64907	1	-0.0005318
398.265	8.671	7937.39	0	56837.2	1	-0.000522357
519.328	12.652	4799.66	0	56513.5	1	-0.000519382
271.228	13.561	4360.37	0	56149.1	1	-0.000516034
383.205	12.499	9424.91	0	55749.3	1	-0.000512359
405.226	12.652	6116.68	0	53590.2	1	-0.000492516
193.036	1.169	6437.52	30725.9	67965.7	1	-0.000478207
103.002	12.576	3129.15	62840.6	84327.4	1	-0.000475534
808.567	13.714	2284.23	0	51621	1	-0.000474418
159.066	8.363	9157.13	115658	111224	1	-0.000471018
689.641	12.886	5380.33	0	51181.1	1	-0.000470376
428.336	12.924	4994.39	0	51053.4	1	-0.000469202
689.637	13.254	5012.26	0	50389.1	1	-0.000463097
661.612	12.8075	11045.8	0	50377.8	1	-0.000462993
587.507	13.175	2652.9	0	50157.7	1	-0.00046097
103.003	11.922	3220.07	77533.6	90282.4	1	-0.000460243
217.044	10.2477	12724.5	172264	139315	1	-0.000459436
98.9575	1.95917	5267.42	60508.9	80857.2	1	-0.000454753
487.301	12.537	4227.1	0	49307.4	1	-0.000453155
211.061	multiple		153773	128912	2	-0.000451945
280.985	11.383	5514	2257.88	49701.8	1	-0.00044602
143.107	11.845	6682.42	0	48134.1	1	-0.000442373
201.028	14.943	5172.79	0	46208.3	1	-0.000424674
148.029	11.729	2201.45	0	46129.1	1	-0.000423945
269.138	9.835	7209.77	21054.8	56623.4	1	-0.000420055
267.196	12.729	7717.22	25379	58573.8	1	-0.000417373
201.802	1.208	6999.08	13567.5	48678.6	1	-0.00038272
151.04	10.582	19206.1	247859	170072	1	-0.000381854
689.639	13.408	5896.39	0	41071.4	1	-0.000377463
513.055	0.997	3562.22	0	40865	1	-0.000375566
185.875	1.208	10378.4	0	40674.2	1	-0.000373813
697.436	12.886	3001.31	0	40276.8	1	-0.000370161
346.813	2.139	4142.01	0	40054.6	1	-0.000368118
367.228	11.806	11649.6	123435	103745	1	-0.000365227
589.518	12.614	1956.17	0	39415.4	1	-0.000362244
374.221	8.671	5257.9	0	38934.8	1	-0.000357827
301.002	0.997	9909.54	37189.3	57899.7	1	-0.000354895
319.062	multiple		65781	72572	2	-0.000353484
595.058	0.958	3171.13	0	37387.3	1	-0.000343604
533.454	13.175	3621.26	0	36926	1	-0.000339365
111.045	7.431	3824.17	200290	140465	2	-0.000336442
128.035	5.913	1422.48	0	36541.4	1	-0.000335831
179.035	8.39408	31189.9	226673	153961	1	-0.000334742
697.436	12.461	2140.03	0	36126.3	1	-0.000332016
145.014	1.9995	7052.22	53493.9	63841.1	1	-0.000331799
380.977	12.729	2139.5	0	36021	1	-0.000331048
232.976	7.05033	16321.6	139769	108459	1	-0.000330711
247.169	12.652	5876.72	0	35974.9	1	-0.000330624
213.185	12.345	4001.7	0	35659.2	1	-0.000327722
125.043	0.958	4641.52	14180.3	42949	1	-0.000327142
148.028	13.967	2657.16	29060.1	50567.2	1	-0.000326247
330.982	12.036	3803.14	0	35367.7	1	-0.000325044
199.098	8.13	4812.31	13379.5	42237.2	1	-0.000324416
216.935	0.835	8463.65	6859.58	38188.5	1	-0.000318279
724.105	12.963	2177.33	0	34273.6	1	-0.000314988
335.221	12.537	3570.54	0	34115.1	1	-0.000313532
599.145	10.343	4470.41	0	33617.8	1	-0.000308962
305.048	14.468	6400.34	40674.3	54648.5	1	-0.000308407
205.035	1.208	4567.45	0	33382	1	-0.000306794
221.853	14.507	885.619	0	33014.1	1	-0.000303413
225.186	11.96	2264.93	2538.27	34014.7	1	-0.000300513
333.227	13.561	4203.21	0	32345	1	-0.000297264
223.133	11.5038	7708.72	28951.5	47079.9	1	-0.000294714
677.06	0.958	2581.44	0	31804.2	1	-0.000292294
390.962	0.797	4296.45	0	31463.4	1	-0.000289162
410.324	13.001	2965.74	6684.12	34398.1	1	-0.000284279
315.182	11.806	6096.78	17806.5	40145.6	1	-0.000284097
359.238	12.499	3036.02	0	30765.9	1	-0.000282751
395.23	12.69	3211.67	0	30451.6	1	-0.000279863
213.039	6.6045	4112.3	24476.5	42827.8	1	-0.000276961
185.154	13.175	4506.02	0	29929.7	1	-0.000275066
183.103	9.524	5078	15865.3	38012.2	1	-0.000273741
213.039	6.30617	3344.19	35048.1	47895.6	1	-0.000273157
315.252	12.924	3553.34	0	29628.4	1	-0.000272297
164.836	1.22208	5614.06	26478.8	43312.8	1	-0.000271877
294.073	12.036	2714.15	0	29418.7	1	-0.00027037
294.067	12.652	1355.29	0	29255.9	1	-0.000268874
444.332	12.729	2878.82	0	29218.6	1	-0.000268531
464.34	11.536	3441.92	0	29218.3	1	-0.000268528
422.328	11.767	2568.02	0	28700.1	1	-0.000263766
173.009	1.983	3853.65	23350.7	40647.5	1	-0.000262289
316.252	13.175	2105.88	0	28385.9	1	-0.000260878
85.0304	6.927	3714.11	14841.6	35306.4	1	-0.000253752
239.201	13.214	2704.48	0	27430.6	1	-0.000252099
221.118	11.306	6082.73	14479.7	34703.4	1	-0.000249935
495.284	12.69	2884.49	0	26613.9	1	-0.000244593
148.027	12.268	2524.93	0	25504.7	1	-0.000234398
146.048	14.276	3387.72	0	25165.9	1	-0.000231285
314.978	0.874	6274.64	15234.7	32858.7	1	-0.000229384
456.995	14.867	2782.37	0	24950.4	1	-0.000229304
213.017	1.19567	6862.49	30894.2	40694.4	1	-0.00022677
151.004	6.615	3010.73	0	24673.6	1	-0.000226761
391.173	11.845	3727.49	6672.96	27944.5	1	-0.000225021
390.965	14.727	4428.56	0	24382.6	1	-0.000224086
184.008	8.324	3463.17	0	24320.2	1	-0.000223513
280.979	0.958	2436.36	8263.21	28603.8	1	-0.000223502
142.999	1.246	2376.11	10043.4	29430.3	1	-0.000222615
192.958	14.867	3759.37	17905.5	33412.5	1	-0.000221745
655.421	14.276	2548.84	0	23517.4	1	-0.000216135
243.161	11.998	4598.81	2479.05	24726.8	1	-0.000215435
289.219	13.561	2510.39	0	22554.3	1	-0.000207283
478.388	12.576	2685.27	0	22410	1	-0.000205957
319.065	12.268	2131.78	8506.24	26158.5	1	-0.000199871
157.086	8.86433	3194.24	51768.1	48314.3	1	-0.000197325
175.039	10.9892	9655.16	62537.4	53839.6	1	-0.000196784
731.557	13.229	3819.14	0	21359	1	-0.000196298
649.124	12.614	2339.55	0	21124.7	1	-0.000194145
294.067	14.982	1282.78	0	20980	1	-0.000192814
273.096	8.42767	3386.94	37231.3	40264.6	1	-0.000192621
315.119	11.574	4997.69	20268.3	31292	1	-0.000190997
228.883	1.208	2324.22	0	20492.5	1	-0.000188334
323.109	9.097	6188.9	17508.5	29489.7	1	-0.000187585
294.066	multiple		0	20396.4	2	-0.000187452
406.937	0.797	2443.29	0	19976.3	1	-0.00018359
455.995	0.92	3141.18	14063.1	27183.2	1	-0.000182807
879.755	12.924	2206.7	0	19793.6	1	-0.000181911
185.078	1.036	2868.41	0	19742.4	1	-0.000181441
227.166	12.075	3584.16	11592.4	25655	1	-0.000180536
243.898	1.208	3391.18	0	19436.6	1	-0.00017863
219.853	1.208	3698.09	0	19301.9	1	-0.000177393
193.091	12.036	2832.9	5540.12	21983.4	1	-0.000175634
323.22	13.051	2529.81	8136.37	23130.1	1	-0.000173801
849.727	12.848	2198.08	0	18549.3	1	-0.000170476
282.981	12.191	2034.03	0	18517.7	1	-0.000170185
450.358	13.5887	2062.7	22277.9	29811.7	1	-0.000167816
304.994	6.615	1815.65	0	18037.1	1	-0.000165768
124.991	2.023	4538.24	5196.78	20689.4	1	-0.000165379
347.241	13.051	2224.62	0	17833.4	1	-0.000163896
384.312	13.676	2507.46	0	17631.7	1	-0.000162042
307.065	multiple		66477.9	51825.1	2	-0.000159491
175.025	1.87783	14758.3	73843.3	55576.4	1	-0.000158867
148.027	13.485	2214.4	10738.1	22833.6	1	-0.000158677
148.028	12.886	2217.3	0	17146	1	-0.000157579
431.261	13.131	2544.23	0	17027.2	1	-0.000156487
103.002	11.185	2934.24	28887.3	31990.6	1	-0.000156343
257.175	12.345	2358.68	3954.66	18709.7	1	-0.000153103
243.196	13.369	2393.46	0	16477.3	1	-0.000151433
77.0412	9.642	1961.31	7302.88	20146.4	1	-0.000150352
115.076	10.582	1905.44	5036.1	18725.1	1	-0.000148091
103.003	11.574	3094.88	26703.7	29656.3	1	-0.000145296
389.29	11.806	8254.82	37759	35216.2	1	-0.000143709
263.85	1.208	3452.59	0	15421	1	-0.000141726
261.061	0.958	3089.46	22923.5	27289.9	1	-0.000141562
561.484	13.175	1331.67	0	15298.6	1	-0.000140601
337.078	9.6145	5132.31	30293.6	30786.7	1	-0.000138577
383.179	12.345	2542.41	7289.3	18843.9	1	-0.000138445
125.873	1.246	2188.09	2580.69	16280.9	1	-0.00013733
199.097	9.11617	7588.89	84379.6	58143.6	1	-0.000132249
341.219	12.537	2583.3	0	14376	1	-0.000132121
359.255	13.175	1543.66	0	14237.9	1	-0.000130852
403.241	11.026	2634.68	10607.1	19465.3	1	-0.000128346
231.014	3.888	3989.92	80154.8	55452.3	1	-0.000127649
409.303	12.422	2380.93	0	13802.1	1	-0.000126847
215.127	11.185	9663.06	88145.2	59201.9	1	-0.00012403
594.963	12.2663	1970.13	40777.9	34526.7	1	-0.000122986
319.063	13.929	1883.42	13677.9	20469.9	1	-0.000122944
179.035	10.0353	18763.9	203560	118536	1	-0.000119322
169.05	6.6045	8493.86	67690.8	48034.7	1	-0.000118875
145.051	7.782	36030.5	254735	144594	1	-0.000114923
209.113	9.86167	4553.92	31150.7	28562	1	-0.000114046
407.245	13.293	2175.05	0	12083.9	1	-0.000111056
210.99	8.786	2000.19	0	11758.1	1	-0.000108062
277.051	8.53717	3625.9	27160.9	25759.1	1	-0.000107301
258.169	10.506	1010.11	0	11672.8	1	-0.000107278
565.549	13.523	1729.83	0	11420.5	1	-0.000104959
265.922	2.838	2054.01	0	11284	1	-0.000103704
295.264	13.051	2096.37	5348.12	13882.5	1	-0.000102099
397.258	13.214	1780.99	3735	12952.4	1	-0.000101238
157.087	9.64967	2333.63	28495.9	25307.6	1	-9.67885e-05
114.934	2.372	901.884	0	10212.7	1	-9.38591e-05
112.017	7.084	1469.24	2475.48	11254.5	1	-9.16369e-05
179.841	1.208	1484.47	0	9804.8	1	-9.01102e-05
271.228	12.8125	4548.79	50459.1	35088.3	1	-8.2011e-05
325.974	6.615	1318.25	0	8911.17	1	-8.18973e-05
179	7.161	3066.26	33325.2	26150.4	1	-8.15204e-05
209.063	1.169	1366.08	3262.12	10546.4	1	-8.13803e-05
177.844	1.208	923.009	0	8759.59	1	-8.05042e-05
109.004	13.4465	3754.02	68621.6	44194.5	1	-7.91464e-05
319.064	14.353	2096.78	18411.6	18075.3	1	-7.83779e-05
79.9579	1.918	2615.06	24249.7	21056.9	1	-7.79585e-05
335.065	10.426	1768.23	15588.4	16473.1	1	-7.71076e-05
503.294	12.729	1270.61	0	8089.12	1	-7.43423e-05
238.983	9.177	1404.34	0	7887.32	1	-7.24877e-05
191.86	1.246	1075.71	0	7768.92	1	-7.13995e-05
255.823	1.208	2555.21	19593.3	17913.5	1	-7.12601e-05
308.875	2.139	680.045	0	7654.16	1	-7.03449e-05
429.29	12.767	924.712	0	7652.91	1	-7.03334e-05
383.171	10.862	2091.04	10782.9	13129.7	1	-6.9281e-05
294.066	14.547	1436.44	0	7492.86	1	-6.88624e-05
335.061	1.246	1129.39	2533.28	8613.2	1	-6.70864e-05
528.314	12.499	831.032	0	7006.75	1	-6.43949e-05
114.935	2.023	1043.31	0	6821.71	1	-6.26943e-05
301.904	1.246	921.344	0	6480.64	1	-5.95597e-05
274.985	1.3955	2618.22	38739.6	26363.7	1	-5.76776e-05
71.0145	2.65317	8275.82	82309.3	48741.5	1	-5.57061e-05
129.093	11.306	2492.77	16953.6	14712.5	1	-5.4421e-05
71.0512	5.562	2057.15	21459.3	16740.8	1	-5.15893e-05
213.961	8.671	1003.81	0	4998.12	1	-4.59348e-05
259.112	7.626	1400.53	10100.9	9926.69	1	-4.30942e-05
134.865	1.19567	1864.49	12000.8	10693.8	1	-4.10902e-05
241.054	9.96667	2559.07	25593.1	17735.5	1	-4.10315e-05
269.086	11.185	8782.76	81171.1	46185.2	1	-3.76364e-05
285.122	10.2825	2049.78	17416.5	12598.1	1	-3.27828e-05
109.006	14.587	3691.89	19360.8	12538	1	-2.29652e-05
157.086	9.2945	5305.37	59565	33251.2	1	-2.17328e-05
309.173	12.576	14665.6	43229	23929.1	1	-1.39084e-05
315.089	10.0373	6598.76	41478.1	22569.8	1	-9.76033e-06
197.08	8.37583	14740.1	123309	64955.8	1	-9.33788e-06
225.056	12.1363	1379.36	12234.6	7212.02	1	-7.97685e-06
109.005	14.16	2834.68	30835.5	16394.3	1	-3.72276e-06
173.045	1.23617	5651.51	56457.4	29331.6	1	-5.1988e-07
273.097	8.86433	6042.95	81758.9	41662.9	1	6.72639e-06
128.035	2.05283	4064.94	69598.4	34509.7	1	1.45161e-05
201.113	10.667	15970.4	159162	80287.2	1	2.06189e-05
337.236	0.998167	2102.84	27235.7	10822.6	1	3.03289e-05
199.021	1.43533	4380.35	36327.4	14297.4	1	4.17208e-05
333.085	5.89333	1733.25	54093.4	23192.9	1	4.46316e-05
215.089	9.4015	5187.73	39662.8	14392.9	1	5.67381e-05
263.089	10.2477	5878.27	52832.6	21181.2	1	5.71122e-05
247.118	9.018	8593.93	59289.5	24510.4	1	5.72863e-05
387.274	13.1007	6238.41	57529.7	23333.7	1	5.97141e-05
267.196	13.131	6985.94	58842.5	23912.3	1	6.06531e-05
275.201	12.4032	2323.33	22602.8	4478.76	1	6.65527e-05
185.118	10.9892	5850.36	45012.1	16025.5	1	6.72262e-05
239.06	11.612	22856.7	155974	73182.8	1	7.0721e-05
327.215	11.8348	2536.99	31439.6	8406.71	1	7.25659e-05
286.048	11.5388	3004.39	27438.2	6026.74	1	7.53698e-05
261.134	9.757	10075.4	96519.3	41132.2	1	8.1945e-05
233.065	1.6355	3549.94	59236.5	21615.3	1	8.36404e-05
203.021	8.75633	3815.12	29667.7	6248.69	1	8.39547e-05
381.243	14.1447	1766.16	20044.5	1053.21	1	8.58434e-05
271.191	11.3155	3407.15	54405.1	18241.2	1	9.16256e-05
139.04	6.64217	9095.55	77677.7	30127.9	1	9.32884e-05
167.012	1.43558	4044.46	35106.6	8046.09	1	9.33554e-05
207.08	12.0605	2859.44	38861.4	9930.02	1	9.39349e-05
544.966	11.9478	2543.42	27312.4	3290.38	1	9.99187e-05
267.232	13.3572	3647.31	44403.5	11789.3	1	0.000103258
241.18	12.0242	3991.92	33365	5906.52	1	0.000104719
478.39	12.9333	4371.26	86282.8	33185.3	1	0.000106198
89.0248	1.246	20622.6	286380	136875	1	0.000106818
209.117	10.1778	4102.98	30314.8	3820.12	1	0.000109358
150.032	9.473	5800.76	47991.8	12746	1	0.000111566
213.019	10.3533	3799.97	40907.8	8674.17	1	0.000115228
478.389	13.4302	1826.16	24577.7	0	1	0.000117126
108.045	1.19567	4871.14	31826.5	3261.43	1	0.000121697
233.064	1.23617	4982.12	36821.2	5825.24	1	0.000121937
171.082	11.6845	4905.21	50352.9	12326.7	1	0.000126671
163.061	2.488	5037.53	95587.2	35574.4	1	0.000128582
251.037	6.828	6220.91	46609.3	10107.1	1	0.00012923
185.118	10.2825	9749.41	63731.4	18932	1	0.000129722
110.975	1.322	3135.75	50419.2	11793.3	1	0.00013189
311.169	12.7677	44074.9	407775	196900	1	0.000133677
267.233	13.0158	6985.94	79581.6	26670.6	1	0.000134136
321.887	1.19567	4926.84	39758.6	5831.07	1	0.000135882
193.071	1.19567	7977.55	55171.5	13818.3	1	0.000135926
68.9968	multiple		942692	473823	3	0.000137808
171.103	10.0902	23051.7	182996	79621	1	0.000140326
185.025	10.4768	19115.1	160147	67674.7	1	0.000141231
309.08	9.6145	10689.5	67418.7	19408.4	1	0.000142916
225.187	14.4128	2772.93	30701.7	0	1	0.00014631
219.067	6.828	10383.7	58614.8	14105.4	1	0.000149697
327.217	11.3957	3400.93	74345.9	22204.8	1	0.000150228
146.061	10.583	4038.94	65730.4	17432.3	1	0.000153031
209.062	6.828	6156.09	46510.6	7459.64	1	0.000153091
494.968	11.6488	4711.84	39932.7	1578.95	1	0.00017579
323.885	1.19567	5598.71	40641.8	1782.04	1	0.000177303
285.911	1.23617	6079.63	61342.1	12419.5	1	0.000178189
333.998	1.33758	6419.62	114279	39798.3	1	0.000178838
263.077	6.04383	12228.9	81805.4	22758.3	1	0.000180689
263.054	8.79233	10454	72940.9	17944.2	1	0.000182689
75.0094	1.22083	92461.6	595517	288621	1	0.000185415
279.908	1.23617	4701.11	47105.1	4243.63	1	0.000185481
229.144	11.652	5157.89	110196	35712.7	1	0.000196932
435.221	12.0242	7414.3	50772.5	4513.48	1	0.000200478
267.197	12.3603	5998.37	55652.3	6328.53	1	0.000207052
175.061	6.23217	13936.8	87038.6	22073.6	1	0.000211921
226.916	9.89667	5012.27	44541.8	0	1	0.000212266
127.001	0.92	5546.5	44617	0	1	0.000212624
144.045	9.36608	8322.58	58230.2	5411.26	1	0.000227767
259.118	9.72067	12686.5	90889.7	21959.9	1	0.000231318
197.081	8.86433	8959.95	94556.5	23504.9	1	0.000234593
281.173	13.89	5186.33	94854.8	22258.8	1	0.000247467
380.977	11.3957	9180.87	65442.9	6489.16	1	0.000252233
167.035	8.82617	34987	429646	194524	1	0.000259745
199.805	1.23617	6951.57	64496.6	4844.05	1	0.000262843
211.04	11.1382	10021.9	97001.1	20263.9	1	0.000276029
160.936	8.75633	14642.5	149528	47482.4	1	0.000276201
405.986	1.19567	9312.18	65678	3446.51	1	0.000281317
239.201	12.6707	8796.7	72010.1	5755.39	1	0.000290273
162.839	1.19567	7267.52	61866.4	0	1	0.000294827
299.094	10.5653	9692.94	140114	40561.3	1	0.000294944
215.023	0.4085	5438.38	69882.7	3628.26	1	0.000299684
117.02	2.876	50451.1	2.08514e+06	1.04836e+06	1	0.000301931
313.238	12.0605	7042.68	92028.5	13844	1	0.000311333
371.244	12.0242	12861.8	77379.6	5947.88	1	0.000314092
275.201	11.7932	7117.16	76530.4	5478.51	1	0.000314359
171.046	10.4065	6718.13	92069.1	13362	1	0.000315957
205.072	6.08067	18724	154147	43366.9	1	0.000336035
281.088	1.19567	14647.1	107817	19296	1	0.000336471
360.26	11.7572	4313.11	104030	16801.7	1	0.000341345
229.051	10.2128	9503.27	127225	23531	1	0.000390039
269.082	10.742	10376.6	142696	31365	1	0.000391769
297.153	12.447	18528.1	130591	24985	1	0.000392713
551.306	11.613	9444.15	89703.8	3014.23	1	0.000399786
637.341	11.7932	11216.4	92652.5	4408.73	1	0.000401021
215.023	1.87783	14559.6	103565	9678.14	1	0.000404597
197.808	1.19567	16749	114492	14218.2	1	0.000414944
153.092	9.57933	11177.1	107465	10028.2	1	0.000419967
199.04	10.9892	10172.4	98681.8	5465.29	1	0.000420044
281.047	7.86983	12402.8	91889.7	1476.78	1	0.000424332
153.02	6.26917	21650.4	188228	50922.6	1	0.00042901
161.025	10.3533	13916.9	114493	11802.4	1	0.000437151
244.985	9.22367	6593.08	181255	46187.7	1	0.000439294
215.024	1.19567	21204.2	161208	34588.9	1	0.000450357
245.082	10.1072	13040.7	140736	23912.8	1	0.000450915
168.031	9.4015	11904.2	125869	15626.1	1	0.000456225
329.233	11.3957	8528.39	159076	32147.2	1	0.000462638
213.056	multiple		135465	19875.1	2	0.000462905
211.041	10.6003	13801.6	207903	56708.9	1	0.000469595
201.056	10.4947	14040.9	113142	7341.03	1	0.000471718
324.255	12.0242	13271.8	100171	0	1	0.000477369
241.051	multiple		142227	18561.7	2	0.000507198
383.243	13.1007	13692.2	134280	12770.5	1	0.00052255
311.223	12.2248	15512.5	176449	32791.2	1	0.000539512
367.198	11.9087	27226	156838	22111	1	0.00054421
431.265	12.2663	20116.7	126545	6208.58	1	0.000545998
207.051	1.23617	16654.9	188680	36021.5	1	0.00056811
213.149	11.0945	18358	140090	8974.22	1	0.000585127
67.0197	6.0435	17762.9	139985	7162.36	1	0.00060128
139.04	9.22367	10025.2	199984	37933.8	1	0.000604404
177.02	8.46417	20553.1	270318	71880.4	1	0.000627601
187.04	multiple		225255	48395.7	2	0.000628685
149.059	8.39017	27229.7	170859	19340.1	1	0.000636494
165.092	11.0945	20149.7	164041	15629.8	1	0.000638098
152.012	7.821	17422	179874	22323.6	1	0.000652034
127.04	7.23567	27180.6	496257	186226	1	0.000653439
294.983	10.1422	19948.9	141773	1979.2	1	0.000657434
444.973	11.3957	22593	147459	3694.27	1	0.00066877
384.276	12.0242	20032.4	142070	884.919	1	0.000668908
187.04	10.389	18149	164955	12198.4	1	0.000673992
175.041	8.97267	25174.3	222649	42023.9	1	0.000674825
115.004	multiple		446434	156970	2	0.000684882
165.055	7.6835	30809	245333	49583.4	1	0.000713451
225.056	11.613	9222.44	188452	19329.2	1	0.000720433
223.062	9.64967	25095.5	217037	34073.7	1	0.00072115
108.022	6.86483	18670.1	161986	4618.2	1	0.00072951
199.076	11.1733	11000.4	263534	54538.4	1	0.000754652
269.212	12.9678	17282.3	325823	85421.9	1	0.000767663
203.108	11.2095	8884.35	213449	23630	1	0.000800031
165.055	8.31667	33748.6	251233	40227.2	1	0.000827556
132.046	9.89667	9688.62	199457	11630.6	1	0.000843632
167.071	9.82583	25672.5	217921	20460.3	1	0.000850472
101.025	2.2435	29084.2	363923	94746.7	1	0.000863531
109.03	6.195	28085.2	210845	13454.4	1	0.000881138
241.217	12.0605	20732.4	211704	12455.3	1	0.000894415
124.017	7.86983	30521.4	195953	4067.4	1	0.000896444
163.04	10.3183	20273.6	216560	12897.8	1	0.00091349
166.027	8.75633	30036.4	201545	1294.82	1	0.000948571
189.056	9.68467	22050.8	235200	15541	1	0.000978028
230.986	10.1422	30925.7	225560	6911.09	1	0.0010114
152.011	8.208	22870.9	241527	13006.2	1	0.00103148
135.046	10.3533	26220.6	250837	11510.8	1	0.00108958
109.062	6.97583	44198.6	251489	10446.9	1	0.00110247
189.092	10.742	23985.9	262672	16079.5	1	0.001104
181.072	12.4928	34222.9	248483	7166.91	1	0.00111829
159.046	9.9845	24517.6	247794	4647.41	1	0.00113816
225.056	11.0945	10433	299781	28693.6	1	0.00116491
505.374	12.0605	16084.4	281751	19276.7	1	0.00116554
367.229	14.0135	23364	247292	0	1	0.00117848
394.976	11.0593	39102.5	263537	5492.51	1	0.00120542
181.07	9.64967	37819.7	293793	20658	1	0.00121023
427.219	12.0242	46181.4	258082	2080.11	1	0.00121078
303.953	5.6275	22679.2	285546	6489.89	1	0.00130114
173.061	10.6357	28811.8	312043	17293.5	1	0.00132812
191.02	12.0605	31387.6	402858	62071.4	1	0.00134938
147.045	9.15183	61407.9	489479	104552	1	0.00137176
455.353	12.1815	27684	291168	0	1	0.00138758
165.056	10.5295	31898.5	302988	4853.9	1	0.00139929
293.212	12.8553	26625.6	431760	70930.8	1	0.00140569
227.202	12.8553	49228.3	325302	12739	1	0.00143316
135.081	9.4015	42635.7	319941	7269.96	1	0.00145788
251.094	12.0605	52586.4	354210	13969.1	1	0.00155962
163.061	1.63425	31370.5	474329	73797.3	1	0.00158221
193.051	9.50817	55372.4	448098	58373.2	1	0.00159896
163.061	1.20183	89153.6	554972	112089	1	0.0016146
279.232	13.1007	20709.7	386165	24181.8	1	0.00161804
123.009	3.67833	21270.4	360809	9748.41	1	0.00162986
281.249	13.1007	54599.8	631810	148274	1	0.00164822
94.0303	1.19567	51074.1	347637	535.054	1	0.00165176
219.066	11.7932	74135	382116	15496.7	1	0.00167857
116.973	1.093	50757.9	663291	160669	1	0.00168433
189.056	10.1422	31937.5	376105	10337.8	1	0.00169734
197.022	1.20183	80367.7	555773	100223	1	0.00172747
139.04	7.34783	66634.4	424940	30009	1	0.00174927
161.045	1.19567	68593	492469	64606.9	1	0.00175312
505.374	12.9129	31801.6	470326	51141.3	1	0.00177135
139.077	8.71933	39780.4	430167	23962.4	1	0.00182976
205.051	9.57933	34727	449209	26876.9	1	0.00189372
111.009	6.0435	60511.1	481665	28489.2	1	0.00203357
161.06	9.96667	56661.3	470139	21854.8	1	0.00203961
161.024	8.47158	105085	672515	122847	1	0.00207589
435.084	8.20517	20402.9	573209	69721.2	1	0.00209089
303.952	multiple		455144	5119.25	2	0.00212196
89.0251	1.7965	56995.5	516088	33488.6	1	0.00215167
191.019	12.7222	24547.5	854711	207993	1	0.00216163
161.008	1.208	68593	550435	50038.6	1	0.00216325
136.017	8.61083	87116.3	498208	9659.35	1	0.00228546
193.051	8.647	76995.2	509995	13547.5	1	0.0023059
163.004	8.13	49590.5	617795	67330.7	1	0.00232533
191.019	11.7203	34960.2	675522	92360.2	1	0.0023704
295.228	13.214	47345	636482	63238.3	1	0.002452
189.056	10.5295	38815.1	570510	22783.1	1	0.0025094
147.045	8.75633	112206	835130	159116	1	0.00251751
191.056	1.43558	50036	645928	58234	1	0.00254301
68.9966	multiple		4.5314e+06	2.06996e+06	10	0.00257079
133.05	1.95917	71849.7	707963	80393	1	0.00263498
163.04	7.86983	87440.2	784376	99503.7	1	0.0028235
115.04	5.557	57832.5	990786	203831	1	0.00284835
175.077	10.2477	60019.2	635698	14811.4	1	0.00289332
177.056	10.6362	30263.7	674942	29239.2	1	0.00294775
595.333	12.0242	121637	649057	0	1	0.00309311
247.061	12.3177	120789	783897	64739	1	0.00314072
203.129	10.2477	113874	688917	8614.84	1	0.00320389
179.035	9.051	84636.5	1.22528e+06	255977	1	0.0034866
303.952	4.76633	18005.5	761638	12324.9	1	0.00351635
165.019	multiple		1.15035e+06	202979	2	0.00361658
151.077	10.5295	87376.7	801927	10191.8	1	0.00372795
249.077	11.6845	124842	815428	7799.78	1	0.00381428
191.02	11.1382	37135.4	1.0088e+06	101574	1	0.00387397
111.045	6.4395	142889	946566	67422.2	2	0.00389127
163.04	9.77308	140399	968495	53473.9	1	0.00412396
125.024	multiple		1.00529e+06	39300.2	2	0.00442957
139.04	7.86983	153272	983557	25706.5	1	0.00445093
125.061	7.75817	137383	1.03641e+06	43271	1	0.00454136
535.313	multiple		970582	3921.6	2	0.00458931
149.025	multiple		1.67266e+06	339037	3	0.00485522
161.024	multiple		1.15795e+06	55032.9	2	0.0050125	161.024	8.316, 8.450, 8.833, 9.081, 9.598, 9.923	C9H6O3	7	-0.12	6+	umbelliferone or other hydroxycoumarin*
167.035	7.86983	243960	1.73383e+06	350109	1	0.00504499	167.035	7.703, 7.821, 8.048, 8.191, 8.661	C8H8O4	5	-0.03	3+	vanillic acid†
181.072	11.8722	197133	1.08446e+06	7314.16	1	0.00510081	181.072	9.573, 11.818, 11.896, 12.143, 12.624	C6H14O6	0	-1.27	4	found in blank; mannitol or sorbitol
161.061	9.6145	126472	1.371e+06	61216.6	1	0.00597096	161.061	9.502, 9.923	C10H10O2	6	-0.94	2	methoxycannamaldehyde, methylcinnamic acid, methylhydrocoumarin
277.217	13.1007	194236	1.34746e+06	25941.4	1	0.00618299	277.218	13.241	C18H30O2	4	-1.11	1	octadecatrienoic acid (likely linolenic acid)
163.04	multiple		1.78539e+06	228245	2	0.00641069	163.04	7.715, 8.086, 8.344, 8.723, 9.040, 9.281, 9.540, 9.763	C9H8O3	6	-0.14	8+	caffeic aldehyde* or coumaric acids*
191.02	multiple		1.81085e+06	192647	3	0.00685917	191.021	8.629	C7H4N4O3 or C6H8O7	8 or 3	-1.54 or -8.07	4-5	unknown; citric acid; no distinct peaks in any sample
149.061	10.1422	204815	1.70484e+06	18169.5	1	0.00795753	149.061	8.233, 9.540, 9.617, 9,961, 10.114	C9H10O2	5	-0.03	4-5	acetylanisole,* hydrocinnamic acid,* tolyacetic acid
165.056	multiple		2.02631e+06	164997	3	0.0081401	165.056	7.511, 7.684, 8.163, 8.623, 8.849, 8.967, 9.158, 9.313, 9.923, 10.076, 10.306, 10.536, 10.743	C9H10O3	5	-0.14	13+	Hydroxy-methoxyacetophenone* (apocynin, paeonol, etc), veratraldehyde,* caffeyl alcohol,* phloretic acid*
279.233	12.586	207503	1.76845e+06	19548.2	1	0.00824795	279.234	13.561	C18H32O2	3	-0.01	1	found in (aged) blank; linoleic acid
137.061	9.93167	247668	1.83585e+06	10262.6	1	0.0086545	137.061	9.684, 9.884	C8H10O2	4	0.98	2	anisyl alcohol, creosol, dimethoxybenzene,* or tyrosol
435.085	12.3603	49910.1	1.98495e+06	67353.2	1	0.00884038	435.084	12.483	C22H16N2O8	16	-2	W	found in blank; unknown
195.066	multiple		2.09016e+06	113943	2	0.00891358	195.066	8.935, 9.540	C10H12O4	5	-0.15	2	Acetosyringone*, Homoveratic acid*, 1-(3,5-Dimethoxy-4-hydroxyphenyl)ethanone*
303.953	multiple		1.94982e+06	32035.1	4	0.00899755	303.952	1.211	C7H3N3O9S	8	-1.82	4	found in blank; unknown
221.066	1.22083	362465	2.58175e+06	339058	1	0.00918736	221.066	1.178, 1.446	C8H14O7	2	0.61	1-2	dimethoxydihydroyhydropyranoic acid*t
175.04	multiple		2.21452e+06	123100	2	0.00942206	175.04	8.852, 9.139, 9.349, 9.579, 9.884, 10.337, 10.344	C10H8O3	7	0.03	7	Methoxycoumarin,* methylhydroxycoumarin
207.066	9.2945	344883	2.22501e+06	32992.8	1	0.0103001	207.066	9.202	C11H12O4	6	1.5	1	sinapaldehyde
181.051	8.75633	574382	3.6258e+06	116092	1	0.016212	181.05	8.125, 8.268, 8.664	C9H10O4	5	0.3	3	homovanillic acid*, dimethoxybenzoic acid,* or syringaldehyde*
177.055	multiple		4.19603e+06	120984	2	0.0188845	177.055	9.186	C10H10O3	6	1.16	1	coniferaldehyde†
137.024	multiple		6.48446e+06	783040	3	0.0237055	137.024	7.314, 7.663, 7.990, 8.217, 8.628, 9.224	C7H6O3	5	0.72	4-5	Salicylic acid* or Dihydroxybenzaldehyde*
123.045	8.73758	953175	5.76131e+06	9118.66	1	0.027372	123.045	8.469, 8.737	C7H8O2	4	-0.81	2	guaiacol
135.045	multiple		6.93247e+06	214102	2	0.0310693	135.045	8.782, 9.317	C8H8O2	5	-2.25 to 0.05	5	Anisaldehyde,* Acetophenone, methylsalicylaldehyde,* or methylbenzoic acid*
121.03	8.31642	986480	7.86265e+06	993.813	1	0.0374607	121.029	8.048, 8.278, 9.426	C7H6O2	5	-0.59	3	benzoic acid† and hydroxybenzaldehyde*
151.04	multiple		1.24477e+07	649868	3	0.0533476	151.04	7.836, 8.323, 8.469, 8.909, 9.579	C8H8O3	5	-0.95	5	vanillin,† methoxybenzoic acid,* hydroxyanisaldehyde*
367.265	12.9333	1.74297e+06	1.34902e+07	3885.88	1	0.0642522							in blank
109.03	6.8575	2278177	1.61071e+07	175898	1	0.0751426	109.03	6.634	C6H6O2	4	-3.37	1	dihydroxybenzene
												W=wide (4-5 min), M=multiple indistinct
											nc=not calculated

## Sheet: Eucalyptus 800C Fresh vs Aged
Eucalytpus combusted at 800 C, fresh vs aged samples
mzmed	rtmed	maxint	Fresh	Aged	# of peaks	Scaled Intensity Difference	MassHunter m/z	MassHunter rt	formula	DBE	mass diff.	# of peaks visible for m/z ratio	iden. suggested
141.017	0.926833	1.3004e+06	5.95797e+06	1.15202e+07	1	-0.0600677	141.018	0.94	C6H6O4	4	12.54	1	found in blank; kojic acid or muconic acid
96.9607	2.05875	157753	1.2605e+06	6.88247e+06	1	-0.0565431	96.992	1.857	C8H4O6	7	9	1	dihydroxyphthalic acid
100.934	multiple		3.46929e+06	7.90588e+06	3	-0.0467882						wide peak	found in fresh blank @ rt = 9.377 and aged blank @ rt = 13.059; no formulas found
255.232	13.0333	393108	291615	4.71119e+06	1	-0.0438376	255.233	11.846	C16H32O2	1	-0.43	1	found in aged blank @ rt = 13.174 and fresh euca @ rt = 11.846; palmitic acid
450.358	11.9595	123870	16464.5	1.30379e+06	1	-0.012709	450.359	12.238	C27H49NO4	4	-0.72	2	found in fresh blank @ rt = 12.844 and aged blank @ rt = 12.238
649.554	13.2112	18793.6	0	1.26436e+06	1	-0.0124681	649.554	13.356	C39H74N2O5	4	-2.61	wide peak	uncertain
262.038	10.4233	30716.6	834694	1.99845e+06	1	-0.0122069	262.039	11.186	C9H13NO6S	4	1.99	wide peak	found in both blanks; uncertain
277.181	12.3147	212693	122101	1.32588e+06	1	-0.0119776	277.181	12.506	C17H26O3	5	0.13	1	found in fresh blank @ rt = 12.285 (panaxytriol or paradol); aged blank @ rt = 12.506
305.023	0.909	367980	627919	1.77552e+06	1	-0.0118666	305.024	0.905	C13H10N2O5S	10	0.12	1	found in both blanks; uncertain
223.02	0.926833	179586	499748	1.43077e+06	1	-0.0096186	223.02	0.901	C5H8N2O8	3	1.47	1	found in both blanks; uncertain
163.04	8.66367	145018	4866.76	859881	1	-0.0084357	163.04	7.715, 8.086, 8.344, 8.723, 9.040, 9.281, 9.540, 9.763	C9H8O3	6	-0.14	8+	caffeic aldehyde* or coumaric acids*
389.289	multiple		378454	1.15562e+06	4	-0.00799522	389.29	11.632,13.60,14.65	C25H42OS or C21H42O6			1	found in fresh blank @ rt = 11.707 and aged blank @ rt = 12.659
242.176	10.977	111756	6602.35	676115	1	-0.00660796	242.176	11.334	C13H25NO3	2	1.78	2	found in both blanks; uncertain
209.095	11.2438	95135.8	705.964	607616	1	-0.00598546	209.095	11.574	C15H14O	9	10.19	multiple	found in aged blank; flavan or syringyl acetone*
265.148	13.442	52325.1	8489.69	607300	1	-0.0059124	265.148	12.538	C12H26O4S	0	0.57	1	found in fresh blank @ rt = 12.362 and aged blank @ rt = 13.498; dodecyl sulfate or laurilsulfate?
105.017	12.1039	39982.7	458206	995119	1	-0.00569586	105.018	13.174	C3H6O4	1	11.81	wide peak	found in both blanks; glyceric acid?
417.321	13.1685	41943.9	38690	586714	1	-0.00543804	417.322	12.016	C24H42N4O2	6	0.64		found in fresh blank @ rt = 12.016 (C24H42N4O2) and aged blank @ rt = 13.251 (C23H46O6)
337.236	13.0797	31057.6	5915.28	527557	1	-0.00514917	337.236	13.196	C15H34N2O6	0	-5.38	1	found in aged blank; uncertain
227.201	13.484	52323.9	9479.15	484080	1	-0.00468841							in blank
293.176	11.6428	79827.3	77804.9	529702	1	-0.00452437							in blank
194.928	2.03975	13145.6	55791	484719	1	-0.00427859
291.989	multiple		529280	895841	2	-0.00407823
100.934	11.0222	36020.5	691080	1.02304e+06	1	-0.00387869
232.975	multiple		2.93686e+06	3.05641e+06	4	-0.00375077
217.033	12.542	11524.1	306308	658571	1	-0.00374196
493.498	13.2112	8215.94	0	372718	1	-0.00367544
217.035	14.9897	37755.2	192584	532364	1	-0.00351928
291.988	0.138833	20572.9	272787	591519	1	-0.00338196
217.032	14.589	46485	93676.6	397076	1	-0.0030739
361.258	13.0333	24538.2	5465.02	314553	1	-0.00305276
105.017	13.0797	38484.4	854406	1.08704e+06	1	-0.00304224
130.944	12.8065	24703.6	139386	422045	1	-0.00290941
217.032	14.24	26425	207784	471961	1	-0.00278706
130.944	multiple		317409	566895	2	-0.00273819
299.202	12.3221	38146.1	39712.8	311284	1	-0.00271278
286.203	11.0222	41897.8	0	271861	1	-0.00268086
239.129	11.69	54351.7	83681	329059	1	-0.002493							in blank
187.098	9.4835	42032	12687.8	263627	1	-0.00248566
978.977	multiple		111943	353551	3	-0.00248057
217.033	13.694	13404	255643	475094	1	-0.00238791
412.343	12.8065	27018.5	1181.34	228666	1	-0.0022443
309.171	11.5135	36077	16592.1	227360	1	-0.00209294
179.071	8.9985	33686.2	2052.36	205281	1	-0.00200586
808.57	12.5792	5028.62	0	202681	1	-0.00199867
253.217	11.8713	14378.1	8110.98	207990	1	-0.00197815
232.976	multiple		783751	911527	3	-0.00194637
385.307	12.2697	26395.2	12890.1	206835	1	-0.00192381
291.989	multiple		671571	798315	2	-0.00183797
199.17	13.8358	23433	5929.62	191271	1	-0.00183288
317.25	13.0333	14085.1	2305.5	186918	1	-0.00182252
411.323	12.4472	24319.2	1535.27	180793	1	-0.00176903
138.019	8.7845	26463.1	1423	180105	1	-0.00176326
978.978	multiple		193012	347445	2	-0.00169192
105.018	13.602	36809	1.19175e+06	1.25307e+06	1	-0.00164834
280.062	11.3333	29332.8	1944.69	168813	1	-0.00164722
217.031	11.69	12184.2	162196	309450	1	-0.00159414
195.811	1.18	153535	981793	1.05527e+06	1	-0.0015844							in blank
170.833	14.95	5181.35	0	159861	1	-0.00157642
291.989	2.1	14664	275271	406125	1	-0.00153143
185.043	1.02783	22314.9	4038.03	158323	1	-0.00152497
375.182	10.4668	16090.2	4823.47	148242	1	-0.0014185
157.123	12.1259	35770.5	80591.7	215910	1	-0.00140498
661.611	12.762	9284.16	0	134459	1	-0.00132592
219.028	10.157	21800.1	175442	293940	1	-0.00132216
233.154	12.3848	25122.3	79793.6	205496	1	-0.00130945
232.977	7.018	21838.7	50854.9	178929	1	-0.00130749
173.082	8.66367	19198.4	5644.46	137305	1	-0.00130327
697.441	13.1685	3490.48	828.82	125180	1	-0.00122698
655.422	14.2565	4710.23	0	122678	1	-0.00120975
479.481	13.1258	2110.15	625.304	123205	1	-0.00120933
674.609	12.0488	4615.68	0	118456	1	-0.00116811
229.884	1.161	15719.4	32014	147590	1	-0.00116775
664.079	12.5792	6993	0	112115	1	-0.00110559
262.038	14.6247	19210.4	143990	238043	1	-0.00105357
360.261	13.0797	9830.57	2442.78	107845	1	-0.00104153
689.636	multiple		0	104585	2	-0.00103133
100.934	10.6487	31066.4	341059	414658	1	-0.00102445
465.466	13.1685	4538.02	0	103241	1	-0.00101808
161.061	11.0222	14094.8	2581.34	104067	1	-0.00100302
221.902	1.177	27910.5	46675.3	142033	1	-0.000981211
201.038	0.926833	12692.9	34266.8	128312	1	-0.000957408
359.184	12.3147	16653.7	6460.11	102778	1	-0.000955468
301.217	13.1258	9110.82	1467.33	96853	1	-0.000941899
661.609	13.3463	10315.8	0	93246	1	-0.000919514
719.652	13.3028	8801.12	0	91249.7	1	-0.000899828
239.06	11.3699	15663.7	27004.7	115555	1	-0.000896853
978.978	1.832	3587.5	76530.7	160572	1	-0.000895765
297.154	12.542	11456.7	94739	176683	1	-0.000891033
978.977	multiple		77220.8	160498	2	-0.000888839
253.217	12.3147	6648.84	4486.29	93742.4	1	-0.000884098
478.984	0.909	20738.3	48272.1	133489	1	-0.000882611
228.16	10.4233	15557.4	0	88079.5	1	-0.000868567
978.977	multiple		47809.8	129495	2	-0.000847383
444.974	12.5355	5802.59	7571.8	91896.9	1	-0.000838175
145.051	6.63783	16290.4	73902.6	151795	1	-0.000832832
165.04	12.9372	12678.3	44378.9	124662	1	-0.000830553
190.018	13.649	5980.45	116782	190023	1	-0.000824503
978.978	10.218	8200.21	64964.3	142255	1	-0.000819066
978.977	6.902	4459.17	94400.8	168960	1	-0.000817909
297.244	13.442	10116.6	4108.67	86074	1	-0.000811872
226.182	11.0222	12598.6	0	80794.8	1	-0.000796731
154.015	7.94883	8985.5	0	80787.8	1	-0.000796662
150.001	9.44033	10632.8	24619.8	102610	1	-0.00079064
591.57	13.0333	8278.84	0	77591.9	1	-0.000765146
309.204	13.5272	7490.8	718.892	78058.5	1	-0.000763288
262.038	12.1593	17704.8	119631	186081	1	-0.000760047
297.243	12.5792	11456.7	92183.4	160368	1	-0.000753108
978.976	11.535	11007.8	38044.6	109618	1	-0.000739111
664.072	13.4111	12995.8	73007.3	141171	1	-0.00073611
697.438	12.4022	2793.9	1716.28	75001.4	1	-0.00072418
394.976	11.7367	8180	7389.13	80168.4	1	-0.000724159
978.976	5.003	3599.21	66765.4	131894	1	-0.000700711
978.979	7.599	4802.53	92682.7	155465	1	-0.000700274
533.454	13.0797	6959.75	0	69926.6	1	-0.000689558
160.842	1.199	34668.4	154392	210482	1	-0.000688311
446.312	12.2258	7444.68	0	67399.5	1	-0.000664638
395.244	11.782	12494.7	650.32	67680.8	1	-0.000661568
131.013	multiple		182495	233311	2	-0.000660921
299.005	0.9475	24171.5	27785.9	92282.9	1	-0.000660349
613.539	13.1258	5576.25	0	66538.6	1	-0.000656148
456.993	14.7037	2265.19	0	66167.2	1	-0.000652486
185.875	1.199	15457.2	33133.4	95841.7	1	-0.000647394
189.033	12.813	3622.56	48832	109486	1	-0.000640883
978.978	10.993	9355	39940.6	101219	1	-0.00063925
313.078	12.1818	12090.9	16446.8	79543.7	1	-0.000636612
719.653	12.6487	8531.32	0	64183	1	-0.000632919
221.852	1.183	27910.5	135373	186723	1	-0.000624923
275.113	8.86617	9469.42	11655.8	73773.2	1	-0.000622758
241.217	12.894	7453.87	8297.08	70629.7	1	-0.000621938
140.967	1.908	4286.24	13701.3	75297.6	1	-0.00061941
271.228	12.9922	10491.7	25405.2	85670.5	1	-0.000616534
398.266	8.02417	8680.03	0	62262.3	1	-0.000613979
273.078	11.0222	8107.48	4744.6	65943.1	1	-0.000607643
337.215	12.4022	7382.02	24117.8	81967.6	1	-0.000591587
664.078	14.1298	6799.34	0	58813.5	1	-0.00057997
661.612	12.4022	7948.57	0	57531.6	1	-0.000567328
149.046	1.2195	7677.01	15146.6	69527.7	1	-0.000549526
431.052	0.944667	5291.96	538.558	55496.8	1	-0.000542424
339.201	13.602	10854.8	55786.8	105135	1	-0.000535482
325.15	11.458	3371.32	18174.9	70678.4	1	-0.000533662
405.227	12.4472	6223.78	0	53996	1	-0.000532464
381.207	12.4908	8390.27	7960.97	61228.5	1	-0.000532252
401.13	11.1103	2731.22	5442.49	58740.6	1	-0.000530348
390.966	14.8685	4173.65	2432.51	54917.4	1	-0.000519692
269.212	multiple		58117.6	105553	2	-0.000518668
493.498	12.4022	5121.56	0	51939	1	-0.000512179
185.042	13.2593	5124.14	0	51933.1	1	-0.000512121
314.977	14.3872	2587.23	6886.34	56352.3	1	-0.000493823
232.046	11.5577	8607.38	34509.7	80960.4	1	-0.00048828
383.205	12.3147	8775.71	9144.62	57614.1	1	-0.000485974
269.139	9.21467	8230.56	4743.31	52567.3	1	-0.000475754
128.035	1.90783	3877.03	5758.34	53191.9	1	-0.000472793
207.012	8.94475	7002.76	24575.8	69646	1	-0.000465967
267.197	12.5792	8115.92	9499.77	55541.6	1	-0.000462346
380.977	12.5792	3011.31	3398.16	49639.6	1	-0.00045897
589.518	12.4022	2616.59	0	46312.1	1	-0.000456692
595.059	0.944667	4559.33	0	45378.8	1	-0.000447488
395.39	13.1685	2245.37	0	45178.4	1	-0.000445512
223.134	11.2438	7758.56	2590.01	47508.3	1	-0.000445215
171.139	12.5606	15000.1	74630.3	112889	1	-0.000442627
494.384	12.0037	3376.46	0	44784	1	-0.000441623
465.468	12.762	4379.47	0	43896.2	1	-0.000432868
519.33	12.4908	4474.39	1607.55	45190.2	1	-0.000431183
605.585	13.1685	5626.28	0	43680	1	-0.000430736
344.979	11.0222	6997.13	34738.3	75175.8	1	-0.000429183
280.982	11.0222	6297.48	12348.5	54537.6	1	-0.000426848
410.325	12.8497	5178.73	915.219	43972	1	-0.000425392
464.338	11.1997	4727.63	0	43116.9	1	-0.000425183
193.086	10.977	8321.35	8887.07	50609.6	1	-0.000419216
201.113	10.3642	10687.6	38152.3	77206.2	1	-0.000418528
513.056	0.944667	4191.05	0	42329.2	1	-0.000417416
204.943	13.6527	2315.21	9554.78	50916.7	1	-0.000416244
401.13	12.5355	1820.56	2132.3	44115.1	1	-0.000415866
215.129	10.928	7027.89	25918.8	65514.2	1	-0.000413155
315.161	10.4668	5770.38	8859.67	49614.2	1	-0.000409646
190.019	multiple		87045.9	120833	2	-0.000409412
221.118	10.9318	8916.1	19588	59337.1	1	-0.000409126
487.304	12.4908	4443.26	1407.82	42476	1	-0.000406213
204.052	14.075	2519.87	43020.4	79043	1	-0.000392899
374.22	8.02417	5261.06	0	39341.4	1	-0.000387952
167.035	7.5695	5469.49	1432.44	39265.5	1	-0.000374333
283.037	0.909	6781.54	8101.82	45302.4	1	-0.000373936
213.186	12.0928	4976.14	5963.19	41815.9	1	-0.000358772
299.08	11.782	6070.87	2253.95	38139.6	1	-0.000355848
392.207	13.0333	2265.66	929.751	36777.3	1	-0.000354313
333.227	13.484	3678.96	705.628	36292.6	1	-0.000351547
315.18	11.4682	6713.34	2752.91	37372.2	1	-0.000343797
463.009	0.947	6513.42	11892.8	45648.8	1	-0.000343289
131.013	13.3028	5440.41	34696.7	66009.2	1	-0.000339163
216.935	0.833167	10181.1	6633.89	39991.2	1	-0.000334751
249.149	13.442	5081.57	6647.21	39826.3	1	-0.000333005
362.982	0.926833	4638.06	13233	45189.2	1	-0.000326714
357.116	8.86617	4055.74	1589.42	33899.8	1	-0.00032001
197.808	1.42667	9392.26	8774.19	39867.3	1	-0.000314298
316.254	13.0333	2872.2	0	31819.4	1	-0.000313776
166.051	10.4668	4829.85	4476.92	35897.9	1	-0.000313768
137.025	6.96675	5388.18	5183.23	36116.9	1	-0.000309581
171.066	6.90217	3935.67	3568.57	34411	1	-0.000307268
330.98	11.7367	4109.58	12851.4	42598.2	1	-0.000304593
423.1	11.4682	3400.1	1585.17	31937.3	1	-0.000300696
325.185	13.169	32263.4	271608	277494	1	-0.000295893
261.133	9.12883	5546.4	7834.91	36937	1	-0.000293842
405.193	9.96883	3631.32	10552	38547.8	1	-0.000285312
179.056	1.183	3828.76	3041.86	31520.3	1	-0.000283494
560.989	0.947	7682.61	15002.4	41682.1	1	-0.000276231
978.974	4.421	3722.24	27663.4	53048.2	1	-0.00027455
230.064	11.782	1804.06	14227.8	40628.7	1	-0.000272803
221.082	10.6948	5377.18	7115.97	33594.5	1	-0.000267341
381.008	0.947	4560.64	13637.8	39173	1	-0.00026375
201.027	14.7263	5661.37	0	26673.9	1	-0.000263036
160.998	1.183	5038.25	4792.14	31036.2	1	-0.000262993
371.217	10.5117	2492.41	11168.6	36698.5	1	-0.000261534
131.013	12.894	4753.79	19486.8	44232.1	1	-0.000261083
225.185	11.6913	3138.9	1337.52	27681.8	1	-0.000260956
313.19	13.0797	2734.16	2598.57	28591	1	-0.000258592
401.129	13.878	1955.08	2772.72	28519	1	-0.000256317
148.028	14.3477	2530.24	41436.2	63502	1	-0.000253882
282.981	11.9595	2380.5	0	25530.2	1	-0.000251757
204.938	13.0333	2334	3305.06	28394.6	1	-0.000250307
401.128	14.6632	1858.23	10873.5	35133.3	1	-0.000248752
467.31	12.2697	3553.97	1349.91	26121	1	-0.000245454
325.2	11.886	3378.79	16745.3	40131.3	1	-0.000245277
591.569	11.9595	2776	0	24048.2	1	-0.000237144
289.219	13.484	2388.85	0	23866	1	-0.000235346
197.045	7.79	3276.13	0	23768	1	-0.00023438
204.943	14.7448	1653.5	26261.2	47529.7	1	-0.00023273
227.165	11.767	4278.27	9034.26	31305.3	1	-0.00022753
221.081	8.3535	3433.9	6060.81	28550	1	-0.000227078
110.976	14.3872	3529.35	229155	231724	1	-0.000226009
345.17	10.0152	3192.01	5488.84	27531.8	1	-0.000222176
397.261	13.0333	3112.44	7962.41	29667.3	1	-0.000221009
599.521	12.9372	2514.22	0	22248.8	1	-0.000219399
614.952	13.1685	1840.27	0	22105.5	1	-0.000217986
501.244	12.9802	2263.03	0	21937.9	1	-0.000216334
396.981	0.927417	7584.41	33305.8	52051.2	1	-0.000214019
143.108	11.6428	7617.88	38132.7	56292.3	1	-0.000212468
269.088	10.7398	5326.39	46200.2	63596	1	-0.000212002
232.976	multiple		300644	295348	2	-0.000211054
137.025	7.61217	3419.01	6249.21	27033.9	1	-0.000210434
989.32	12.8065	2817.54	803.886	21551.6	1	-0.000205301
391.176	11.5135	4276.08	8251.1	28334.7	1	-0.000205273
175.022	10.875	8442.44	37196.3	54488.6	1	-0.000203096
978.973	0.559	3799.84	24016.7	42177	1	-0.000200114
261.024	3.59467	3927.26	6457.65	26034.7	1	-0.000198708
184.883	1.23625	3206.56	20685.3	38979.2	1	-0.000198513
228.886	1.18	3325.2	10515.3	29576.1	1	-0.00019717
239.201	13.0797	2460.53	0	19422.2	1	-0.000191525
795.671	13.1258	2575.42	0	19399.7	1	-0.000191304
401.129	11.9374	2145.17	0	19391.5	1	-0.000191223
135.046	9.96883	3797.17	8039.02	26640.3	1	-0.00019047
247.894	1.183	3820.89	3686.95	22664.3	1	-0.000190368
495.285	12.4908	3326.64	0	19203.4	1	-0.000189368
164.836	1.183	6662.9	25645.3	41947.6	1	-0.000183218
187.869	1.2955	4029.43	19727.3	36476.3	1	-0.00018244
202.964	1.68067	2705.24	17201.8	33758.9	1	-0.000178337
130.018	multiple		63888.4	75993	2	-0.000175314
243.196	13.2593	2950.45	0	17463.5	1	-0.000172211
425.282	12.3147	2277.71	9774.09	26292.5	1	-0.00017145
229.144	11.2892	3437.58	6527.19	23019.6	1	-0.000168351
204.943	14.0862	2994.23	3401.86	20158.3	1	-0.000168217
978.982	0.909	4227.01	18277	33508.5	1	-0.000166206
401.126	10.2003	1724.33	1000.27	17684.5	1	-0.000165402
314.976	14.9897	2384.29	1827.01	18251.5	1	-0.000163564
195.062	8.66367	3386.7	1732.23	18155	1	-0.000163465
404.23	12.4472	1710.18	675.193	16995.8	1	-0.000161531
125.044	0.926833	5125.61	25341.6	39174.8	1	-0.000158604
267.196	12.9802	2655.57	2333.32	18091.2	1	-0.000157434
472.967	14.7658	1728.59	2476.31	17998.4	1	-0.000155234
395.389	12.4472	1606.76	0	15631.6	1	-0.000154146
305.195	13.8358	2411.99	892.683	16397.1	1	-0.000153673
337.3	13.2593	2198.62	0	14901.5	1	-0.000146946
189.076	6.351	2600.39	10843.8	24780.3	1	-0.000146926
103.002	13.6942	3497.33	113742	118365	1	-0.000145195
130.017	14.394	3367.57	25332.3	37477.5	1	-0.00014195
448.967	13.7868	933.445	867.766	14966.7	1	-0.000139792
163.061	1.183	3083.65	3704.54	17481.1	1	-0.000139097
271.079	7.5695	1674.28	6127.34	19584	1	-0.000138064
978.976	6.244	3874.33	21395.5	33454.3	1	-0.000137651
319.122	8.90767	3214.89	10982.2	23750.3	1	-0.000135526
359.26	13.0333	1795.14	0	13691.1	1	-0.000135011
237.112	10.786	2293.91	1840.94	15263.4	1	-0.000133973
77.0401	9.0415	1657.03	0	13464.9	1	-0.00013278
187.133	10.3775	2844.93	9212.11	21768.9	1	-0.000131892
447.189	10.2003	2030.85	2814.69	15532	1	-0.000127873
153.02	6.11333	2192.96	745.399	13534.3	1	-0.000126766
313.108	10.4001	2300.13	0	12566	1	-0.000123916
190.018	14.317	4325.85	30522.7	40253.7	1	-0.000122689
227.165	12.235	1205.67	25797.2	35897	1	-0.000122186
565.551	12.4472	2055.78	0	11905.6	1	-0.000117403
478.39	12.4022	2563.63	67050.8	72984.9	1	-0.000117235
210.901	1.908	4059.41	12434.1	23076.9	1	-0.00011584
430.264	13.0333	1504.23	0	11674	1	-0.000115119
131.035	5.25967	2866.14	15536.8	25730	1	-0.000114123
135.03	1.183	2023.35	747.491	12104.4	1	-0.000112647
549.319	12.2258	1603.89	1247.62	12557.5	1	-0.000112621
490.964	11.782	1142.84	0	11323.8	1	-0.000111666
148.027	14.7448	2648.72	30156.6	38785.7	1	-0.000111502
558.331	13.2112	887.408	0	11177.7	1	-0.000110225
92.9285	1.177	9947.71	30302.4	38734.3	1	-0.000109685
220.855	1.183	2784.88	13264.6	22570.4	1	-0.000103382
192.957	14.95	3705.5	13914	23093.6	1	-0.000102706
172.958	1.07017	4020.42	16097.2	24833.6	1	-0.000100248
343.035	14.2145	1286.06	3476.92	12946	1	-9.64211e-05
230.981	14.787	2457.39	45213.1	50816.2	1	-9.48475e-05
231.044	5.52917	2881.62	11749.1	19428	1	-8.60113e-05
383.182	12.1378	3078.1	9773.64	17523.8	1	-8.49843e-05
362.131	8.86617	1406.08	4370.58	12344.5	1	-8.246e-05
395.386	11.782	870.407	0	7647.66	1	-7.54148e-05
129.092	10.9624	3759.89	22013	27601	1	-7.43816e-05
351.138	10.4668	1678.8	4306.1	11415.4	1	-7.38773e-05
314.979	0.928	5336.11	22760.5	27773	1	-6.93612e-05
207.101	11.0662	1854.68	4339.48	10888.6	1	-6.83822e-05
978.975	2.681	3128.04	13835.4	19384.6	1	-6.6838e-05
451.549	12.0037	944.739	0	6739.36	1	-6.6458e-05
173.118	10.722	3071.61	20533.1	25235.5	1	-6.4353e-05
187.134	11.4563	4036.2	25118.7	29173.8	1	-6.19848e-05
176.993	1.183	1405.74	7452.76	12919.2	1	-6.0432e-05
289.069	8.66367	1925.33	6384.69	11911.1	1	-6.00882e-05
357.174	11.3333	2621.87	10682.3	15292.7	1	-5.48181e-05
255.823	1.177	6671.58	23187.7	26589.1	1	-5.38476e-05
455.995	0.947	2441.54	15231.5	19109.6	1	-5.15812e-05
165.038	14.2985	2210.65	17245.2	20750.1	1	-4.96651e-05
161.043	1.183	2029.37	8643.92	12725.2	1	-4.78162e-05
363.146	11.646	1064.11	4229.31	8657.43	1	-4.73702e-05
477.247	11.8262	1187.41	2985.82	7182.01	1	-4.39941e-05
185.154	12.951	5346.23	27856.4	29815.9	1	-4.37172e-05
149.062	11.032	2016.56	11202.6	14555.2	1	-4.28715e-05
358.042	14.432	1102.31	11445.4	14199.5	1	-3.71816e-05
149.994	14.6247	2124.33	24401.2	25473.2	1	-3.19397e-05
99.0091	6.11333	2373.14	11612.5	13667.4	1	-3.04328e-05
134.895	1.832	1907.06	11665.2	13289.7	1	-2.62352e-05
345.057	10.489	3180.31	15685.9	16212.4	1	-1.89282e-05
205.05	8.9985	4950.42	32708.6	31723.2	1	-1.89271e-05
241.217	12.159	3661.91	43238.5	41083.6	1	-1.66148e-05
103.002	14.1722	3153.73	28077.5	26699.1	1	-1.09953e-05
320.061	9.25933	1789.04	28975.7	26896.5	1	-4.87192e-06
104.021	13.826	17629.7	233339	212929	1	-3.07324e-06
165.037	13.878	2239.28	29577.8	26045.7	1	8.92818e-06
273.827	1.177	410	2733.92	532.297	1	1.93164e-05
291.194	12.766	1375.44	11753.3	8722.5	1	1.9595e-05
315.217	11.925	1217.25	12999.5	9760.53	1	2.05556e-05
253.144	11.264	1841.44	9493.75	6560.32	1	2.06131e-05
193.815	1.215	3429.45	29025.6	24202.4	1	2.21438e-05
206.935	1.215	617.32	6824.77	3903.51	1	2.28304e-05
168.066	6.747	409.453	3694.17	0	1	3.31937e-05
350.048	14.67	1079.46	8153.56	4035.65	1	3.3467e-05
171.103	9.61217	12120.1	112691	99039.9	1	3.59319e-05
165.038	14.7856	2129.46	22630	16961.4	1	3.60816e-05
104.021	multiple		183675	163464	2	3.84573e-05
219.853	1.183	8893.12	33081.9	25904.2	1	4.18093e-05
161.005	1.87	1268.92	8959.88	3871.91	1	4.23269e-05
299.185	11.343	2191.44	21798.7	15541.4	1	4.26143e-05
245.895	1.258	2231.86	19780.2	13644.6	1	4.31824e-05
219.123	8.255	2955.57	34011.9	26393.5	1	4.53409e-05
358.039	14.946	1365.39	10630.8	4895.2	1	4.72496e-05
594.963	12.273	2343.59	49540.6	40293.5	1	4.78026e-05
182.009	9.334	2581.15	28899.6	21134.5	1	5.12649e-05
341.232	12.12	5420.18	30941.1	22903	1	5.21692e-05
175.096	8.216	1882.16	11440	4849.67	1	5.49703e-05
201.802	1.199	6928.17	54990.8	44475.5	1	5.55358e-05
138.024	9.41	1645.56	11230.7	4430.35	1	5.72246e-05
215.165	12.159	2894.68	17599.7	9868.82	1	6.08232e-05
263.852	1.177	2047.12	15425.7	7568.84	1	6.39695e-05
363.056	10.913	1710.68	10988	3336.5	1	6.58301e-05
419.239	0.947	1074.06	10668.1	2950.6	1	6.67609e-05
305.176	11.4965	2194.17	18352.4	9660.87	1	6.96365e-05
179.841	1.218	1339.09	17799.2	8630.93	1	7.48221e-05
295.003	1.024	1437.15	11593	2704.8	1	7.74953e-05
197.117	10.837	2118.58	13790.8	4113.76	1	8.33501e-05
183.102	10.913	2040.27	11662	2139.12	1	8.36938e-05
277.912	1.215	1310.39	11033.5	1541.86	1	8.39366e-05
247.12	8.40333	2793.08	25459.8	14435.9	1	8.64127e-05
213.185	11.65	2344.22	24169.5	13005.4	1	8.89259e-05
430.973	11.728	1245.89	13463.5	3225.36	1	8.91697e-05
204.052	14.6695	2013.61	14105.5	3171.66	1	9.54679e-05
287.188	11.573	3021.06	16379.8	4933.08	1	9.85336e-05
159.012	1.832	2216.47	14387.6	2937.43	1	0.000100312
647.011	0.909	1523.52	12763.8	1444.53	1	0.000100444
716.334	12.159	1484.82	11979.3	0	1	0.000107639
103.002	14.7037	3640.25	44262.7	29250.5	1	0.000109276
331.159	10.218	2444.02	19280.7	6419.77	1	0.000109939
965.997	14.4277	2095.72	35717.2	21263.5	1	0.000111252
315.253	12.712	5366.48	43560.1	26668.3	1	0.000128426
601.301	12.197	1890.16	16315.1	1189.7	1	0.000134866
181.085	7.25817	9616.81	63941.6	44518	1	0.000135544
445.2	12.082	2867.88	16431.3	1156.26	1	0.00013624
173.083	9.143	5038.33	38445.6	20871.2	1	0.000139636
383.192	11.728	3421.14	20190.1	4046.13	1	0.000141518
301.001	0.989167	9026.17	72282.7	51380.2	1	0.000142823
248.96	0.985	2817.45	16679	684.192	1	0.000143121
545.275	12.159	2859.29	17448	1072.69	1	0.0001462
473.221	11.925	2931.84	18367.4	1196.21	1	0.000153243
185.081	8.255	6166.38	55798.9	34982.6	1	0.000156409
285.208	12.365	5309.3	43532.5	23714.7	1	0.000157304
283.192	11.728	3156.78	27327.3	8776.67	1	0.000158999
281.173	13.878	4336.73	47760.5	27310.8	1	0.000159832
79.958	1.87	3412.92	19513	1330.35	1	0.000162214
185.119	11.032	4468.22	33842.7	14218.8	1	0.000163877
319.002	0.947	2178.37	20700.6	2044.94	1	0.000165838
199.134	11.148	3162.83	27608.6	8104.77	1	0.000168153
255.011	0.947	2849.54	25103.5	5391.56	1	0.000172398
345.228	12.235	3154.82	23710.3	3934.9	1	0.000174245
283.102	11.42	4620.48	30734.3	10315.4	1	0.000174439
243.16	11.6322	3787.38	45408.7	23364.6	1	0.000177614
313.238	12.304	5519.05	56185	33103.4	1	0.000178409
211.133	11.573	5520.44	26582.1	5395.33	1	0.000185648
422.329	12.197	1156.92	21089.3	0	1	0.000189496
196.886	1.87	4422	24892.4	3272.69	1	0.000191397
333.077	11.925	4608.4	29027.5	6745.19	1	0.000194309
177.128	13.08	5471.1	38791	15228.3	1	0.000198385
104.021	12.082	17799.2	314500	265849	1	0.000204338
241.885	1.215	2847.02	26262	2458.33	1	0.000211734
245.14	10.915	4692.65	44219	18793	1	0.000212006
215.905	1.292	3847.42	27110.9	2404.15	1	0.000219895
544.967	11.963	2719.42	27403.6	2246.82	1	0.000224077
417.192	11.496	5247.55	47034.7	19251	1	0.00023279
207.049	1.06083	6295.15	41972.4	14478.4	1	0.000234366
337.237	0.985	3129.16	39701.8	10910.2	1	0.00024915
381.243	14.24	2871.63	32884.6	4381.57	1	0.000252275
259.048	14.278	6777.45	142234	103892	1	0.00025354
223.082	12.159	4859.49	42359	11371.9	1	0.000268474
100.934	10.2437	28815	496391	424554	1	0.000273691							in blank
311.222	11.767	5199.16	41111.5	9617.53	1	0.000274565
385.207	11.846	5579.62	41867	9477.14	1	0.000282738
259.154	8.987	3002.74	44875.1	12011	1	0.00028478
403.175	9.602	4541.58	35296.9	2439.53	1	0.000293101
965.995	14.787	2750.13	54940.6	20280	1	0.000293681
236.998	0.985	3367.77	36253	2367.61	1	0.000302402
517.301	12.159	6403.37	39307.9	4956.6	1	0.000304321
652.228	1.908	5128.75	71627	34159.9	1	0.000306744
806.215	12.673	3190.5	34305.2	0	1	0.000308247
115.037	9.835	2057.54	67008.9	29456.2	1	0.000311631
273.097	8.639	6364.02	41898.3	5432.5	1	0.000322904
803.069	13.392	2639.42	38804.6	1484.6	1	0.000334036
235.918	1.215	3019.09	37897	0	1	0.000340521
159.103	10.333	6574.58	49039.9	9127.38	1	0.000350638
215.023	1.139	7700.5	51835.9	9475.21	2	0.000372331
615.993	12.712	2786.41	41727.8	0	1	0.000374942
249.978	multiple		856043	741655	2	0.000378333
494.969	11.69	4250.39	43530.7	1224.16	1	0.000379071
194.989	0.926833	7312.91	68012.9	23169.7	1	0.000382646
187.097	9.912	9519.65	70087.7	24852.1	1	0.000384697
199.098	8.987	6653.17	50786.6	7255.58	1	0.000384791
279.233	12.712	6053.41	58886.6	13581.8	1	0.000395189
341.182	12.004	8000.94	51545.9	5434.81	1	0.000409569
261.041	14.984	12129.8	106483	55190.7	1	0.000412552
277.861	1.253	5667.92	48983	1526.96	1	0.000425076
982.992	5.738	14790.5	189581	129156	1	0.000429842
380.976	11.382	7436.2	53881.4	5184.66	1	0.000433021
309.208	11.8787	7052.52	62901.7	13301.3	1	0.000434033
665.375	12.312	5273.78	57123.7	7799.01	1	0.000436373
315.885	1.177	6171.4	52829.5	2454.85	1	0.000450488
505.302	12.197	7391.38	58366.3	6447.37	1	0.000460868
259.119	9.642	8694.12	69468.3	14415.6	1	0.000482049
127.001	0.909	5439.64	56123.9	1858.1	1	0.000485975
381.062	9.95	8858.15	55533.4	747.766	1	0.000491618
435.198	10.76	8723.04	56828.2	1020.19	1	0.000500566
156.991	0.909	9539.14	60155.1	3765.22	1	0.000503391
505.372	12.159	6672.56	88664	28667.1	1	0.000513993
455.251	12.635	9385.88	61055.2	3393.76	1	0.000515141
105.018	10.5565	36893	408950	320200	1	0.000517053
982.993	5.118	14278.8	155510	88621.7	1	0.000523414
227.203	12.998	13807	86473.1	23368.4	1	0.000546559
561.309	11.846	9239.03	63110.1	0	1	0.000567071
307.19	11.7807	6772.23	143079	71065.2	1	0.000584844
409.208	10.566	10916.7	68823.5	1845.9	1	0.000600206
371.245	12.0225	11642	72327.1	3722.22	1	0.000613185
215.024	1.832	10368	74466.9	3973.37	1	0.000629935
708.07	13.257	4616.37	74072.3	1414.51	1	0.000651623
230.986	10.0682	31497.4	239357	150682	1	0.00066482
224.919	9.758	11262.3	75829	679.826	1	0.000674652
245.14	multiple		121830	40843.4	2	0.00069193
165.02	7.716	10466.6	142224	59210.4	1	0.00069406
437.239	11.458	12750.2	81756.9	4092.73	1	0.000694262
449.1	12.042	8068.79	77847.9	0	1	0.000699497
159.065	7.74667	7778.17	251321	155943	1	0.000720448
130.944	9.72	17899.1	234990	140470	1	0.000726292
257.879	1.177	12994.9	83123.8	1561.06	1	0.000731509
311.223	12.312	11108.7	169375	79645.4	1	0.000736509
245.14	12.159	13982.4	102847	17966.4	1	0.000746957
565.322	12.197	9332.4	84483.2	1092.42	1	0.000748345
736.136	12.998	9306.06	85357.8	0	1	0.000766977
293.209	13.0619	9124.64	118967	27512.4	1	0.000797664
116.929	1.832	21345.7	249958	146106	1	0.000805207
213.15	11.186	13736.6	134091	34221.5	1	0.000867405
311.169	12.813	30632.3	254929	143823	1	0.000872382
330.98	10.993	18675.6	120132	19052.8	1	0.000891556
215.023	multiple		103350	3562.12	2	0.000893516
637.343	11.925	10017.8	100966	1030.72	1	0.000897057
329.233	11.458	8226.47	152288	45874.1	1	0.000916001
431.265	12.365	17000.2	111286	7319.09	1	0.000927783
215.023	multiple		118738	10847.7	2	0.00095994
367.197	12.159	23311.4	145737	27763.1	1	0.00103574
247.027	12.411	9870.26	120876	0	1	0.00108612
450.359	12.766	12540	218763	86687.3	1	0.00111084
551.308	11.807	23826.6	124773	0	1	0.00112114
294.982	10.027	20272.2	153008	23739.5	1	0.00114074
444.973	11.382	16387.8	137116	5166.09	1	0.0011811
265.148	12.449	24933.2	142625	9020.52	1	0.00119259
434.1	7.404	7177.24	132833	0	1	0.00119356
199.17	13.479	21422.4	164171	28158.7	1	0.00119747
391.094	12.042	11592.3	138339	2510.85	1	0.00121827
505.375	13.257	15348.3	191149	42514.6	1	0.00129831
244.985	9.026	6654.46	198494	47116.2	1	0.00131894
247.026	11.573	16887.7	172745	1097.85	1	0.00154137
623.365	12.635	26980.2	174073	0	1	0.00156412
433.113	11.728	12678.4	182138	6968.42	1	0.00156788
433.115	10.875	11675	190776	12509.4	1	0.00159085
151.061	0.794	22200.6	187456	628.74	1	0.00167818
279.907	1.253	13707.6	197316	9600.25	1	0.0016783
303.952	1.215	17993	188198	1186.99	1	0.00167934
535.313	12.635	24759.6	189121	0	1	0.00169934
247.027	12.906	7133.74	201382	5515.52	1	0.00175512
280.983	10.604	30508	224640	15302.1	1	0.00186759
982.992	multiple		509086	262502	2	0.00198578
391.094	12.998	13829.8	227169	2869.16	1	0.00201292
129.056	7.172	14236.6	293538	59338.7	1	0.00205242
394.976	10.993	37226	236600	1061.2	1	0.00211549
168.03	9.38975	23258.6	281563	41654.6	1	0.0021192
427.219	12.159	38132.2	244705	3453.46	1	0.00216472
295.229	13.0797	31299.4	296114	47891.3	1	0.00218845
367.229	14.075	26031.3	252905	7389.62	1	0.00219959
344.98	10.604	36912.9	267263	11282.6	1	0.00229021
417.074	13.212	27970.5	325842	49489.7	1	0.00243981
247.025	7.599	12737.3	287660	10203.6	1	0.00248413
191.016	14.5072	30407.7	328920	45563.4	1	0.00250619
982.993	multiple		1.82138e+06	1.39152e+06	3	0.00264392
116.972	1.07017	32470.9	463216	152677	1	0.00265663
434.101	14.589	8303.24	319360	10176.7	1	0.00276923
505.375	12.859	13421.3	482339	155454	1	0.00280107
631.31	12.159	65678.4	333451	0	1	0.00299621
152.035	9.96883	40641.5	531066	175142	1	0.00304476
247.025	9.334	23706.6	353723	7608.33	1	0.00310332
247.025	multiple		400214	9098.55	2	0.00350637
417.073	12.4735	29816.8	534246	68621.6	1	0.00412374
247.026	11.186	22189.9	517130	14926.3	1	0.00449944
203.129	multiple		600585	23550	2	0.00516429	203.129	10.218	C10H20O4 or C11H8O4	1	0.14	1	found in fresh blank; 3,10-dihydroxydecanoic acid or dihydroxynephthelene-carboxylic acid
191.017	13.5692	25039.2	778154	179118	1	0.00522573						wide peak	found in both blanks; no distinct peak
595.334	12.159	95933.2	639436	0	1	0.00574561	595.333	12.132	C28H52O13	3	0.13	1-3	found in fresh blank
303.952	0.482	17075.6	789948	0	1	0.00709803	303.952	1.211	C7H3N3O9S	8	-1.82	4	found in blank; unknown
535.312	12.159	123979	796147	2560.3	1	0.00712848	535.312	12.12	C26H48O11	3	0.21	3	found in fresh blank
247.025	multiple		884826	24178.3	2	0.00771212	247.025	10.031	C12H8O6	9	0.48	wide peak	found in fresh blank
417.074	multiple		1.03692e+06	154985	2	0.00778886	417.073	12.599	C22H14N2O7	17	-1.75	wide peak	found in both blanks
617.169	13.257	9267.38	948597	0	1	0.00852355	617.169	13.191	C21H34N2O19	6	-0.59	wide peak	found in fresh blank
666.06	multiple		1.80099e+06	773222	2	0.00855781			too many options			1	too many options
181.072	multiple		1.29065e+06	14730.2	2	0.0114518	181.072	9.569	C6H14O6	0	-1.27	4	found in blank; mannitol or sorbitol; trimethoxytoluene or dimethoxy ethyl phenol
982.992	multiple		2.39785e+06	930839	5	0.0123666						wide peak	no formula found
68.9965	multiple		1.44137e+07	6.52178e+06	10	0.0652011						wide peak	found in both blanks; no distinct peak
367.265	13.08	3.6533e+06	2.91014e+07	4537.37	1	0.261444						1	in blank

## Sheet: Acacia 500C Fresh vs Aged
Acacia combusted at 500 C, fresh vs aged samples
mzmed	rtmed	maxint	Fresh	Aged	# of peaks	Scaled Intensity Difference	MassHunter m/z	MassHunter rt	formula	DBE	mass diff.	# of peaks visible for m/z ratio	iden. suggested
141.017	0.943	1.29402e+06	7.22578e+06	1.23782e+07	1	-0.0743418	141.018	0.94	C6H6O4	4	12.54	1	found in blank; kojic acid or muconic acid
255.233	13.152	419002	282909	5.11615e+06	1	-0.0570676	255.233	11.846	C16H32O2	1	-0.43	1	found in aged blank @ rt = 13.174 and fresh euca @ rt = 11.846; palmitic acid
209.061	11.6585	483416	96634.1	3.20398e+06	1	-0.0365231	209.061	11.594	C6H14N2O4S	1	-7.41	1	unknown
209.095	11.56	483416	40427.6	2.98455e+06	1	-0.0345049	209.095	11.574	C15H14O	9	10.19	multiple	found in aged blank; flavan or syringyl acetone*
305.023	0.943	360673	954015	2.86183e+06	1	-0.0241691	305.024	0.905	C13H10N2O5S	10	0.12	1	found in both blanks; uncertain
450.359	multiple		492605	2.17808e+06	1	-0.0206693	450.359	12.238	C27H49NO4	4	-0.72	2	found in fresh blank @ rt = 12.844 and aged blank @ rt = 12.238
100.934	multiple		2.31254e+06	3.64005e+06	1	-0.0200333						wide peak	found in fresh blank @ rt = 9.377 and aged blank @ rt = 13.059; no formulas found
232.976	multiple		3.435e+06	4.35368e+06	4	-0.017442	232.976	0.835	C7H6O7S	5	4.27	1	found in both blanks; uncertain
277.181	12.521	193150	141863	1.20302e+06	1	-0.0126849	277.181	12.506	C17H26O3	5	0.13	1	found in fresh blank @ rt = 12.285 (panaxytriol or paradol); aged blank @ rt = 12.506
389.289	12.674	37328.4	110647	1.06122e+06	1	-0.011331	389.29	11.632	C25H42OS or C21H42O6			1	found in fresh blank @ rt = 11.707 and aged blank @ rt = 12.659
223.02	0.943	171437	619553	1.45616e+06	1	-0.010991	223.02	0.901	C5H8N2O8	3	1.47	1	found in both blanks; uncertain
242.176	11.367	114873	60708.8	697291	1	-0.00756206	242.176	11.334	C13H25NO3	2	1.78	2	found in both blanks; uncertain
130.944	multiple		569389	1.09701e+06	2	-0.00728007	131.012	12.936	C8H4O2	7	11.33	wide peak	found in fresh blank @ rt = 9.569 and aged blank @ rt = 12.936; not sure
100.934	multiple		857957	1.22177e+06	1	-0.00592748						wide peak	found in fresh blank @ rt = 9.377 and aged blank @ rt = 13.059; no formulas found
291.989	multiple		448754	852917	2	-0.00560121			too many options			2	found in both blanks; uncertain
337.236	13.152	31307.6	0	432943	1	-0.00506246	337.236	13.196	C15H34N2O6	0	-5.38	1	found in aged blank; uncertain
187.098	10.071	61933.6	100121	459782	1	-0.00440085
361.258	13.152	28312.7	0	364751	1	-0.00426508
153.019	multiple		16669.3	374809	2	-0.00422029
417.323	13.27	26668.4	25840.7	343863	1	-0.00376908
265.148	13.538	18399.2	2718.15	318268	1	-0.00369508
339.2	13.6638	14402	85295.2	372443	1	-0.00352402
195.811	1.229	138659	507151	720473	1	-0.00348358							in blank
100.934	14.238	29553	189354	452784	1	-0.00344964
167.035	multiple		474671	687772	1	-0.00341764
299.202	12.636	36156.7	5485.25	296642	1	-0.00341523
99.0091	6.60033	50453.3	93303.2	353772	1	-0.00322768
145.051	multiple		222145	449006	2	-0.003086
249.978	multiple		341055	525679	2	-0.00282404
129.02	multiple		60167.3	290445	1	-0.00281002
239.129	11.828	53440.8	120118	339985	1	-0.00280522
299.006	0.904	41100.4	23375.5	256107	1	-0.00276695
227.201	13.538	22315.4	0	226811	1	-0.00265214
117.02	2.912	44323.1	323635	493768	1	-0.00262063
391.288	13.5023	15702.2	65295.9	268908	1	-0.00250822
149.046	1.22608	55617.3	317358	476878	1	-0.00248428
100.934	multiple		976201	1.02569e+06	1	-0.00248274
230.986	10.613	15952	25664.1	229008	1	-0.00242778
317.251	13.152	15930.8	0	206029	1	-0.00240913
149.025	7.934	30994.6	82689.6	272784	1	-0.00238409
253.217	12.096	13564.9	17615.5	211681	1	-0.00230359
173.081	9.31175	32844.4	34098.8	223321	1	-0.00227911
388.292	12.56	7450.04	20760.8	210672	1	-0.00226116
293.176	11.867	33167	48022.1	228022	1	-0.00219843
385.307	12.483	24673.5	0	186275	1	-0.00217814
374.993	15.001	6712.08	0	178666	1	-0.00208917
154.015	8.555	26990.9	8884.72	181756	1	-0.00203874
692.123	13.113	9472.21	0	171769	1	-0.00200852
309.171	11.828	32971.7	43382.3	207448	1	-0.00200306
137.025	multiple		1.81722e+06	1.68412e+06	4	-0.00198804			C7H6O3	5	nc		Salicylic acid or Dihydroxybenzaldehyde (ID'd by T at rt 7.55)
164.036	9.137	24972.5	0	169991	1	-0.00198773
195.03	8.749	17095.3	73588.5	227674	1	-0.00194528
661.609	multiple		0	165078	1	-0.00193029
286.203	11.405	27672.8	10170.6	170833	1	-0.00189848
325.185	13.2042	24651.9	224321	342989	1	-0.00182513
185.042	1.029	19407.9	0	152146	1	-0.00177907
131.035	multiple		162478	286749	1	-0.00177003
116.972	1.06817	18828.5	43127.5	184792	1	-0.00174062
280.061	11.675	26464.8	0	146536	1	-0.00171347
157.05	6.557	15636.2	22502.4	162528	1	-0.00168122
271.228	13.152	20081.3	75874.6	206132	1	-0.00167111
61.9895	1.229	22845.6	148601	266634	1	-0.00167002
160.935	11.172	11269.2	102785	227247	1	-0.00165583
165.019	multiple		104158	226229	1	-0.00163054
627.018	0.904	20298.5	6547.44	143446	1	-0.00161355
100.934	12.0388	42521.2	178154	283728	1	-0.00158198
463.012	0.904	19011.1	10574.7	141718	1	-0.0015541
129.019	2.01783	26714.5	30420.2	156683	1	-0.00153574
253.217	12.521	7484.56	2468.62	128728	1	-0.00148118
217.002	0.866	37625.8	64215.3	179484	1	-0.00147311
103.004	1.229	21024.7	21296.2	142956	1	-0.00146413
197.045	8.43767	24458	70690.9	183535	1	-0.00145738
219.029	12.1212	24073.6	102173	209561	1	-0.00145498
131.034	5.607	18158.5	58445.9	172472	1	-0.00144733
367.264	14.242	4794.52	0	117692	1	-0.00137619
233.154	12.56	23875.4	85128.5	188281	1	-0.00137222
167.034	8.826	12675.5	117962	215518	1	-0.00137082
478.984	0.904	18315.4	37492.7	147606	1	-0.0013607
375.182	10.941	15509.4	39105.4	146862	1	-0.00133628
103.004	1.911	20417.5	37385.8	144603	1	-0.00132662
135.03	1.229	10000.3	0	110874	1	-0.00129647
159.067	8.323	17486.5	47005.3	149902	1	-0.00129487
360.262	13.19	9936.27	0	110728	1	-0.00129476
183.03	7.262	15940.8	0	108747	1	-0.00127159
591.571	12.713	6345.18	0	106740	1	-0.00124812
179.035	8.285	15961	19277.7	121491	1	-0.00123279
395.243	12.058	16930.1	0	100040	1	-0.00116979
201.958	14.242	4248.22	68754.8	156496	1	-0.00116007
171.066	7.467	11689.4	5250.22	103394	1	-0.00115784
179.056	1.22608	17948.6	102323	182273	1	-0.00113444
261.045	10.419	24006.7	60817.6	147274	1	-0.00112956
241.217	13.036	6726.22	0	94781	1	-0.00110829
175.025	1.229	7280.38	16819.3	108736	1	-0.00110759
201.028	14.962	6322.85	0	92843.7	1	-0.00108563
297.244	13.5	11246.9	4527.36	95684.4	1	-0.00107474
261.045	9.718	17451.1	49960.1	131809	1	-0.00105452
591.572	13.231	8269.52	0	90103.6	1	-0.00105359
381.008	0.904	13885.9	5377.05	92213	1	-0.00102587
177.041	1.229	7740.5	0	87693.6	1	-0.00102541
674.608	12.291	4595.78	0	87368.8	1	-0.00102162
493.499	13.231	8690.14	0	86921.5	1	-0.00101639
444.972	12.713	5179.17	0	86678.2	1	-0.00101354
426.313	12.252	6840.79	0	85875.9	1	-0.00100416
180.99	9.22217	8186.3	86052.5	156176	1	-0.000987801
232.975	multiple		271669	310776	2	-0.000987157
105.018	1.151	25585.6	56382.9	131209	1	-0.000984919
160.842	1.20658	32540.3	82900.7	151637	1	-0.00096544
201.113	10.652	20494.9	65796.2	136106	1	-0.000950474
255.197	12.194	19561	140222	197616	1	-0.000944611
394.975	12.02	8534.41	0	80633.2	1	-0.000942855
229.07	8.13	3978.01	0	79220.3	1	-0.000926335
359.185	12.483	12383.7	0	77988.1	1	-0.000911926
393.283	13.27	5463.45	0	77907.5	1	-0.000910983
391.288	multiple		121160	178536	2	-0.000907224
269.212	12.9205	17914.5	113262	169088	1	-0.000873686
323.187	12.598	19050.5	0	74242.7	1	-0.000868131
291.098	11.56	10949.9	7479.54	79805.2	1	-0.000860303
132.031	1.229	6957.09	0	73217.7	1	-0.000856145
201.038	0.943	10279	53630.3	115951	1	-0.000833327
128.036	1.955	5246.07	7175.61	77107.8	1	-0.000831723
165.04	1.19	7700.63	7752.29	76382.2	1	-0.00081762
187.862	1.267	6009.41	0	69900.1	1	-0.000817352
533.455	13.152	7160.1	0	69541.9	1	-0.000813164
186.113	8.944	11268.5	8832.24	75916.5	1	-0.000801652
313.079	12.407	8008.2	6800.91	73336.8	1	-0.000791279
157.124	12.329	23082.3	117951	165212	1	-0.000782687
208.931	multiple		30037.5	91896.2	2	-0.000781909
163.024	multiple		0	65621.4	2	-0.00076732
179.035	10.11	12392	37443.4	96522.7	1	-0.000763853
215.126	11.061	11691.6	17408.5	79242.7	1	-0.00075699
493.498	12.368	3860.96	0	64680.7	1	-0.00075632
223.022	12.636	3832.49	42515.7	100021	1	-0.00075534
344.98	11.367	7413.78	0	63711	1	-0.000744981
491.481	13.19	1698.79	0	62837	1	-0.000734762
239.06	11.598	14376	47808.2	102163	1	-0.000728831
465.466	12.483	3120.14	0	61118.6	1	-0.000714668
110.976	multiple		146712	182951	1	-0.000709897
171.139	12.579	12145.1	23957.9	80163.8	1	-0.000703953
309.207	11.9288	18005.3	74545.2	121013	1	-0.000688756
187.061	7.506	8196.9	11917.6	68449.8	1	-0.000684284
175.021	14.6397	9532.14	60291	108131	1	-0.000676996
463.328	13.113	4185.32	0	56686.5	1	-0.000662843
229.885	1.19	6412.25	0	55913.9	1	-0.00065381
605.585	13.19	5707.85	0	54260.8	1	-0.00063448
269.137	9.796	6581.77	5797.5	57777.5	1	-0.000619117
398.265	8.633	7667.06	0	52666	1	-0.000615831
199.171	multiple		209108	226087	3	-0.000606393
181.015	7.262	6103.32	0	51813.7	1	-0.000605865
193.087	11.367	12967.3	22947.3	70645.2	1	-0.000602496
145.016	1.229	5345.72	5770.42	56268	1	-0.000601731
250.145	13.152	7389.1	2871.08	53683.8	1	-0.00059976
405.226	12.636	5778.88	0	51273.6	1	-0.000599549
280.984	11.367	6315.57	0	51196.7	1	-0.000598651
613.541	13.231	4925.44	0	50979	1	-0.000596105
217.034	14.724	17817.3	40903.3	84586.2	1	-0.00059057
403.304	12.56	9121.52	0	50078.2	1	-0.000585572
160.936	14.6	7343.28	29295.2	74299	1	-0.000583375
185.041	14.724	4448.86	0	49708.2	1	-0.000581246
647.593	12.998	5991.26	0	49420.3	1	-0.000577879
226.182	11.444	7419.55	0	49192.1	1	-0.00057521
212.02	9.367	7294.73	0	47732.2	1	-0.000558139
465.465	12.91	4246.39	0	47682.6	1	-0.000557559
383.205	12.483	8549.31	2762.23	49830.2	1	-0.000555761
223.024	11.675	6417.37	49456.7	87652.8	1	-0.000543095
330.98	12.058	4143.71	0	46000.9	1	-0.000537895
201.957	12.828	2991.1	0	45958.1	1	-0.000537395
380.977	12.713	2901.42	0	45602.5	1	-0.000533237
143.108	11.867	8830.38	19156.1	61549.7	1	-0.000533078
193.034	1.151	4309.54	7891.75	51771.7	1	-0.000528487
233.967	1.344	4933.28	2487.9	47070.7	1	-0.000526166
239.973	4.25	1178.14	0	44622.9	1	-0.000521782
446.312	12.407	6029.36	0	44617.7	1	-0.000521721
145.015	1.911	4583.87	6744.2	49871.8	1	-0.000517452
273.077	11.405	8055.06	15290	56429.3	1	-0.00051087
187.061	7.067	6449.82	20737.6	60880	1	-0.000509839
159.03	1.95033	5457.84	24959.9	64316.3	1	-0.000508883
599.358	13.423	5727.71	0	42886.4	1	-0.000501477
315.162	10.941	5641.94	2343.77	44725.8	1	-0.000500151
309.202	13.577	4739.87	0	42149.5	1	-0.00049286
285.207	13.036	7841.71	33873.8	70185.8	1	-0.00049067
519.326	12.674	5156.7	0	41810.4	1	-0.000488895
374.222	8.633	4837.88	0	39862.1	1	-0.000466113
595.058	0.943	3861.44	0	39808.6	1	-0.000465488
464.337	11.56	3964.24	0	39569.6	1	-0.000462693
196.026	9.214	4862.16	0	38469.2	1	-0.000449826
269.246	13.385	7640.04	19479.7	54373.2	1	-0.000446008
353.214	13.152	3823.69	0	38011.5	1	-0.000444474
180.989	9.81283	4649.18	23960.6	57468.9	1	-0.000438551
316.253	13.19	3081.12	0	36892	1	-0.000431384
494.385	12.058	3145.07	0	36412	1	-0.000425771
478.39	12.521	2303.66	0	36232.4	1	-0.00042367
168.835	14.399	1574.93	0	35836.2	1	-0.000419038
213.964	8.555	4064.02	0	34700.8	1	-0.000405762
157.087	9.387	8432.67	69075	91417.7	1	-0.000395983
144.03	1.267	2915.99	0	33722.4	1	-0.000394321
88.0045	1.344	2810.88	0	33125.4	1	-0.00038734
170.834	15.001	5282.25	0	32590.7	1	-0.000381088
405.19	10.496	3794.51	0	32405.3	1	-0.00037892
801.674	13.19	4098.96	0	32336.8	1	-0.000378119
157.014	1.229	4885.69	2671.37	34362.5	1	-0.00037578
745.668	13.19	5957.74	0	31602.7	1	-0.000369535
157.087	8.92483	3994.06	32987.6	58998.2	1	-0.000368485
431.261	13.152	3496.44	0	31462.4	1	-0.000367894
229.144	11.637	7226.49	16729.9	45142	1	-0.000364857
467.309	12.445	4197.77	0	31060.6	1	-0.000363197
195.139	11.828	6124.79	13236.6	41927	1	-0.000361298
214.88	1.305	2459.32	0	30883.7	1	-0.000361127
201.956	multiple		5066.24	35087.2	2	-0.00036092
283.191	11.7816	6125.21	28877.8	54484.3	1	-0.000355745
677.062	0.943	2879.98	0	30355.4	1	-0.00035495
313.189	13.19	2907.34	0	30266.9	1	-0.000353915
611.364	12.91	3056.15	0	30170.4	1	-0.000352786
162.02	8.208	3536.11	5315.08	34042.6	1	-0.000346282
221.118	11.29	5880.38	8300.04	36355.2	1	-0.000344242
127.04	6.675	6609.25	43359.6	65123.6	1	-0.00033906
155.002	1.067	7933.7	35189.5	58125.8	1	-0.000336832
195.05	1.229	2877.77	2466.35	30507.2	1	-0.000332696
185.154	13.19	4757.58	2613.1	30323.8	1	-0.000329122
257.212	12.789	3310.16	5875.5	32590	1	-0.000323836
444.984	0.943	3503.88	5231.03	32047.3	1	-0.00032377
161.045	2.43833	3334.97	37644.9	58570.5	1	-0.000318111
223.134	11.598	7631.58	21324.4	44879.2	1	-0.000317021
132.923	14.049	2561.04	2562.22	28829.8	1	-0.000312149
391.173	11.867	2971.96	7942.81	33164.2	1	-0.000310409
397.255	13.152	3349.92	0	26510.5	1	-0.000309991
166.051	10.903	3385.43	2928.29	28681.8	1	-0.000306851
175.097	7.741	3575.96	2331.47	27963.5	1	-0.000304266
161.08	6.557	3523.14	0	25843.6	1	-0.000302193
213.185	12.329	3628.24	0	25372.9	1	-0.000296689
227.165	12.058	4009.54	19414	40969.1	1	-0.000289913
282.982	12.174	1937.53	0	24565	1	-0.000287242
280.977	0.983	2620.12	11596.5	33847.2	1	-0.000282798
229.072	8.555	4003.2	13778.3	35393.2	1	-0.00027962
599.524	13.231	3143.63	0	23778.6	1	-0.000278046
267.196	12.751	8857.67	55900.4	69462.7	1	-0.000267617
283.037	0.943	3428.65	2970.91	25298.5	1	-0.000266875
314.979	0.904	6960.25	26916.9	44915	1	-0.000262955
605.585	12.636	2646.76	0	22084.2	1	-0.000258234
172.098	7.973	4068.65	0	21995.3	1	-0.000257195
445.28	13.19	3598.68	0	21955.3	1	-0.000256726
615.455	13.19	2264.54	0	21817.7	1	-0.000255117
153.032	11.598	2497.27	0	21608.9	1	-0.000252675
263.85	1.229	3051.01	2450.6	23582.7	1	-0.000251881
227.201	14.684	1139.2	0	21540.6	1	-0.000251877
257.176	12.329	4701.94	11000.1	30254.8	1	-0.000246603
156.006	7.506	3364.13	0	20897.9	1	-0.000244363
295.228	13.326	6925.37	40821.5	54844.7	1	-0.000243596
445.255	12.636	1905.59	0	20444.9	1	-0.000239066
173.118	11.172	4520.22	16844.3	34316.3	1	-0.000237157
229.07	9.021	4054.15	2664.33	22467.4	1	-0.000236757
173.118	10.225	6177.17	32688.6	47436.8	1	-0.00023621
528.979	0.943	2938.22	0	19854.8	1	-0.000232165
145.087	10.11	4930.42	10637.6	28323	1	-0.000227546
159.102	multiple		81303.5	87131	2	-0.00022672
182.011	9.329	2356.51	10115.2	27283.8	1	-0.000220484
102.02	1.229	3312.27	7578.39	25155.6	1	-0.000220314
77.0409	9.641	2398.08	2593.03	20758.4	1	-0.000217467
215.165	11.751	4018.31	7290.69	24597.3	1	-0.000216589
444.294	13.3655	2323.58	0	18263.2	1	-0.000213554
272.186	10.979	2098.51	0	18253	1	-0.000213435
168.835	14.921	2194.52	0	18010.2	1	-0.000210595
533.221	11.056	3208.11	0	17872.5	1	-0.000208986
359.244	12.135	2997.77	0	17740.1	1	-0.000207438
384.311	13.653	2563.51	0	17533.9	1	-0.000205027
426.319	12.952	2157.13	0	17390.5	1	-0.00020335
141.868	1.229	1806.67	0	17311.8	1	-0.000202429
404.229	12.636	1943.08	0	17191.5	1	-0.000201022
213.017	1.19	2848.72	2841.82	19517.3	1	-0.000200531
362.985	0.904	3669.02	3584.83	19803.6	1	-0.000196641
99.9261	14.282	1539.17	0	16717	1	-0.000195474
605.339	9.214	2674.65	0	16551.8	1	-0.000193542
395.385	12.058	1477.39	0	16115.6	1	-0.000188443
199.133	10.979	4355.32	33405.3	43846.3	1	-0.000187244
278.038	14.203	1755.91	0	15913.4	1	-0.000186077
173.01	2.003	2645.92	2498.01	17736.8	1	-0.000183061
313.107	10.738	3647.98	17700.6	30403.5	1	-0.00018306
185.061	10.7658	5468.39	40490.3	49322.7	1	-0.000182252
132.925	14.684	1677.29	5700.69	19859.7	1	-0.000176682
490.962	12.02	1540.5	0	14752.2	1	-0.0001725
204.034	14.764	1028.37	0	14588.3	1	-0.000170583
171.103	10.1428	17839.5	166130	152961	1	-0.000170046
333.076	12.02	5006.75	18568.1	29915.8	1	-0.000168907
563.536	13.19	3728.85	0	14431.5	1	-0.00016875
94.981	1.229	1666.71	0	14426.7	1	-0.000168694
429.197	13.19	2473.51	0	14104	1	-0.00016492
143.035	4.2585	6485.17	18464.1	28978.5	1	-0.00015896
110.026	7.027	1932.14	0	12513.5	1	-0.000146323
109.041	5.28	1642.06	3436.37	15346	1	-0.000145963
100.005	1.229	1628.3	0	12073.6	1	-0.000141179
188.022	1.229	1506.73	0	12014.5	1	-0.000140487
207.006	1.19	4504.97	13045	22836.7	1	-0.00013994
237.062	1.19	1924.31	3907.99	15183.8	1	-0.000139472
281.088	1.229	1292.04	2618.94	13675.9	1	-0.000134399
561.307	12.91	2405.43	5077.07	15645.6	1	-0.000133482
99.9266	14.638	1218.77	0	11373.3	1	-0.000132989
111.01	7.741	5164.97	41338.1	45577.8	1	-0.000130203
304.996	6.598	996.902	0	10981.5	1	-0.000128408
158.081	6.832	1447.84	0	10835.1	1	-0.000126697
241.181	12.252	3930.46	32882.3	38126.4	1	-0.000125455
389.286	11.637	6474.48	22041.5	28613.3	1	-0.000119836
115.04	5.641	19706.2	200003	176793	1	-0.000118697
200.07	9.484	1110.04	0	9799.2	1	-0.000114583
115.077	10.574	2682.51	12035.6	19714.9	1	-0.00011327
72.0093	1.229	940.402	0	8724.31	1	-0.000102015
204.036	14.32	1578.8	3401.56	11526.4	1	-0.00010164
532.981	14.962	1077.59	0	8628.37	1	-0.000100893
414.202	11.828	1342.85	0	8032.85	1	-9.39292e-05
219.849	1.19	1387.2	0	7773.78	1	-9.08999e-05
492.127	9.718	742.307	0	7374.18	1	-8.62273e-05
100.933	multiple		53729.5	52082.5	1	-8.55389e-05
268.166	10.785	912.173	0	6970.06	1	-8.15019e-05
125.043	0.983	3828.44	27339.9	29311.2	1	-7.63765e-05
348.011	5.53	822.816	0	6418.4	1	-7.50513e-05
163.003	8.09	3712.56	20600.7	23293.1	1	-7.16631e-05
289.217	13.577	940.326	0	5786.59	1	-6.76634e-05
181.014	7.86833	5708.7	87542	78466	1	-6.46196e-05
168.031	10.032	4973.42	40696	38794.6	1	-5.71419e-05
237.935	1.229	1382.58	6663.17	10167.8	1	-5.39762e-05
344.995	1.229	556.472	0	4469.75	1	-5.22654e-05
207.05	1.22608	9072.74	46978.4	43601.3	1	-5.21402e-05
129.092	11.29	3617.97	23628.4	24060.2	1	-5.1135e-05
241.217	12.2303	3930.46	38810	36524.9	1	-4.89767e-05
311.944	1.305	541.149	0	4133.15	1	-4.83295e-05
301.145	10.979	6681.48	36384.9	34196.1	1	-4.53728e-05
190.02	14.623	3347.06	30513.7	29132.3	1	-4.33622e-05
165.092	11.2847	7962.63	93368.5	81453.4	1	-4.27857e-05
177.901	1.229	1083.88	2608	5005.54	1	-3.31215e-05
75.0096	1.22608	24543.9	172407	146461	1	-3.28776e-05
221.852	1.19	6612.24	31443	28920.6	1	-3.18335e-05
201.802	1.246	5931.17	38567.6	34614.8	1	-2.90032e-05
146.061	10.4728	3566.45	27454.4	25237.5	1	-2.76265e-05
694.957	13.2432	1532.89	41643.9	35565.9	1	-1.01533e-05
201.149	11.7732	1872.94	19960.7	17312.3	1	-7.96405e-06
118.031	8.711	14207.4	59232.7	48781.3	1	6.67948e-06
269.084	10.9328	3063.09	26801.7	20822.8	1	1.76373e-05
594.963	12.3473	2527.62	42492.8	33218.9	1	2.55605e-05
199.098	9.18533	6240.28	46471.5	35886.9	1	3.31268e-05
243.159	11.8198	6280.14	50539.7	37914.1	1	4.90577e-05
205.071	6.0615	4013.31	39140.1	28093.3	1	5.28312e-05
478.388	13.0381	4399.84	46635	34231.5	1	5.40773e-05
87.0453	2.391	3484.69	46990.8	32353.9	1	7.94984e-05
694.956	12.6377	2110.72	24651.9	11158.7	1	0.000109696
307.191	12.0388	3925.37	38005	21825.2	1	0.000115066
519.323	12.212	5055.85	24741.9	9859.1	1	0.000125769
247.094	10.6375	3535.51	30531	13970.3	1	0.000134098
281.172	13.886	3710.53	41684.8	22528.3	1	0.000142696
187.041	9.81283	4116.76	46503.5	23810	1	0.000174656
305.174	11.6958	2586.31	54721.8	29632.9	1	0.000186636
191.153	9.51817	1988.25	23023.7	2612.53	1	0.000193764
123.009	3.9375	1833.89	24700.1	3790.51	1	0.000196323
417.076	9.259	2280.01	65975.9	37813.7	1	0.000200622
217.085	10.1065	5106.59	40392.1	15185	1	0.000215968
381.244	14.238	2767.42	36036.9	11328	1	0.000218637
179.035	9.06625	28657.6	272360	207302	1	0.000229509
136.017	9.1485	2779.05	32150.1	6592.55	1	0.000236141
217.085	11.2847	4872.96	40408.6	13351.2	1	0.000237571
245.14	12.549	8218.44	46477.8	17365.7	1	0.000249759
615.995	12.7483	2113.7	25643.8	0	1	0.00024984
307.191	11.6585	5146.61	49464.5	19739.9	1	0.000251095
71.0147	2.64117	9148	102005	59880.4	1	0.000293609
203.109	11.4668	3805.87	50538.8	15080	1	0.000316051
215.023	1.18333	9019.68	62386.4	24507.7	1	0.00032124
478.391	13.5453	3409.01	33267.7	0	1	0.000324117
234.99	11.8543	9152.56	134742	81691.1	1	0.000357525
125.025	5.79033	6050.73	57346.5	15961.7	1	0.000372068
72.9945	1.229	5620.73	68931.8	24870.9	1	0.000380762
175.04	10.4728	12841	125932	71879.6	1	0.000386415
163.061	1.229	22910.5	183806	118763	1	0.000402057
234.99	12.9367	9147.5	114663	60719.2	1	0.000407127
153.092	9.83092	5012.86	62259.9	13976.1	1	0.000443154
162.839	1.265	9185.87	99026.3	43021.3	1	0.000461729
235.082	1.22317	7595.07	80894.7	27263.6	1	0.000469335
223.08	multiple		81061	26932.4	2	0.000474828
259.118	9.81283	9819.4	72924.7	17250.2	1	0.000508773
244.985	9.22217	6308.4	72251.5	13432.4	1	0.000546857
127.001	0.943	6672.29	59439.7	2228.51	1	0.000553045
224.919	9.95967	6368.96	60235.4	0	1	0.000586855
637.343	11.9288	9306.34	66086	3855.24	1	0.000598776
279.908	1.30283	9237.37	66331.4	3871.74	1	0.000600974
187.04	10.5092	8307.32	85820.9	19065	1	0.000613198
149.025	8.43783	19665.4	143094	61910.5	1	0.000670196
160.936	1.90917	8557.66	74392.3	4662.96	1	0.000670257
203.027	9.92333	4062.31	243669	144393	1	0.000685587
193.051	multiple		154287	69195.3	2	0.000694059
161.046	multiple		236070	136904	2	0.00069912
197.808	1.344	25250.8	144639	60707.3	1	0.000699311
127.04	7.25533	16891.1	132410	47852.1	1	0.000730493
234.989	multiple		670813	495976	3	0.000736015
234.989	multiple		278993	168637	2	0.000746248
551.306	11.7732	9543.34	89190.1	4942.11	1	0.000811163
123.009	6.87267	8705.29	102897	14960.2	1	0.000827564
329.233	11.543	7641.15	140579	45464.3	1	0.000837996
311.224	12.3915	13532.5	138583	43535.4	1	0.000841109
213.15	11.2475	15581.7	117971	21303.8	1	0.000900244
159.045	10.2165	9625.97	108563	11481.6	1	0.000923442
197.021	1.19	25644.3	139717	34553.6	1	0.000957182
431.265	12.428	17470	107350	7435.44	1	0.000958938
505.374	12.2303	8918.64	134959	26944.7	1	0.0009998
178.997	9.757	5792.32	122563	15765.7	1	0.00100975
116.929	1.90917	18968.7	277111	142404	1	0.00103466
417.074	10.619	7426.11	141711	24408.7	1	0.00109523
294.983	multiple		165109	39789.1	2	0.00114334
163.04	8.68733	27640.3	271970	128465	1	0.00114756
311.169	12.843	36720.7	294083	146479	1	0.00115236
132.045	9.99617	8223.94	151131	27272.7	1	0.00115352
149.025	8.96283	19399.2	165531	36356	1	0.0011876
293.212	13.1274	15585.8	145320	15587.3	1	0.00123355
417.322	12.1575	10631.9	156404	23542.9	1	0.00124851
391.095	12.1212	10393.3	138172	7027.48	1	0.00126399
168.03	9.54175	18571.7	206630	60067.3	1	0.00131076
161.008	1.267	17024.8	177485	34328.9	1	0.00132777
111.009	6.02233	21124.4	181713	19957.8	1	0.00153701
417.073	9.95967	11086.9	204888	36103.8	1	0.00157399
227.202	12.9803	24981.7	183210	16724.3	1	0.0015894
505.375	13.2042	16547.4	209309	36208.3	1	0.00161584
129.056	multiple		485510	261202	2	0.0016759
245.139	multiple		236507	49809.5	1	0.00172178
253.093	1.151	50630.5	262303	58438.1	1	0.00187221
230.986	10.1802	28383	207649	7801.18	1	0.00193184
191.019	1.95033	18762.8	215073	5008.07	1	0.00203683
149.061	8.43783	39482.6	245862	29931.2	1	0.00204537
136.017	8.701	34383	229346	6334.36	1	0.00216038
535.313	12.6742	29754.3	231828	8024.09	1	0.0021648
303.99	5.568	20815.8	232484	6228.48	1	0.00219219
115.004	2.68233	39180	423628	160155	1	0.00225456
417.191	11.543	48924	258797	16332.5	1	0.0023304
427.219	12.194	41990	244807	2868.65	1	0.00235154
139.077	8.77533	22903.3	278645	27598.8	1	0.00239204
417.074	11.543	14827.7	310888	45218.4	1	0.00250014
207.066	9.37033	45715.5	323031	48204.8	1	0.00258352
209.083	10.2893	41731.7	302003	28959.9	1	0.00260369
163.04	multiple		528760	216637	1	0.00261838
175.076	10.363	29665.1	305280	28065.5	1	0.00264608
505.374	12.7483	14062.5	387180	85241.2	1	0.00277544
139.04	multiple		376151	72207.4	1	0.0028204
152.035	12.9803	19429.7	303524	0	1	0.00295714
181.072	12.6742	32513.7	339072	18020.2	1	0.00309276
303.953	4.73333	17972.2	364896	4663.26	1	0.00350054
89.0249	1.78683	27921.5	482607	88854	1	0.00366291
165.02	7.90583	53930.6	437409	41013.9	1	0.00378196
191.021	8.85067	20262.4	498645	83525	1	0.00388148
111.045	6.46	67273.7	513537	91286.1	1	0.00393581
203.07	11.0263	8003.51	531483	101978	1	0.00398564
435.202	10.8703	94346.6	552444	109455	1	0.00410242
367.229	14.0705	42290.7	437858	0	1	0.00426592
147.045	multiple		717578	230419	2	0.00429682
152.037	9.18533	35784.3	467212	2022.82	1	0.00452825
94.0303	multiple		467682	2383.11	2	0.00452862
175.04	multiple		618630	109185	1	0.00475041
736.137	12.9803	52627	535134	0	1	0.00521365	736.137	12.957	C44H23N3O9	35	-0.53	1	fresh acacia only; uncertain
125.061	7.79217	78309.1	597052	36898.5	1	0.00538543	125.061	7.579	C7H10O2	3	-3.35	1	cyclohexene carboxylic or heptadienoic acid
161.061	9.70217	57996.4	632713	57485.6	1	0.00549214	161.061	9.502, 9.923	C10H10O2	6	-0.94	2	methoxycannamaldehyde, methylcinnamic acid, methylhydrocoumarin
203.129	10.363	87014.9	585620	14445.7	1	0.0055366	203.129	10.218	C10H20O4 (Damon); C11H8O4 (Marc)	1	0.14	1	found in fresh blank; 3,10-dihydroxydecanoic acid or dihydroxynephthelene-carboxylic acid
149.061	10.253	61798.1	600711	24072.8	1	0.00557105	149.061	8.233, 9.540, 9.617, 9,961, 10.114	C9H10O2	5	-0.03	4-5	acetylanisole,* hydrocinnamic acid,* Tolyacetic acid
221.067	1.22608	75436.3	725175	112193	1	0.00575326	221.066	1.168	C8H14O7	2	0.61	1 or 2	dihydroxydimethoxyoxane-2-carboxilic acid*t
595.334	12.194	114994	631369	3914.26	1	0.00610546	595.333	12.132	C28H52O13	3	0.13	1-3	found in fresh blank; too many possibilities
137.061	10.0327	87622.8	667552	8137.99	1	0.0064086	137.061	9.684, 9.884	C8H10O2	4	-4.02	2	anisyl alcohol; creosol; dimethoxybenzene; tyrosol
535.313	12.194	145509	773240	2996.87	1	0.0074984	535.312	12.12	C26H48O11	3	0.21	3	found in fresh blank; unknown
181.051	8.85067	108426	864021	67581.2	1	0.00762765	181.05	8.125, 8.268, 8.664	C9H10O4	5	0.3	3	Homovanillic acid*, dimethoxybenzoic acid,* or syringaldehyde*
435.084	12.0388	42490.6	826101	33506.2	1	0.00765666	435.084	12.483	C22H16N2O8	16	-2	wide peak	found in blank; unknown
303.952	multiple		830335	11958.1	2	0.00794988	303.952	1.211	C7H3N3O9S	8	-1.82	4	found in blank; unknown
152.01	8.208	31349	851473	12865.6	1	0.0081452							no peaks present
96.9607	1.95033	147199	977337	85897.2	1	0.00851749	96.992	1.857	C8H4O6	7	9	1	dihydroxyphthalate*
195.066	multiple		1.03744e+06	94122.4	2	0.00900691	195.066	8.935, 9.540	C10H12O4	5	-0.15	2	Acetosyringone* or Homoveratic acid*
181.072	12.0423	85303	1.03998e+06	11500.9	1	0.00999776	181.072	9.569	C6H14O6	0	-1.27	4	found in blank; mannitol or sorbitol
177.055	9.37033	153056	1.09522e+06	24938.1	1	0.0103788	177.055	9.186	C10H10O3	6	1.16	1	coniferaldehyde†
417.074	multiple		1.64088e+06	271050	3	0.0128172	417.073	12.599	C22H14N2O7	17	-1.75	wide peak	found in both blanks
666.06	13.2898	133243	1.34447e+06	3496.77	1	0.0130579			too many options			1	too many options
435.084	multiple		1.56144e+06	57131.4	2	0.0145446	435.084	12.483	C22H16N2O8	16	-2	wide peak	found in blank; unknown
477.213	11.3621	311207	1.64682e+06	91483.7	1	0.0149747	477.213	11.381	C25H34O9	9	1.11	1	found in aged blank, too many possibilities
135.045	multiple		2.54649e+06	189480	3	0.0225941	135.045	8.782, 9.317	C8H8O2	5	-2.25	2	anisaldehyde,* acetophenone, methylsalicylaldehyde,* or methylbenzoic acid*
123.045	8.96283	341167	2.41453e+06	22080.7	1	0.0232658	123.045	8.469, 8.737	C7H8O2	4	-0.81	2	guaiacol
151.04	multiple		4.1279e+06	860252	1	0.0301579	151.04	7.836, 8.323, 8.469, 8.909, 9.579	C8H8O3	5	-0.95	5	vanillin,† methoxybenzoic acid,* hydroxyanisaldehyde*
118.969	1.067	152165	3.17382e+06	32403.4	1	0.0305427	119.037	0.943	C5H4N4	6	-2.57	1 to 3	found in both blanks; purine
191.019	multiple		3.47748e+06	132767	10	0.0323276	191.021	8.629	C7H4N4O3 or C6H8O7	8 or 3	-1.54 or -8.07	4 or 5	unknown; citric acid; no distinct peaks in any sample
367.265	13.1158	515757	3.70869e+06	5078.14	1	0.0360732						1	in blank
152.036	multiple		4.03119e+06	90840	7	0.0382124	152.035	10.299	C7H7NO3	5	4.2	1	nitroanisole*, nitrocresol, or nitrobenzyl alcohol*
109.03	6.87133	1.03708e+06	7.22206e+06	128526	1	0.0688594	109.03	6.634	C6H6O2	4	-3.37	1	dihydroxybenzene
											nc=not calculated

## Sheet: Acacia 800C Fresh vs Aged
Acacia combusted at 800 C, fresh vs aged samples
mzmed	rtmed	maxint	Fresh	Aged	# of peaks	Scaled Intensity Difference	MassHunter m/z	MassHunter rt	formula	DBE	mass diff.	# of peaks visible for m/z ratio	Iden. Suggested
255.233	12.826	528978	364449	6.30445e+06	1	-0.108217	255.233	11.846	C16H32O2	1	-0.43	1	found in aged blank @ rt = 13.174 and fresh euca @ rt = 11.846; palmitic acid
118.969	0.939	194621	12904.2	2.45726e+06	1	-0.0451209	119.037	0.943	C5H4N4	6	-2.57	1 to 3	found in both blanks; purine
450.359	11.8072	124814	12422.1	1.39876e+06	1	-0.0255688	450.359	12.238	C27H49NO4	4	-0.72	2	found in fresh blank @ rt = 12.844 and aged blank @ rt = 12.238
291.989	multiple		2.01041e+06	3.7229e+06	7	-0.023013			too many options			2	found in both blanks; uncertain
277.181	12.1078	178015	59178.4	1.1245e+06	1	-0.0194349	277.181	12.506	C17H26O3	5	0.13	1	found in fresh blank @ rt = 12.285 (panaxytriol or paradol); aged blank @ rt = 12.506
232.976	multiple		2.67201e+06	4.17566e+06	7	-0.0163108	232.976	0.835	C7H6O7S	5	4.27	1	found in both blanks; uncertain
100.934	multiple		1.77101e+06	2.99407e+06	7	-0.0149958						wide peak	found in fresh blank @ rt = 9.377 and aged blank @ rt = 13.059; no formulas found
103.024	14.7695	50622.3	49352.1	830909	1	-0.0142326			C4H8O3	1	-4.1		hydroxybutanoic acid, methoxypropanoic acid
471.268	13.5347	20908.2	3651.71	737180	1	-0.0135413			too many options			1	found in aged blank; uncertain
337.235	12.8697	38994.1	11700.2	653006	1	-0.0118023	337.236	13.196	C15H34N2O6	0	-5.38	1	found in aged blank; uncertain
311.295	13.2682	15147.8	14934.2	633500	1	-0.0113681	311.295	13.498	C20H40O2	1	3.91	2	found in aged blank; arachidic acid?
253.217	multiple		19335.2	636962	2	-0.0113319	253.217	12.506	C16H30O2	2	0.8	2	found in aged blank; palmitoleic acid?
591.571	12.9143	9098.42	0	572943	1	-0.0105891	591.573	13.251	C39H76O3	2	-0.55	wide peak	found in aged blank; dioleylglycerol or oleic acid?
389.29	12.2822	44899	71412	634956	1	-0.0101086	389.29	11.632	C25H42OS or C21H42O6?			1	found in fresh blank @ rt = 11.707 and aged blank @ rt = 12.659
301.218	11.8925	41453.9	8288.11	543413	1	-0.00985452	301.218	12.353	C20H30O2	6	-3.4	3	found in aged blank; abietic acid, isopimaric acid, levopimaric acid, or pimaric acid?
493.498	12.958	8152.55	0	526381	1	-0.00972852	493.499	13.213	C33H66O2	1	-0.39	wide peak	found in aged blank; psyllic acid?
367.265	14.077	42441	2236.82	457186	1	-0.00839871						1	in blank
130.944	multiple		1.25228e+06	1.9967e+06	9	-0.00837834	131.012	12.936	C8H4O2	7	11.33	wide peak	found in fresh blank @ rt = 9.569 and aged blank @ rt = 12.936; not sure
361.258	12.826	30911.2	11824.4	395865	1	-0.007047	361.258	13.174	C19H38O6	1	5.99	1	found in aged blank; uncertain
417.321	12.958	30282.2	55126.4	443705	1	-0.00694484	417.322	12.016	C24H42N4O2	6	0.64	1	found in fresh blank @ rt = 12.016 (C24H42N4O2) and aged blank @ rt = 13.251 (C23H46O6)
147.047	multiple		92913.1	441365	2	-0.00604088	147.047		C9H8O2	6	-8.72	wide peak	cinnamic acid
241.108	7.204	12989	53106	369822	1	-0.00562537	241.108	7.859	C12H18O5	4	-0.49	1	found in aged blank; not sure
239.129	11.3242	51011.4	3535.95	288990	1	-0.00526055	239.129	11.808	C13H20O4	4	-2.15	1	found in both blanks; uncertain
249.978	multiple		324788	677492	3	-0.00512329	249.978		C5H5N3O7S			wide peak	found in both blanks; uncertain
262.039	multiple		207727	515305	2	-0.0047922
299.202	12.1819	38130	45032.6	304196	1	-0.00459637
317.251	12.826	19470.7	2915.45	244337	1	-0.0044494
309.171	11.3242	36002.1	2319.21	227544	1	-0.00415262
339.2	13.541	12636.7	56636.7	285085	1	-0.00397883
241.217	12.684	20929.1	8501.15	215366	1	-0.00378673
411.323	12.2378	26880	3060.29	201201	1	-0.00364887
217.035	multiple		408425	697963	2	-0.00359654
385.307	12.0648	25506.4	16448.4	209682	1	-0.00350066
471.268	multiple		15013	197657	2	-0.00331111
265.147	multiple		85346.1	280696	2	-0.00324378
227.202	13.1046	29347.7	102882	289682	1	-0.00301043
360.262	12.826	11862.8	7536.79	155944	1	-0.00271046
208.931	0.939	13013.9	37461.7	191809	1	-0.00269169
375.181	10.32	15750.1	5486.72	145918	1	-0.00257187
307.042	13.97	6990.1	160501	327892	1	-0.00240418
275.993	5.15517	12544.6	1016.59	129279	1	-0.00236617
479.481	12.826	2348	2063.07	130503	1	-0.00236495
216.934	0.977	14373.2	38795.3	175541	1	-0.00236065
249.978	multiple		212843	390025	2	-0.00236024
232.976	7.132	21443.2	44755.2	179873	1	-0.00230495
279.233	13.2682	10510.1	7096.28	127289	1	-0.0021909
269.213	12.809	8829.2	55988.4	185213	1	-0.00214778
533.455	12.826	10577.9	0	110906	1	-0.00204975
99.9262	multiple		130248	270376	5	-0.00203026
262.039	10.96	21844.5	87933.2	208224	1	-0.00184542
426.314	11.8072	8117.28	0	95446.2	1	-0.00176403
359.183	12.1078	13719.7	11459.9	104252	1	-0.00166575
412.344	12.5882	10208.3	0	86497.9	1	-0.00159865
232.976	multiple		426807	608376	3	-0.00152212
446.312	12.0648	7892.69	1716.67	83731.8	1	-0.00150842
187.098	multiple		74502.9	172559	2	-0.00149219
233.155	12.2849	20538.9	60876	153553	1	-0.00145131
325.201	11.855	6013.32	24073.9	107023	1	-0.00142963
321.21	12.0648	4428.73	6058.03	84517.5	1	-0.00142405
232.975	6.086	25394.8	241077	373949	1	-0.00142003
332.042	10.2792	4111.08	50182.9	138301	1	-0.00141299
307.043	12.495	5706.92	61350.8	151593	1	-0.00140427
353.207	12.7813	5855.5	8080.09	84544.2	1	-0.00137849
365.263	13.6253	9653.21	4796.5	78356.6	1	-0.00133892
241.217	12.022	9587.55	16294.7	91807.8	1	-0.00132562
239.06	11.1075	8765.1	6814.22	80059.4	1	-0.00132444
173.082	8.62217	9121.19	7652.79	79943	1	-0.00130318
406.938	0.900833	13560.7	470.509	69827	1	-0.00127982
201.024	14.688	7996.19	10036.4	80743.6	1	-0.00126369
335.22	12.1078	8820.85	1436.82	70103.5	1	-0.00126292
150.001	9.348	9882.91	18807.1	90233.4	1	-0.0012393
218.031	10.1137	18746.2	80240	165841	1	-0.00123735
383.219	11.8925	6754.86	34241.6	106272	1	-0.00118415
363.238	11.8925	7510.27	1698.25	65618.3	1	-0.00117407
375.273	12.826	6197.47	6692.67	71070.6	1	-0.00116107
587.508	12.8697	3632.04	0	61144.9	1	-0.00113007
398.266	7.98483	9089.61	0	61103.4	1	-0.00112931
275.112	8.82083	11524.4	5412.81	67600.5	1	-0.00112609
269.212	12.4138	8486.49	21790.5	87018.3	1	-0.00111192
271.228	12.8835	11276.9	18562	81355	1	-0.00108079
808.569	12.457	5403.72	0	58040.9	1	-0.00107271
223.133	11.1075	6278.58	6660.56	65496.7	1	-0.00105879
471.267	11.9353	6801.53	8316.37	66591.3	1	-0.0010413
293.176	11.701	13879.9	66947.3	138440	1	-0.0010337
394.977	11.5488	7198.29	6399.94	63049.5	1	-0.0010195
242.176	10.8012	9213.77	0	54020.6	1	-0.000998403
613.54	12.8697	5909.91	675.501	54609.6	1	-0.000993904
471.267	10.9392	4257.34	0	52435.5	1	-0.000969109
692.564	11.8498	3705.77	0	51347.9	1	-0.000949008
273.077	10.8537	8198.12	6270.47	57715.5	1	-0.000923863
132.924	multiple		58612.8	122118	2	-0.000921882
674.609	11.8072	4674.36	0	49366.7	1	-0.000912391
267.197	12.3695	8457.58	7194.06	57647.4	1	-0.000901567
269.139	9.1825	7110.06	9152.42	59606.6	1	-0.000893169
365.265	multiple		1711.32	50108.9	2	-0.000887128
309.206	11.7585	9426.27	37564.8	93800.2	1	-0.000877951
201.113	10.073	8514.47	11272.8	61225.4	1	-0.00087479
309.204	13.2682	5256.52	555.941	44642.2	1	-0.00081241
405.228	12.2822	6461.18	7724.76	53301.8	1	-0.000809164
390.965	14.6367	4523.31	618.224	41708	1	-0.000756761
316.253	12.826	3491.44	989.506	41238.2	1	-0.000739622
323.187	12.2378	8381.78	13834.6	56051	1	-0.000720803
464.338	11.0227	3896.18	0	38763.3	1	-0.00071642
315.161	10.3622	5048.27	4269.43	43941.4	1	-0.000714871
170.833	14.454	5306.3	0	37576.7	1	-0.00069449
428.335	12.5437	4101.77	3908.93	42308.7	1	-0.000692908
655.421	13.9857	1582.18	0	37104.8	1	-0.000685767
313.079	11.978	5934.8	14068.7	52970	1	-0.000658529
176.022	13.67	3073.58	94276.5	150977	1	-0.000642906
189.032	multiple		60051.6	108539	2	-0.000638155
617.581	12.9143	2225.64	548.331	34842.4	1	-0.000631464
494.384	11.8072	3827.26	0	33805.2	1	-0.000624784
335.22	11.6358	4359.09	585.804	34490.6	1	-0.000624109
227.904	5.96467	5653.23	0	32043.6	1	-0.000592226
339.165	11.662	4246.6	16728.5	52239.4	1	-0.000584439
313.19	12.826	4122.85	3919.99	34901.3	1	-0.000555753
282.981	11.7208	2846.97	2655.26	32964.7	1	-0.000548769
875.75	13.0915	2428.6	0	29023.8	1	-0.000536415
323.219	12.7275	4973.07	2339.97	31871.2	1	-0.00053574
490.961	11.5488	1321.75	0	28837.7	1	-0.000532976
705.549	12.3695	4010.63	0	28700.1	1	-0.000530433
247.17	12.2378	5449.97	882.123	29602.2	1	-0.000527012
405.19	9.90767	3464.3	6149.7	35423.4	1	-0.000514614
297.244	multiple		52060.9	91986.9	2	-0.000514247
615.459	12.8697	2811.73	0	27589.4	1	-0.000509904
431.261	12.8697	2970.3	5738.03	34605	1	-0.000508866
363.127	8.82083	4184.63	3486.59	31595.9	1	-0.000504535
325.185	13.107	14496.6	137647	196432	1	-0.000495114
444.292	12.8697	3788.13	0	26415	1	-0.0004882
332.041	9.0945	2906.21	15241.5	45128.8	1	-0.000486895
587.504	12.1948	4173.11	0	26187.7	1	-0.000483998
817.711	12.457	4055.54	0	25273.2	1	-0.000467097
269.088	10.7759	8143.55	34057.7	66480.8	1	-0.000452923
301.218	12.762	5894.72	19200.7	48046.6	1	-0.000450636
381.261	12.826	2897.07	600.866	23764.3	1	-0.000425524
215.13	10.6298	4840.93	4099.31	27919.5	1	-0.000422632
359.261	12.826	1982.93	1784.23	22762.1	1	-0.000380046
332.041	11.2367	4565.12	11210.6	34143.3	1	-0.000375678
261.134	9.0945	4105.26	16078.2	39976.5	1	-0.000372612
362.239	11.8925	1589.53	770.254	20732.9	1	-0.000365638
345.171	9.90767	3352.4	8341.43	30029.1	1	-0.000364994
267.943	1.207	2719.59	28850.8	55170.8	1	-0.000362496
430.264	12.826	1891.99	583.676	20318.9	1	-0.000362238
135.044	9.90767	3154.29	8692.55	30285.9	1	-0.000361741
448.968	13.58	1469.89	3077.78	22851.1	1	-0.000352227
478.39	12.1948	3193.98	9898.42	30965.9	1	-0.000346843
385.256	13.2682	2872.61	2032.01	21231.3	1	-0.000346109
463.329	11.8925	2513.04	2215.91	20485.9	1	-0.000328144
146.014	13.7148	2048.39	16360.7	36901	1	-0.000309334
551.537	12.6327	1930.99	0	16460	1	-0.000304211
374.995	0.977	2649.22	2852.06	19381.8	1	-0.000293247
315.181	11.3242	4734.97	15463.1	34650.4	1	-0.000288188
231.045	5.2895	4107.34	41669	66392.5	1	-0.00027792
337.231	11.5923	2801.33	3003.82	18734.7	1	-0.000277832
466.96	0.939	3307.46	6317.63	22521.3	1	-0.000272333
419.21	10.716	2736.86	1991.65	16696.8	1	-0.000263222
237.114	10.6733	2377.51	3073.28	17796.1	1	-0.000258903
472.968	14.7868	1494.55	1475.36	15642.6	1	-0.000255499
330.979	11.5488	3955.76	20634.3	39145.2	1	-0.000253468
183.01	9.141	2144.94	0	13457.1	1	-0.000248713
98.9394	14.2693	1641.68	6333.2	21237.6	1	-0.000248253
77.0403	8.949	1381.76	1232.08	14926.7	1	-0.00024781
287.038	14.809	982.44	8417.81	23733.1	1	-0.000246892
271.079	7.54117	1637.6	839.748	14369.3	1	-0.000246445
429.193	12.8697	2407.71	1166.84	14269.8	1	-0.000237156
491.481	12.7275	1672.01	0	12724.9	1	-0.00023518
291.989	5.351	20544.2	157678	207023	1	-0.000234583			too many options			2	found in both blanks; uncertain
143.108	11.5348	5273.03	21623.2	38623.2	1	-0.000221296
314.979	0.977	7733.13	39046.5	60078.6	1	-0.000220961
185.875	14.454	2176.65	0	11924	1	-0.000220378
577.418	12.6327	1665.3	610.403	12529.2	1	-0.000217659
99.9259	13.3793	1878.39	4821.74	17620.6	1	-0.000215833
329.232	11.0227	1814.71	3959.06	16256.3	1	-0.000210268
285.181	6.842	991.15	0	10178.3	1	-0.000188115
98.9391	13.6253	2265	4766.7	15608.3	1	-0.000179895
183.005	9.63433	2149.35	1330.91	11085.1	1	-0.000174559
305.195	13.6695	1568.56	0	9336.26	1	-0.000172552
229.143	11.1075	2072.66	6983.44	17407	1	-0.000162645
362.128	8.82083	1904.64	5718.16	14406.6	1	-0.000136012
361.15	9.549	2199.8	4780.1	12172.8	1	-0.000116095
365.055	5.4585	925.336	0	6260.84	1	-0.000115712
442.286	12.2822	855.612	2349.59	9122.3	1	-0.000115078
146.014	14.2142	1610.85	7873.16	15774.7	1	-0.000112211
134.894	1.824	1690.02	13556.7	22300.6	1	-0.000103363
387.185	10.5385	1667.52	6004.43	11530.8	1	-7.6341e-05
246.902	14.5907	370.679	0	4095.42	1	-7.56911e-05
307.043	12.895	3868.46	21164.2	29935.8	1	-7.11903e-05
146.011	14.8342	1155.49	8460.95	13742.8	1	-6.127e-05
239.969	0.494	1668.69	6293.13	11061.6	1	-6.10943e-05
262.038	14.9827	25291.8	130245	163178	1	-4.91079e-05
189.03	14.5907	2578.59	64917.5	82036.4	1	-3.7492e-05
185.876	1.207	1041.86	13385.7	17412.8	1	-1.69214e-05
794.95	13.067	1798.58	11864.7	13493.7	1	2.08666e-05
161.001	0.977	1886.17	9650.83	10722.7	1	2.16506e-05
465.175	11.546	1455	14269.6	15805.4	1	3.292e-05
297.243	12.3695	7795.29	40992.8	48679.9	1	3.40404e-05
381.005	0.9	1802.89	9824.29	9485.2	1	4.84739e-05
187.871	1.207	1464.58	12404	12547	1	5.0645e-05
287.111	9.07	547.575	2472.64	0	1	5.6322e-05
171.139	12.2887	8054.33	51842.6	60827.8	1	5.66614e-05
157.123	12.0092	12241	69233.4	82202.3	1	5.77488e-05
644.963	12.327	1319.1	11493.9	10413.5	1	6.93485e-05
444.103	1.207	454.178	3688.56	0	1	8.40184e-05
247.024	1.824	2479.93	15272.2	14139.5	1	8.65466e-05
257.175	12.173	1902.35	13733.2	11783.8	1	9.50295e-05
155.108	11.546	812.988	8146.14	4813.67	1	9.65876e-05
389.287	14.3622	3536.44	17377.5	16175.2	1	9.6878e-05
353.181	11.971	957.345	6622.94	2885.62	1	9.7526e-05
259.059	0.9	703.322	4878.14	0	1	0.000111115
215.166	11.389	2087.68	25777.6	25257.9	1	0.000120351
158.847	1.245	397.337	5363.1	0	1	0.000122161
381.246	14.171	1665.48	19648.8	17335.1	1	0.000127176
179.841	1.207	761.183	7657.7	2539.71	1	0.000127489
241.083	5.96467	1189.11	21793.3	19786.5	1	0.000130718
147.938	1.207	897.511	6108.21	0	1	0.000139133
280.978	0.9	1128.78	8814.59	3305.72	1	0.000139683
87.0458	11.546	2714.56	15766.1	11834.2	1	0.000140403
215.166	12.126	2355.68	14510.3	9921.89	1	0.000147142
275.923	1.245	1462.21	8270.57	2004.58	1	0.000151339
101.002	0.9	1705.03	12751.9	7264.41	1	0.000156204
367.259	12.589	1439.08	12119.6	6177.02	1	0.000161897
154.015	8.416	898.479	7524.65	0	1	0.000171397
315.216	11.893	1299.43	10077.2	3087.95	1	0.000172467
349.188	12.126	2252.68	11615.3	4382.11	1	0.000183584
236.998	0.939	3343.11	19420.3	13867.2	1	0.000186064
204.943	1.824	1439.6	8321.56	0	1	0.000189549
227.165	11.468	1963.59	13848.9	6669.25	1	0.00019219
129.093	10.96	2317.59	17144.3	10388.4	1	0.000198516
455.996	0.9	1332.06	11487.3	3312.28	1	0.000200442
217.901	1.207	1444.37	11920.7	3607.45	1	0.000204858
480.971	12.01	707.113	9353.82	0	1	0.000213062
165.035	13.7545	2263.96	23482.9	17381.9	1	0.000213644
367.197	9.571	1474.72	9635.15	0	1	0.00021947
396.982	0.939	4367.91	24599.6	18238.7	1	0.000223245
299.188	11.351	2382.06	15957	7522.85	1	0.000224433
299.006	1.016	8936.98	69443.1	73260.1	1	0.000227792
149.045	1.169	1662.42	11442.1	1610.06	1	0.000230872
228.13	10.188	1440.16	11249.7	1357.42	1	0.000231159
185.154	12.9053	3875.1	26093.2	19572.4	1	0.000232617
115.077	10.38	1866.24	12945.5	3178	1	0.000236139
215.128	11.037	3558.53	20048.6	11728.6	1	0.000239901
327.165	11.701	1878	16473.2	6862.45	1	0.000248396
694.958	12.541	2554.4	20226.5	10814.2	1	0.000260854
371.244	12.627	1867.93	12577.3	1374.81	1	0.000261077
165.033	13.107	3039.65	41422.3	36609.8	1	0.000266901
333.077	11.931	3625.93	23847.1	14803.3	1	0.000269598
215.905	1.245	1131.59	14927.6	3763.06	1	0.000270475
79.9581	1.862	1733.07	12469.5	685.694	1	0.000271358
193.816	1.207	1205.91	12262	0	1	0.000279305
593.319	11.971	1185.53	12353	0	1	0.000281378
325.148	11.351	1393.8	12631.7	0	1	0.000287727
305.174	11.662	2020.55	19137.5	7070.31	1	0.000305243
176.021	14.326	2087.86	26523.4	16142.4	1	0.00030581
430.975	11.662	1391.4	16184	3301.39	1	0.000307623
229.108	8.222	2553.05	22538.1	10347.8	1	0.000322129
316.143	10.227	1974	18495.8	4999.12	1	0.000328905
194.927	1.862	2821.31	18727.9	5034.65	1	0.000333535
321.058	14.486	1900.09	38346.5	29119.1	1	0.000335284
469.23	10.533	2778.25	16157.4	686.713	1	0.000355343
176.022	14.93	2046.56	16803.1	1458.34	1	0.00035579
155.002	1.054	4271.9	24479.5	10677.1	1	0.000360262
271.118	8.416	3577.08	19108.3	3713.23	1	0.000366623
229.883	1.207	3390.65	26054.5	11561.7	1	0.00037979
241.884	1.245	1302.71	17385.4	572.085	1	0.000385432
319.14	8.416	2610.85	21307.9	5357.72	1	0.000386332
664.065	13.235	6531.29	67037.2	61240.5	1	0.000395137
185.118	10.998	5628.46	33077.6	19094.2	1	0.000400548
987.438	12.126	2792.47	18332.7	0	1	0.000417585
283.101	11.351	3585.19	26084.5	9204.07	1	0.000424046
271.191	11.351	3072.46	20757.8	2239.74	1	0.000431427
283.192	11.701	2501.78	22663.3	4373.64	1	0.000435393
243.16	11.546	3271.78	28000.1	10722.1	1	0.000439625
321.06	14.851	1926.58	29287.1	11626.7	1	0.00045222
187.134	11.507	3778.61	25624.7	7091.78	1	0.000452612
687.342	11.816	2685.76	20286.9	0	1	0.000462097
319.002	0.939	2299.46	23502.2	3781.41	1	0.000465448
157.087	9.224	2949.97	26877.4	7789.54	1	0.00046825
313.238	12.3695	6977.01	42646.9	26046.1	1	0.000490033
327.143	12.126	3175.18	21564.3	0	1	0.000491192
311.169	12.762	23836.2	187500	203728	1	0.000505603
182.009	9.224	3300.74	26752.4	5435.05	1	0.000508918
317.16	9.378	3214.4	28454	7275.81	1	0.000513658
199.133	11.156	3674.24	35976.5	16231.3	1	0.000519491
544.966	11.971	2409.26	26041.3	1204.57	1	0.000570909
223.081	12.126	4825.17	30414.2	6200.57	1	0.000578178
297.153	12.456	7795.29	63502.4	46934.3	1	0.000579029
247.118	8.388	3207.84	39721.9	17287.2	1	0.000585288
221.901	1.169	5161.88	40215.9	16807.9	1	0.000605399
255.011	0.9	3391.11	28386.5	2054.02	1	0.000608628
622.992	12.418	2064.98	27796.7	0	1	0.000633155
211.134	11.584	4025.28	27989.8	0	1	0.000637554
744.953	12.809	2771.87	58064.7	35422.8	1	0.00066792
201.114	10.495	4528.73	38807.2	11324.7	1	0.000674652
367.2	12.627	5793.13	40780.5	13674	1	0.000676179
285.208	12.327	4705.47	39795.2	12147.5	1	0.000681951
207.051	1.207	6187.83	41970.9	14700.6	1	0.000684321
315.885	1.207	3089.92	30835.2	0	1	0.000702366
691.336	12.0095	3695.02	30902.5	0	1	0.0007039
199.171	multiple		163242	162746	2	0.000710483
317.14	10.188	4894.02	37580.4	6993.31	1	0.000726761
385.208	11.816	5643.62	36354.9	4472.55	1	0.000745434
332.043	14.4528	3365.94	53352.6	24917	1	0.000754754
403.175	9.571	4759.51	36550.3	2142.36	1	0.00079295
307.041	multiple		114578	97815.7	2	0.000802034
576.244	0.977	2327.74	43411.9	10045.6	1	0.000803179
255.822	1.245	3347.13	39014.2	2311.15	1	0.000845954
337.236	0.939	3090.05	40686.8	3980.77	1	0.000853195
165.037	multiple		80207.8	52321.2	2	0.000859984
248.961	0.9	4847.57	44041.3	7250.92	1	0.000869166
273.099	8.57	4895.12	42391	4742.82	1	0.000877929
286.042	11.3685	3895.63	51900	16049.4	1	0.000885558
517.298	12.126	6841.34	40934.5	2366.16	1	0.000888677
494.97	11.662	3896.55	42510.2	4096.38	1	0.000892593
315.255	12.715	5826.84	42050.1	3314.8	1	0.000896557
203.127	12.126	5799.7	49448.4	11428.4	1	0.000915122
380.976	11.312	6179.37	45920.4	5669.32	1	0.000941198
185.082	8.261	5650.09	62464.6	25890.6	1	0.000944315
803.071	13.321	2393.53	43024.2	0	1	0.000980008
204.052	multiple		64017.7	25766.9	2	0.000981979
615.995	12.627	3045.4	44908.8	0	1	0.00102294
127.002	0.9	5425.32	47600.9	3189.35	1	0.00102531
159.103	multiple		61368	19489.5	2	0.00103764
311.223	multiple		140968	116870	2	0.00105101
561.308	11.816	7050.72	46816.6	0	1	0.00106639
229.13	10.188	8546.88	55389.9	10470.6	1	0.00106816
239.129	11.662	12687.3	77081.9	36602.8	1	0.00107929
245.139	10.418	6825.18	59790.4	13534.1	1	0.00111178
281.175	13.6695	3942.28	57542.2	10687.9	1	0.00111317
203.128	11.816	5798.25	58138.6	9808	1	0.00114302
245.103	7.557	5186.14	61438.2	11713.6	1	0.00118295
565.322	12.173	9534.49	53727.7	0	1	0.00122381
444.972	multiple		101304	54854.3	2	0.00129371
199.098	8.994	6300.49	69187	15208.2	1	0.00129487
104.021	14.5907	19155	187737	160370	1	0.00131234
103.002	14.684	3208.72	98230	49970.5	1	0.00131394
249.038	14.5907	4229.05	77002.4	23578.2	1	0.0013182
655.354	12.126	8829.02	58290.7	0	1	0.00132775
455.251	12.627	9078.92	61510.7	2622.51	1	0.00135263
873.173	13.193	3431.37	60047	0	1	0.00136776
417.222	12.2822	2078.73	78127.5	22074.9	1	0.00137161
197.808	1.322	22974.6	83392.9	26863.6	1	0.00140304
259.119	9.648	9144.3	82347.6	23555.9	1	0.00144036
291.034	14.811	3854.27	70790.1	9092.33	1	0.00144442
437.239	11.429	10659.6	63876.5	0	1	0.00145498
194.988	0.9	8323.68	67564.1	4213.1	1	0.00146111
371.245	12.126	10973.3	67434.1	1103.05	1	0.00151563
224.919	9.686	11047.5	67354.6	0	1	0.00153421
409.208	10.533	11463.2	71480.3	753.193	1	0.00161426
603.318	12.173	10481	73148.3	0	1	0.00166618
330.981	10.96	15130.5	120566	51653.7	1	0.0017916
257.879	1.169	11070.2	80638.2	1798.9	1	0.00180354
434.101	14.563	7196.49	80757.2	1693.1	1	0.0018082
509.297	12.01	12405.2	80814	0	1	0.00184079
589.3	11.816	11439.5	82648.5	0	1	0.00188257
551.308	11.701	7627.42	85402	0	1	0.00194529
249.039	14.1227	4085.78	134814	60402.9	1	0.00195444
708.072	13.193	4960.45	87214.3	0	1	0.00198657
165.02	7.673	9569.97	101845	11742.3	1	0.00210281
431.266	12.367	14543.6	96558.7	3927.85	1	0.00212683
294.983	9.99317	18817.3	131876	45572.8	1	0.0021616
230.986	9.99317	27482.1	227008	162379	1	0.00216974
213.15	11.156	11531.4	104210	9884.49	1	0.00219102
620.996	12.173	14011.3	100268	0	1	0.00228392
160.842	1.207	12730	122837	27650.7	1	0.00228696
637.343	11.893	9656.87	110372	0	1	0.00251406
391.093	12.049	11657.9	117208	4740.47	1	0.00258215
279.908	1.207	9405.94	122256	9948.74	1	0.00260088
329.233	11.429	8442.9	137511	22991.5	1	0.0027073
367.198	12.0095	23903.3	122682	3305.69	1	0.00273337
215.022	6.279	11841.2	127355	7690.48	1	0.00275876
434.1	11.662	8677.66	132194	990.957	1	0.00299281
116.929	1.824	17144.7	213772	98294.2	1	0.00305264
450.359	12.9284	12232.4	161086	33197	1	0.00305569
104.021	10.716	16349.9	479214	418426	1	0.00318226
280.984	10.6933	29019.7	195917	63975.9	1	0.00328023
244.986	8.954	6719.13	181824	43996.4	1	0.00332847
367.228	14.053	15567	152148	0	1	0.00346564
295.227	12.984	18241.7	196806	41076.9	1	0.00372367
171.103	multiple		231429	79324	2	0.00380545
245.14	multiple		215829	46091.1	2	0.00406433
535.312	12.627	25021.9	185951	0	1	0.00423561
344.98	10.6933	38628.7	244668	68608.9	1	0.00430504
623.365	multiple		216776	0	2	0.00493775
394.976	10.96	32657.9	234973	6520.72	1	0.00523171	394.975	12.026	C12H4N4O12	13	-0.05	1	found in fresh blank @ rt = 10.919 and aged blank @ rt = 12.038
427.218	12.126	43936.2	240632	5720.95	1	0.00537541	427.218	12.126	C18H36O11	1	0.51	2	found in fresh blank; uncertain
105.018	11.8072	40143	1.57369e+06	1.63029e+06	1	0.00571489	105.018	13.174	C3H6O4	1	11.81	wide peak	found in both blanks; glyceric acid?
631.31	12.126	52908.5	257536	1405.3	1	0.00584021	631.31	12.132	C26H52N2O13S	2	2.74	2	found in fresh blank; too many possibilities
215.023	multiple		304088	12936.6	3	0.00668745	215.013					multiple	found in fresh blank; uncertain
535.312	12.0095	48997.6	312770	0	1	0.00712431	535.312	12.12	C26H48O11	3	0.21	3	found in fresh blank; too many possibilities
397.267	12.6187	49787.9	362024	22384.1	1	0.0078325	397.275	12.456	C26H38O3?	8	-0.08	1	not sure
96.9607	1.862	55708.8	425620	81555.8	1	0.00818751			C8H4O6	7	nc		dihydroxyphthalate
203.129	10.188	81069	507262	5812.75	1	0.011447	203.129	10.218	C10H20O4 (Damon); C11H8O4 (Marc)	1	0.14	1	found in fresh blank; 3,10-dihydroxydecanoic acid or dihydroxynephthelene-carboxylic acid
195.811	1.169	64114.3	565083	15758.8	1	0.0125802							found in both blanks; no formula found
595.334	12.126	107321	573888	0	1	0.0130721	595.333	12.132	C28H52O13	3	0.13	1-3	found in fresh blank; uncertain
505.375	13.107	12569.6	921292	348769	1	0.0145393	505.374	13.107	C27H54O8	1	0.05	wide peak	found in both blanks; uncertain
434.101	12.984	11243.9	824758	8072.52	1	0.0186372	434.101	13.136	C31H17NS or C22H17N3O7?	24	0.41	wide peak	found in fresh blank; uncertain
168.03	9.3	79850.5	866297	6173.97	1	0.0196185	168.03	9.301	C7H7NO4	5	-1.36	1	found in fresh blank; 4-methyl-5-nitrocatechol?
181.071	12.126	178557	925167	5457.47	1	0.0209727	181.072	9.569	C6H14O6	0	-1.27	4	found in blank; mannitol or sorbitol; trimethoxytoluene, dimethoxy ethyl phenol
417.074	multiple		1.21063e+06	170412	3	0.0244264	417.073	12.599	C22H14N2O7	17	-1.75	wide peak	found in both blanks; uncertain
303.953	multiple		1.26603e+06	4543.96	3	0.0287537	303.952	1.211	C7H3N3O9S	8	-1.82	4	found in both blanks; uncertain
666.059	13.235	157171	1.52199e+06	0	1	0.0346681			too many options			1	too many options
247.026	multiple		2.43515e+06	51736.5	6	0.0545119	247.025	10.031	C12H8O6	9	0.48	wide peak	found in fresh blank; uncertain
141.017	0.9	712414	4.17419e+06	240419	1	0.0906367	141.018	0.94	C6H6O4	4	12.54	1	found in blank; kojic acid or muconic acid

## Sheet: Fresh 500C Acac vs Euc
Comparison of fresh burns of Acacia and Eucalyptus at 500 C
mzmed	rtmed	maxint	Acacia	Eucalyptus	# of peaks	Scaled Intensity Difference	MassHunter m/z	MassHunter rt	formula	DBE	mass diff	# of peaks visible for m/z ratio	iden. suggested
367.265	13.1138	1.74297e+06	3.70869e+06	1.34902e+07	1	-0.032884						1	in blank
151.04	multiple		4.0267e+06	1.10227e+07	3	-0.0183097	151.04	7.836, 8.323, 8.469, 8.909, 9.579	C8H8O3	5	-0.95	5	vanillin,† methoxybenzoic acid,* hydroxyanisaldehyde*
137.024	multiple		1.89811e+06	7.19441e+06	4	-0.0182225	7.314, 7.663, 7.990, 8.217, 8.628, 9.224	7.704	C7H6O3	5	0.72	4-5	Salicylic acid*, Dihydroxybenzaldehyde*, or hydroxybenzoic acid*
109.03	6.65408	2278177	7.22206e+06	1.61071e+07	1	-0.015262	109.03	6.634	C6H6O2	4	-3.37	1	dihydroxybenzene
121.03	8.17	986480	2.69396e+06	7.86265e+06	1	-0.0145928	121.029	8.048, 8.278, 9.426	C7H6O2	5	-0.59	3	benzoic acid† and hydroxybenzaldehyde*
181.051	8.64842	574382	864021	3.6258e+06	1	-0.00997895	181.05	8.125, 8.268, 8.664	C9H10O4	5	0.3	3	Homovanillic acid*, dimethoxybenzoic acid,* or syringaldehyde*
279.233	12.725	207503	17146.1	1.76845e+06	1	-0.00834003	279.234	13.561	C18H32O2	3	-0.01	1	found in aged blank; linoleic acid
177.055	multiple		1.41202e+06	4.19603e+06	2	-0.00800811	177.055	9.186	C10H10O3	6	1.16	1	coniferaldehyde†
207.066	9.20158	344883	323031	2.22501e+06	1	-0.0079035	207.066	9.202	C11H12O4	6	1.5	1	sinapaldehyde
123.045	8.743	953175	2.41453e+06	5.76131e+06	1	-0.00690831	123.045	8.469, 8.737	C7H8O2	4	-0.81	2	guaiacol
165.055	multiple		508886	2.32084e+06	5	-0.00676684	165.056	7.511, 7.684, 8.163, 8.623, 8.849, 8.967, 9.158, 9.313, 9.923, 10.076, 10.306, 10.536, 10.743	C9H10O3	5	-0.14	13+	hydroxy-methoxyacetophenone* (apocynin, paeonol, etc), caffeyl alcohol,* veratraldehyde,* phloretic acid*
277.217	13.241	194236	0	1.34746e+06	1	-0.00646689	277.218	13.241	C18H30O2	4	-1.11	1	octadecatrienoic acid (likely linolenic acid)
221.067	1.1775	362465	725175	2.58175e+06	1	-0.00616101	221.066	1.178, 1.446	C8H14O7	2	0.61	1-2	dimethoxydihydropyranoic acid*t
163.04	multiple		800730	2.56976e+06	3	-0.00545443	163.04	7.715, 8.086, 8.344, 8.723, 9.040, 9.281, 9.540, 9.763	C9H8O3	6	-0.14	8+	caffeic aldehyde* or coumaric acids*
167.035	7.71167	243960	374961	1.73383e+06	1	-0.00510008	167.035	7.703, 7.821, 8.048, 8.191, 8.661	C8H8O4	5	-0.03	3+	vanillic acid*†
203.07	10.9293	113874	531483	1.99019e+06	1	-0.00498581
125.025	multiple		57346.5	1.00529e+06	2	-0.00433206
175.04	multiple		618630	1.99846e+06	2	-0.0042769
161.024	multiple		402956	1.58948e+06	3	-0.00416679
179.035	multiple		327082	1.42884e+06	2	-0.00404765
249.077	11.787	124842	18009	815428	1	-0.00375878
139.04	multiple		376151	1.4085e+06	2	-0.00352848
247.061	12.45	120789	50701.3	783897	1	-0.00332661
193.051	multiple		154287	958093	2	-0.00327278
137.061	9.88958	247668	667552	1.83585e+06	1	-0.0030762
115.04	5.44358	57832.5	200003	990786	1	-0.00303696
149.061	10.119	204815	600711	1.70484e+06	1	-0.00302167
163.061	multiple		282238	1.12489e+06	3	-0.00297412
149.024	multiple		232646	961539	2	-0.00261617
161.025	8.323	105085	131619	672515	1	-0.00209694
149.025	8.78225	86629.3	165531	711116	1	-0.00199087
279.233	multiple		0	395544	2	-0.00189834
177.056	10.658	30263.7	164742	674942	1	-0.00182404
219.066	11.902	74135	11884.1	382116	1	-0.0017318
251.094	12.183	52586.4	0	354210	1	-0.00169996
197.022	1.168	80367.7	121332	555773	1	-0.00162503
281.249	13.241	54599.8	169194	631810	1	-0.00157879
197.045	8.28567	72381.3	70690.9	452680	1	-0.00156528
191.056	1.398	50036	181424	645928	1	-0.00154148
123.009	3.64775	21270.4	24700.1	360809	1	-0.00151945
75.0095	multiple		193140	655485	2	-0.0014867
455.353	12.309	27684	0	291168	1	-0.00139741
127.04	7.05675	27180.6	132410	496257	1	-0.00124422
205.051	9.509	34727	106151	449209	1	-0.001244
189.056	multiple		202510	611305	2	-0.00119418
161.061	9.547	126472	632713	1.371e+06	1	-0.00114454
101.025	2.164	29084.2	70247.1	363923	1	-0.00114312
167.036	8.705	34987	108032	429646	1	-0.00113395
195.066	multiple		1.03744e+06	2.09016e+06	2	-0.00111918
151.041	9.7	53540.9	132569	464932	1	-0.00109252
189.056	10.542	38815.1	193952	570510	1	-0.00107191
203.027	9.77417	12811.9	243669	658989	1	-0.00106945
175.04	10.3491	42684.5	125932	438708	1	-0.00102368
163.04	multiple		548932	1.18505e+06	2	-0.000971846
165.019	multiple		532181	1.15035e+06	2	-0.000949186
135.045	multiple		887055	1.78063e+06	2	-0.000925565
99.0091	6.40367	54191.5	93303.2	359369	1	-0.000923204
293.212	13.0267	26625.6	145320	431760	1	-0.000823776
177.02	8.323	20553.1	55440	270318	1	-0.000821081
179.035	8.323	31189.9	31455.3	226673	1	-0.000817657
147.045	multiple		836592	1.66179e+06	3	-0.000788708
225.056	11.155	10433	77912.7	299781	1	-0.000769432
385.258	12.725	17169.5	0	158913	1	-0.000762673
165.056	10.542	31898.5	81106.1	302988	1	-0.000757389
111.009	5.82667	60511.1	181713	481665	1	-0.000750651
161.046	multiple		236070	577656	2	-0.000744387
153.02	6.058	21650.4	18564	188228	1	-0.00074389
151.077	10.542	87376.7	362880	801927	1	-0.000731373
223.062	9.585	25095.5	36425.6	217037	1	-0.000728715
173.061	10.6575	23155	103389	332703	1	-0.000708584
241.217	12.1988	20732.4	38810	211704	1	-0.000682634
384.276	12.145	20032.4	0	142070	1	-0.000681838
215.123	10.849	11574.9	17408.5	172471	1	-0.000678193
124.017	7.711	30521.4	34658.2	195953	1	-0.00064271
211.041	10.619	13801.6	45338.1	207903	1	-0.000608316
269.213	12.9901	17282.3	113262	325823	1	-0.000590747
203.109	11.338	8884.35	50538.8	213449	1	-0.000590254
383.243	13.241	13692.2	6467.03	134280	1	-0.000588895
166.027	8.629	30036.4	44956.9	201545	1	-0.000581074
167.071	9.776	25672.5	54844	217921	1	-0.000574731
135.081	9.317	42635.7	116473	319941	1	-0.000534938
139.04	9.126	10025.2	51597.4	199984	1	-0.000516537
207.051	1.197	16654.9	46978.4	188680	1	-0.000501965
281.088	1.168	14647.1	2528.35	107817	1	-0.000495729
199.076	11.24	11000.4	90009.5	263534	1	-0.000491554
324.255	12.145	13271.8	0	100171	1	-0.000480751
275.201	multiple		0	99133.2	2	-0.000475771
225.056	multiple		57361.6	200687	2	-0.000470392
189.092	10.773	23985.9	92000.8	262672	1	-0.000470312
505.375	13.054	31801.6	209309	470326	1	-0.000459174
269.082	10.773	10376.6	26801.7	142696	1	-0.000454604
241.051	multiple		28296.2	142227	2	-0.000439511
211.061	multiple		35164.1	153773	2	-0.000435928
175.077	10.234	60019.2	305280	635698	1	-0.000428401
136.017	8.49567	87116.3	229346	498208	1	-0.00042086
181.014	7.67292	17470.5	87542	241468	1	-0.00040685
205.071	5.86508	18724	39140.1	154147	1	-0.000403567
263.077	5.8275	11268.2	16637.5	111527	1	-0.000392328
299.094	10.581	9692.94	32805.7	140114	1	-0.000390633
185.025	10.4845	10973.2	0	80828.4	1	-0.00038792
129.019	multiple		59498.6	186849	2	-0.000385626
267.233	13.3245	6985.94	0	79581.6	1	-0.000381937
245.082	10.082	13040.7	34436.7	140736	1	-0.000379607
187.04	multiple		88779.7	236555	2	-0.000372639
197.08	8.285	14740.1	28147	123309	1	-0.000349999
239.201	12.811	8796.7	0	72010.1	1	-0.000345599
213.056	multiple		35669	135465	2	-0.000343725
109.03	5.982	28085.2	79364.7	210845	1	-0.000330126
333.999	1.207	6419.62	25669.3	114279	1	-0.000327947
199.04	11.041	10172.4	17749.7	98681.8	1	-0.000321126
263.054	8.667	10454	5717.21	72940.9	1	-0.000300952
67.0197	5.827	17762.9	43665.3	139985	1	-0.000296725
405.986	1.168	9312.18	2582.9	65678	1	-0.000293021
201.056	10.504	14040.9	31747.5	113142	1	-0.000270279
233.065	1.589	3549.94	2439.4	59236.5	1	-0.000263339
161.025	10.35	13916.9	33538.4	114493	1	-0.000261374
175.025	1.819	14758.3	11111	73843.3	1	-0.000258948
244.985	9.08733	6593.08	72251.5	181255	1	-0.000249221
281.047	7.711	12402.8	22540.9	91889.7	1	-0.00024737
145.051	7.59658	36030.5	113691	254735	1	-0.000245886
197.046	8.858	11681.5	19028.2	84801.2	1	-0.000243526
211.04	11.202	10021.9	26041.6	97001.1	1	-0.000241828
215.024	1.15825	21204.2	62386.4	161208	1	-0.000237756
139.04	6.442	9095.55	16476.8	77677.7	1	-0.000231255
150.032	9.394	5800.76	0	47991.8	1	-0.000230327
387.274	13.241	6238.41	6338.65	57529.7	1	-0.00022165
171.046	10.581	7193.15	21864.1	84234.8	1	-0.000216445
307.065	8.514	9115.73	8661.49	60267.4	1	-0.000214835
173.045	1.207	5651.51	6564.54	56457.4	1	-0.000214564
175.061	6.02	13936.8	23883.2	87038.6	1	-0.000212556
169.05	6.403	8493.86	13506.6	67690.8	1	-0.00020884
505.374	12.1988	16084.4	134959	281751	1	-0.000192843
185.061	10.6555	13972.2	40490.3	112070	1	-0.000190024
274.985	1.36	2135.88	0	38739.6	1	-0.000185923
197.081	8.743	8959.95	31383.8	94556.5	1	-0.000184203
171.046	10.235	6718.13	30757	92069.1	1	-0.00017765
116.972	0.9935	22185.3	43127.5	114159	1	-0.000177397
233.064	1.207	4982.12	0	36821.2	1	-0.000176716
127.004	2.126	2779.34	0	35801	1	-0.00017182
317.25	11.864	2721.91	14407.5	61269.6	1	-0.000170284
213.039	6.2495	2571.59	0	35048.1	1	-0.000168207
217.044	10.235	12724.5	77176.1	172264	1	-0.000163766
145.014	1.934	7052.22	11229.7	53493.9	1	-0.000160265
315.089	10.006	6598.76	4881.68	41478.1	1	-0.00015713
128.035	2.087	3793.11	20800.7	69598.4	1	-0.000155336
213.017	1.168	4417.41	0	30894.2	1	-0.000148271
360.26	11.864	4313.11	40926.1	104030	1	-0.000147697
247.095	10.6937	7788.61	42126.6	104315	1	-0.00013875
111.045	6.26942	142889	513537	946566	1	-0.000131328
544.966	12.065	2543.42	0	27312.4	1	-0.000131081
225.187	14.48	2772.93	2949	30701.7	1	-0.000122014
213.019	10.35	3799.97	8726.57	40907.8	1	-0.000121363
199.021	1.398	4380.35	6222.7	36327.4	1	-0.00012089
219.067	6.634	10383.7	19065.8	58614.8	1	-0.000117526
167.012	1.398	4044.46	5934.39	35106.6	1	-0.000117508
201.149	11.7247	4782.68	19960.7	58584.1	1	-0.000109691
277.051	8.399	3625.9	2910.96	27160.9	1	-0.000105347
323.885	1.168	5598.71	10716.6	40641.8	1	-0.000102992
285.911	1.207	6079.63	22822.4	61342.1	1	-9.83443e-05
207.08	12.183	2859.44	10663.6	38861.4	1	-9.49024e-05
175.039	11.041	9655.16	23999.4	62537.4	1	-9.39689e-05
388.291	12.45	2988.27	24090.9	61846	1	-8.98648e-05
263.089	10.235	5878.27	19426	52832.6	1	-8.66809e-05
159.03	1.88533	10724.6	24959.9	62662	1	-8.63161e-05
217.085	multiple		80800.7	161747	2	-8.21552e-05
247.093	10.3482	9275.91	30531	71729.8	1	-8.19774e-05
147.03	1.168	5096.67	10416.3	35379.6	1	-8.03168e-05
321.887	1.168	4926.84	12865.1	39758.6	1	-8.02966e-05
146.061	10.427	4038.94	27454.4	65730.4	1	-7.96135e-05
171.103	10.465	6619.15	21189.7	53288.9	1	-7.37197e-05
159.046	10.044	26494.2	108563	209419	1	-7.24568e-05
209.062	6.634	6156.09	18162.7	46510.6	1	-6.71919e-05
185.118	10.273	9749.41	28268.6	63731.4	1	-6.30253e-05
217.003	0.824	23068.3	62498.7	123809	1	-5.73049e-05
253.18	12.183	2298.33	21386.3	50079.3	1	-5.66274e-05
187.04	10.3876	18149	85820.9	164955	1	-5.44257e-05
309.08	9.547	10689.5	32075	67418.7	1	-4.80232e-05
241.054	9.929	2559.07	8903.24	25593.1	1	-4.63459e-05
134.865	1.168	1864.49	2345.85	12000.8	1	-3.74437e-05
297.243	12.909	7696.09	28287.6	57626.7	1	-3.3564e-05
108.022	6.672	18670.1	86935.2	161986	1	-3.06059e-05
251.037	6.634	6220.91	23101.3	46609.3	1	-2.52406e-05
143.035	4.093	8326.25	18464.1	37211	1	-1.99713e-05
161.045	2.35117	4588.54	37644.9	71276	1	-1.86872e-05
229.051	10.197	9503.27	69260	127225	1	-1.56169e-05
171.082	11.787	4905.21	26714.9	50352.9	1	-1.2165e-05
337.078	9.547	4515	15864.1	30293.6	1	-9.10779e-06
199.098	9.01083	7588.89	46471.5	84379.6	1	-5.75007e-06
136.017	8.97283	6276.67	32150.1	58530.5	1	-4.72103e-06
191.153	9.35383	2915.85	23023.7	39608.3	1	7.69232e-06
227.202	13.0038	49228.3	183210	325302	1	1.26401e-05
165.092	11.179	20149.7	93368.5	164041	1	1.48002e-05
226.916	9.853	5012.27	26744.6	44541.8	1	1.59795e-05
285.122	10.273	2049.78	11678.5	17416.5	1	1.67366e-05
273.096	8.285	2295.31	23355.5	37231.3	1	2.19508e-05
203.021	8.629	3815.12	19250.6	29667.7	1	2.29876e-05
173.081	9.16333	7440.51	34098.8	54422.6	1	3.17346e-05
217.042	10.887	8155.08	43799.3	69991.1	1	4.03492e-05
241.18	12.145	3991.92	23958.7	33365	1	4.56887e-05
327.215	11.946	2536.99	22946.4	31439.6	1	4.62324e-05
223.08	12.1755	9810.99	47452.2	75228.2	1	4.65946e-05
108.045	1.168	4871.14	24113.5	31826.5	1	5.44013e-05
297.153	12.583	18528.1	79804.9	130591	1	5.88189e-05
94.0304	5.3665	7309.16	51892	80225	1	6.07537e-05
283.191	11.7247	3962.96	28877.8	37846.5	1	6.64372e-05
223.132	11.479	4330.15	24582	28951.5	1	7.22241e-05
293.176	11.749	9815.43	57443.8	85624.4	1	8.25327e-05
209.061	11.579	14506	96634.1	155519	1	8.37511e-05
327.217	11.479	3400.93	51537.1	74345.9	1	8.59201e-05
615.995	12.7663	2416.75	25643.8	27789.2	1	8.6924e-05
313.238	12.183	7042.68	61705.3	92028.5	1	8.84063e-05
180.989	9.67967	1625.41	23960.6	24344.5	1	8.89962e-05
333.085	5.674	1733.25	41259.1	54093.4	1	9.48258e-05
337.236	0.977	2102.84	26339.4	27235.7	1	9.55562e-05
286.048	11.632	3004.39	26481	27438.2	1	9.58005e-05
694.956	12.6488	2774.18	24651.9	24004.6	1	9.65667e-05
271.191	11.393	3407.15	42279.7	54405.1	1	0.000102097
103.004	1.819	4610.62	27123.4	27224.4	1	0.000102346
215.089	9.317	5187.73	34447.5	39662.8	1	0.000105567
307.191	12.0093	5211.77	38005	45486.1	1	0.00010818
185.118	11.041	5850.36	37762.7	45012.1	1	0.000108373
307.191	11.602	5588.56	49464.5	64365.9	1	0.000116012
190.02	14.9902	2695.13	30404.9	29701.7	1	0.000118646
243.159	11.602	4235.69	50539.7	65399.2	1	0.00012029
164.836	1.207	2875.53	28919.5	26478.8	1	0.000121353
637.342	11.8968	11216.4	66086	92652.5	1	0.000123044
79.9579	1.857	3253.16	27996.6	24249.7	1	0.000124122
273.097	8.743	6042.95	60916.4	81758.9	1	0.000130916
245.14	12.5547	8218.44	46477.8	54426	1	0.00013806
494.968	11.749	4711.84	38511.6	39932.7	1	0.000139184
190.018	14.5535	3111.53	30513.7	25288.3	1	0.000140762
159.102	10.3482	8337.29	46894.4	53935.7	1	0.000143992
478.389	13.3268	4399.84	46635	52998.8	1	0.00014626
209.113	9.815	4765.3	35418.8	31150.7	1	0.000154763
125.061	7.59658	137383	597052	1.03641e+06	1	0.000154933
305.174	11.6418	2914.41	54721.8	63897.9	1	0.000163422
435.221	12.145	7414.3	47682.3	50772.5	1	0.000165942
594.963	12.3682	2527.62	42492.8	40777.9	1	0.000169328
295.227	13.596	3218.05	40821.5	37501.1	1	0.000170698
215.023	0.398	5438.38	59196.9	69882.7	1	0.000173142
478.39	multiple		82374.1	110861	2	0.00017558
131.035	multiple		306348	510546	3	0.000181409
215.023	1.819	14559.6	79524.3	103565	1	0.000186114
208.93	1.26383	1987.25	30037.5	14471.9	1	0.000188582
259.118	9.66067	12686.5	72924.7	90889.7	1	0.000190251
380.977	11.479	9180.87	58917.4	65442.9	1	0.000192049
224.919	9.81217	7682.26	60235.4	64906.1	1	0.000205948
309.206	11.8968	10038.6	74545.2	90288.2	1	0.00020706
233.155	12.397	14635.4	68843.5	80006.7	1	0.000207423
303.953	5.405	22679.2	183979	285546	1	0.000210048
267.196	12.5473	5998.37	55900.4	55652.3	1	0.000213119
381.243	14.2609	2767.42	36036.9	20044.5	1	0.000213375
371.244	12.145	12861.8	69665.5	77379.6	1	0.000227092
160.842	1.1775	9364.39	82900.7	99597.9	1	0.000234157
98.9575	1.896	5267.42	61213.1	60508.9	1	0.00023545
694.957	13.285	1532.89	41643.9	24911.1	1	0.000238186
391.288	12.8193	5097.54	55712.3	49065.9	1	0.000243114
417.076	9.0865	2352.06	65975.9	65150.1	1	0.00025409
201.802	1.22533	4382.57	38567.6	13066.3	1	0.000268605
109.062	6.787	49519.4	171906	251489	1	0.000269788
325.184	13.2668	33495.1	224321	345132	1	0.000270633
127.001	0.90825	6672.29	59439.7	44617	1	0.000296486
391.288	13.552	4253.71	65295.9	54181.1	1	0.000300892
153.092	9.509	11177.1	96118.6	107465	1	0.000309947
431.265	12.4113	20116.7	107350	126545	1	0.000314863
175.021	14.6658	8628.43	60291	39502	1	0.000328347
139.077	8.59058	39780.4	278645	430167	1	0.000329196
551.306	11.7178	9543.34	89190.1	89703.8	1	0.000335671
144.045	9.279	10102.8	72227	58230.2	1	0.000341
132.045	9.85158	9688.62	151131	199457	1	0.000341035
213.15	11.1593	18358	117971	140090	1	0.000341094
157.086	multiple		102063	111333	2	0.000342447
311.223	12.3703	15512.5	138583	176449	1	0.000343665
279.908	1.23542	9237.37	66331.4	47105.1	1	0.000343748
61.9896	11.317	3527.24	124382	149766	1	0.000349731
339.2	13.8082	7113.9	85295.2	76491.6	1	0.000365621
179.056	1.1205	16913.1	102323	106483	1	0.000367961
129.056	multiple		485510	789381	2	0.000382281
271.228	12.954	11136.9	73041.5	50459.1	1	0.000385294
123.009	6.67417	8705.29	102897	101879	1	0.000394989
450.358	13.7385	2730.72	60302.2	22277.9	1	0.000411107
239.128	11.711	22856.7	131034	147334	1	0.000418542
295.228	13.0462	47345	404599	636482	1	0.000421027
329.233	11.4787	8528.39	140579	159076	1	0.000444187
255.197	12.1602	22156.9	140222	157459	1	0.000448882
71.0146	2.54675	9148	102005	82309.3	1	0.000481242
391.289	12.2997	3134.17	65447.8	13998.3	1	0.000495047
219.029	12.0977	11573.6	102173	78378.6	1	0.000501557
367.198	12.0235	27226	146113	156838	1	0.000502466
444.973	11.479	22593	141566	147459	1	0.00050842
199.805	1.207	14539.5	95377.7	64496.6	1	0.000509802
180.99	9.06783	3798.6	86052.5	43934.5	1	0.000528378
162.839	1.19667	9185.87	99026.3	61866.4	1	0.000553769
311.169	12.8876	44074.9	294083	407775	1	0.000569276
191.021	8.66783	54678.2	498645	771503	1	0.000580925
199.171	multiple		209108	252862	2	0.000582776
235.082	1.187	7595.07	80894.7	15229.6	1	0.000621834
417.074	10.5013	7426.11	141711	117241	1	0.000654689
391.095	12.0977	10393.3	138172	109402	1	0.000661909
294.983	10.1	19948.9	157317	141773	1	0.000671023
160.936	multiple		195350	207325	2	0.000683138
230.986	10.081	30925.7	207649	225560	1	0.000701276
245.139	multiple		236507	272513	2	0.000723835
417.322	12.1365	10631.9	156404	123310	1	0.000751783
394.976	11.117	39102.5	241985	263537	1	0.000813975
116.929	1.8325	21104.9	277111	323537	1	0.000827771
181.07	9.585	37819.7	263460	293793	1	0.000853249
427.219	12.1602	46181.4	244807	258082	1	0.000864399
191.019	1.88533	19457.5	215073	198725	1	0.000893842
417.073	9.81217	11086.9	204888	176200	1	0.000914448
171.102	multiple		285990	312810	2	0.000955522
303.952	multiple		368086	455144	2	0.000977661
130.944	11.28	20723.2	411787	514337	1	0.00106899
535.313	12.6588	29754.3	231828	179930	1	0.00112798
197.808	1.168	56476.5	199702	114492	1	0.00116606
168.03	9.3165	18571.7	206630	125869	1	0.00117097
234.99	multiple		249405	191347	2	0.00122418
149.06	8.24717	39482.6	245862	170859	1	0.00129207
97.0288	3.512	10074.9	172784	20906	1	0.00138396
193.071	1.168	48692.4	192117	55171.5	1	0.00138559
149.046	1.1775	46231.2	317358	275920	1	0.00140204
417.191	11.4785	48924	258797	145538	1	0.00152471
209.083	10.156	41731.7	302003	193501	1	0.00166569
89.025	1.73542	56995.5	482607	516088	1	0.00166896
203.129	10.234	113874	585620	688917	1	0.00172444
191.02	multiple		393349	339393	2	0.00175021
234.989	multiple		450456	434957	2	0.00178215
94.0303	1.1775	58412	415790	347637	1	0.00190343
96.9607	1.89067	147199	977337	1.32709e+06	1	0.0020267
191.019	11.825	35366.9	620467	675522	1	0.00208808
115.004	multiple		495790	446434	2	0.00211651
209.117	10.159	41731.7	264778	30314.8	1	0.00212909
595.334	12.1602	121637	631369	649057	1	0.00230875
234.989	multiple		601911	551017	4	0.00252621
367.229	14.1187	42290.7	437858	247292	1	0.00257459
535.313	12.1602	148010	773240	790652	1	0.00284793
450.359	12.7492	12015.2	425245	165914	1	0.00285679
69.0349	7.596	25550.4	390008	58023.6	1	0.00307188
223.02	0.90825	108409	619553	459177	1	0.00311853
303.953	multiple		2.06821e+06	2.99701e+06	6	0.00338341
195.811	1.168	107408	483530	107737	1	0.0036367
435.202	10.7718	94346.6	552444	224414	1	0.00366874
105.018	10.926	41557.1	1.30391e+06	1.53197e+06	1	0.00384882
736.137	13.0107	52627	535134	0	1	0.00459706
135.045	9.47	205977	1.65944e+06	1.83793e+06	1	0.00543462	135.045	8.782, 9.317	C8H8O2	5	-2.25	2	anisaldehyde, Acetophenone, methylsalicylaldehyde, methylbenzoic acid
181.072	multiple		1.37906e+06	1.33294e+06	2	0.00544957	181.072	9.569	C6H14O6	0	-1.1	4	found in blank; mannitol, sorbitol, galactitol
133.05	1.896	96867.1	1.10741e+06	707963	1	0.00611549	133.049	1.881	C5H10O4	1	3.92	1	deoxyribose or monoacetalglycerolt
417.074	multiple		2.19248e+06	2.21279e+06	5	0.00821463							in blank
666.06	13.3712	133243	1.34447e+06	336250	1	0.00993594						1	too many options
477.213	11.28	311207	1.64682e+06	401567	1	0.0122197	477.213	11.381	C25H34O9	9	1.11	1	found in aged blank, too many possibilities
435.085	12.494	49910.1	4.24337e+06	4.13059e+06	4	0.0166287	435.084	12.483	C22H16N2O8	16	-2	wide peak	found in blank; unknown
232.976			4.47322e+06	4.52028e+06	7	0.016733							in blank
100.933	multiple		4.70474e+06	4.10599e+06	15	0.0207101							in blank
191.02	multiple		6.79643e+06	7.38801e+06	12	0.0229274			C6H8O7	3	-2.5	W	Citric acid
152.037	9.01067	35784.3	5.2387e+06	2.72957e+06	10	0.031903	152.035	10.299	C7H7NO3	5	4.2	1	nitroanisole*, nitrocresol, or nitrobenzyl alcohol*
141.017	0.90825	1.05857e+06	7.22578e+06	5.44943e+06	1	0.0359195	141.018	0.94	C6H6O4	4	12.54	1	found in blank; kojic acid or muconic acid

## Sheet: Fresh 800C Acac vs Euc
Comparison of fresh burns of Acacia and Eucalyptus at 800 C
mzmed	rtmed	maxint	Acacia	Eucalyptus	# of peaks	Scaled Intensity Difference	MassHunter m/z	MassHunter rt	formula	DBE	mass diff	# of peaks visible for m/z ratio	iden. suggested
367.265	13.08	3.6533e+06	2165.11	2.91014e+07	1	-0.27135						1	in blank
118.969	0.948	153970	12904.2	1.82789e+06	1	-0.016858	119.037	0.943	C5H4N4	6	-2.57	1 to 3	found in both blanks; purine
232.975	multiple		1.32855e+06	2.71503e+06	3	-0.00599146	232.976	0.835	C7H6O7S	5	4.27	1	found in both blanks; uncertain
96.9607	1.889	110373	425620	1.2605e+06	1	-0.00556288	96.992	1.857	C8H4O6	7	9	1	dihydroxyphthalic acid
249.978	multiple		162964	736290	2	-0.00449545							found in blank; no distinct peak
982.992	multiple		1.73152e+06	2.90694e+06	7	-0.00191896
434.101	14.6295	8303.24	80757.2	319360	1	-0.00180333
195.811	1.17742	116114	565083	981793	1	-0.000935021
736.136	12.998	9306.06	5212.77	85357.8	1	-0.000720159
325.185	13.2193	32263.4	137647	271608	1	-0.000530425
435.198	10.76	8723.04	0	56828.2	1	-0.000529943
279.233	12.712	6053.41	9838.69	58886.6	1	-0.00040601
305.023	0.909	126857	375174	627919	1	-0.000397719
806.215	12.673	3190.5	0	34305.2	1	-0.000319908
265.148	12.4893	24933.2	70749.8	142625	1	-0.000300792
156.991	0.909	9539.14	18370	60155.1	1	-0.00029373
194.928	1.87	12680.5	18727.9	55791	1	-0.000247827
367.228	14.1455	26031.3	152148	252905	1	-0.000145053
417.192	11.496	5247.55	20190.9	47034.7	1	-0.000144887
199.17	13.479	21422.4	96897.9	164171	1	-0.000121327
185.875	1.21542	5593.6	13385.7	33133.4	1	-0.000114252
261.041	14.984	12235.6	60635.8	106483	1	-0.000110893
201.802	1.215	5467.5	27778.3	54990.8	1	-0.000108703
87.0458	11.5792	2997.24	15766.1	35934.8	1	-0.000105748
92.9285	1.177	4560.55	12215.8	30302.4	1	-0.000104872
193.816	1.21542	2461.21	12262	29025.6	1	-9.22922e-05
213.185	11.65	2344.22	9394.02	24169.5	1	-8.873e-05
241.217	12.159	3661.91	22189.1	43238.5	1	-8.04179e-05
196.886	1.87	4422	10675	24892.4	1	-7.68363e-05
445.2	12.082	2867.88	5276.07	16431.3	1	-7.64741e-05
187.871	1.21583	2591.31	12404	26840	1	-6.98456e-05
293.211	12.998	9124.64	71655.8	118967	1	-6.69952e-05
279.908	1.23442	13707.6	122256	197316	1	-6.15219e-05
389.289	13.602	5539.65	30214.6	53276.6	1	-5.72757e-05
236.998	0.9665	3367.77	19420.3	36253	1	-5.55559e-05
179.84	1.23442	1217.45	7657.7	17799.2	1	-5.45831e-05
175.022	10.875	6368.07	20154.3	37196.3	1	-5.36737e-05
315.885	1.19642	6171.4	30835.2	52829.5	1	-4.40791e-05
143.108	11.7375	2995.2	21623.2	38132.7	1	-4.10372e-05
353.181	12.0412	1588.86	6622.94	14686.4	1	-4.0609e-05
350.048	14.67	1079.46	2504.05	8153.56	1	-3.96071e-05
215.905	1.27292	3847.42	14927.6	27110.9	1	-3.56586e-05
210.901	1.908	1763.58	5931.81	12434.1	1	-2.96591e-05
422.329	12.197	1156.92	11574.2	21089.3	1	-2.82898e-05
267.943	1.21583	3409.79	28850.8	48039.5	1	-2.82783e-05
155.002	1.063	6962	24479.5	41113.1	1	-2.72789e-05
184.884	1.253	1488.84	11595.4	20685.3	1	-2.42137e-05
291.194	12.766	1375.44	6098.46	11753.3	1	-2.08868e-05
381.244	14.2826	2871.63	19648.8	32884.6	1	-2.08199e-05
263.852	1.177	2047.12	8678.34	15425.7	1	-1.76024e-05
243.16	11.5761	3335.99	28000.1	45408.7	1	-1.61197e-05
978.975	2.681	1722.51	7821.3	13835.4	1	-1.52395e-05
358.039	14.946	1365.39	5920.35	10630.8	1	-1.30093e-05
280.978	0.909	1906.37	8814.59	14613.1	1	-8.0425e-06
228.886	1.177	1301.56	6204.88	10515.3	1	-7.79375e-06
565.322	12.2295	9534.49	53727.7	84483.2	1	-6.23231e-06
235.918	1.215	3019.09	23879.3	37897	1	-6.01906e-06
305.176	11.611	2735.25	19137.5	30484.8	1	-5.8786e-06
473.221	11.925	2931.84	11513.7	18367.4	1	-3.78734e-06
227.165	11.496	2218.26	13848.9	21988.7	1	-3.58626e-06
79.9581	1.87	3412.92	12469.5	19513	1	-5.65537e-07
104.021	13.826	17511.8	149702	233339	1	1.82698e-06
283.037	0.909	946.26	5450.6	8101.82	1	3.74038e-06
201.024	14.7712	1429.52	10036.4	15246.2	1	3.82817e-06
147.938	1.21583	909.085	6108.21	9033.85	1	4.61532e-06
173.118	10.722	2750.76	13499	20533.1	1	4.89883e-06
273.827	1.177	486.745	2172.42	2733.92	1	6.10854e-06
168.066	6.747	409.453	2896.6	3694.17	1	7.68891e-06
241.884	1.23442	2847.02	17385.4	26262	1	8.011e-06
367.259	12.7153	1948.67	12119.6	17865.3	1	9.7087e-06
647.011	0.909	1523.52	9038.02	12763.8	1	1.24532e-05
444.103	1.21583	464.586	3688.56	4384.41	1	1.27732e-05
158.847	1.25383	591.841	5363.1	6954.83	1	1.31634e-05
325.149	11.4139	1720.51	12631.7	18174.9	1	1.42728e-05
381.007	0.928	1270.35	9824.29	13637.8	1	1.57416e-05
175.096	8.216	1882.16	8594.76	11440	1	1.83499e-05
463.009	0.947	1343.02	9022.22	11892.8	1	2.03466e-05
311.223	12.3711	11983.9	110006	169375	1	2.08379e-05
716.334	12.159	1484.82	9116.32	11979.3	1	2.09082e-05
155.108	11.5792	934.704	8146.14	10304.2	1	2.24161e-05
455.996	0.928	1545.02	11487.3	15231.5	1	2.50724e-05
315.216	11.9405	1299.43	10077.2	12999.5	1	2.53731e-05
362.983	0.909	1585.05	10420.9	13233	1	2.8196e-05
299.187	11.3564	2382.06	15957	21798.7	1	2.88543e-05
277.861	1.253	5667.92	33588.4	48983	1	3.18437e-05
271.228	13.0224	2270.66	18562	25405.2	1	3.31178e-05
269.212	12.365	1888.54	12652.2	16153.6	1	3.3419e-05
331.159	10.218	2444.02	14719.2	19280.7	1	3.43281e-05
287.111	9.04983	547.575	2472.64	0	1	3.59707e-05
449.1	12.042	8068.79	52376.1	77847.9	1	3.59817e-05
593.319	12.0412	1208.29	12353	15395.9	1	3.61339e-05
206.935	1.215	667.1	6891.13	6824.77	1	3.66053e-05
419.239	0.947	1074.06	9479.26	10668.1	1	3.8416e-05
159.103	12.0838	3346.16	22208.6	30487.1	1	3.87776e-05
367.197	9.55233	1636.74	9635.15	10848	1	3.90063e-05
297.153	12.5564	10988.7	63502.4	94739	1	4.03275e-05
183.102	10.913	2040.27	10370.6	11662	1	4.21148e-05
644.963	12.4302	1745.01	11493.9	13319.3	1	4.30008e-05
129.092	10.9755	2691.25	17144.3	22013	1	4.41277e-05
115.077	10.3678	1866.24	12945.5	15410.4	1	4.46177e-05
197.117	10.837	2118.58	11999.9	13790.8	1	4.59637e-05
204.943	1.832	1439.6	8321.56	8030.9	1	4.6167e-05
275.923	1.25383	1794.74	8270.57	7941.15	1	4.62621e-05
149.045	1.17783	1707.61	11442.1	12837.7	1	4.67384e-05
396.981	0.9475	4078.4	24599.6	33305.8	1	4.72742e-05
223.082	12.1847	4859.49	30414.2	42359	1	4.74375e-05
161.005	1.87	1363.73	9031.86	8959.88	1	4.78369e-05
215.129	11.054	3558.53	20048.6	25918.8	1	4.99553e-05
154.015	8.39633	898.479	7524.65	6347.47	1	5.02725e-05
253.144	11.264	1841.44	9541.6	9493.75	1	5.02739e-05
480.971	12.0838	707.113	9353.82	9183.36	1	5.04367e-05
358.042	14.432	936.484	10898.3	11445.4	1	5.18103e-05
363.056	10.913	1710.68	10729.2	10988	1	5.36167e-05
560.989	0.947	2255.79	13309.7	15002.4	1	5.37203e-05
465.175	11.5792	1762.1	14269.6	16453.4	1	5.41531e-05
345.057	10.489	3180.31	13778.2	15685.9	1	5.41617e-05
389.289	14.6495	1852.43	13163.5	14715.3	1	5.42715e-05
316.143	10.2132	2521.3	18495.8	22962.9	1	5.49298e-05
217.901	1.21583	1444.37	11920.7	12600.1	1	5.59162e-05
978.974	4.421	1839.6	21656.9	27663.4	1	5.70833e-05
345.228	12.235	3154.82	19153.4	23710.3	1	5.75264e-05
259.059	0.909	703.322	4878.14	1435.88	1	5.75746e-05
978.982	0.909	1843.67	15845.6	18277	1	6.00752e-05
125.044	0.909	3502.43	20782.2	25341.6	1	6.60099e-05
311.222	11.7777	5199.16	30961.8	41111.5	1	6.70374e-05
207.011	9.105	3038.91	20460.4	24575.8	1	6.84705e-05
257.175	12.262	1902.35	13733.2	14063.9	1	6.86334e-05
239.969	0.50275	899.001	8330.89	5615.53	1	6.88269e-05
101.002	0.909	1705.03	12751.9	12419.3	1	6.96939e-05
978.973	0.559	1720.05	20201.1	24016.7	1	6.99105e-05
287.188	11.573	3021.06	15343.2	16379.8	1	7.04583e-05
149.062	11.032	1379.89	12072.6	11202.6	1	7.11584e-05
228.13	10.1738	1631.23	11249.7	9912.3	1	7.12192e-05
287.038	14.8603	970	8417.81	5366.67	1	7.24121e-05
478.984	0.909	6327.68	36002.2	48272.1	1	7.35872e-05
283.192	11.7375	3156.78	22663.3	27327.3	1	7.48578e-05
333.077	11.9612	4608.4	23847.1	29027.5	1	7.62244e-05
314.979	0.985	3300.1	19981.9	22760.5	1	7.84372e-05
551.308	11.777	23826.6	85402	124773	1	7.88363e-05
319.14	8.39633	2642.43	21307.9	24756.4	1	7.91146e-05
201.038	0.909	3959.48	27433.2	34266.8	1	7.95349e-05
229.883	1.17742	7379.85	26054.5	32014	1	8.04865e-05
159.012	1.832	2216.47	14910.4	14387.6	1	8.27403e-05
295.003	1.024	1437.15	13433.6	11593	1	8.73173e-05
134.895	1.832	1907.06	13556.7	11665.2	1	8.84337e-05
383.192	11.728	3421.14	19067	20190.1	1	8.90976e-05
247.024	1.832	2786.54	15272.2	13990.3	1	9.17079e-05
561.308	11.859	9239.03	46816.6	63110.1	1	9.25411e-05
283.102	11.3949	4620.48	26084.5	30734.3	1	9.28563e-05
652.228	1.908	5128.75	52394.5	71627	1	9.42612e-05
469.23	10.5227	2778.25	16157.4	15076.5	1	9.44564e-05
223.02	0.909	86013.7	326933	499748	1	9.57292e-05
505.372	12.159	6672.56	63475.3	88664	1	9.65839e-05
687.342	11.872	3371.88	20286.9	21059.6	1	9.87357e-05
341.182	12.004	8000.94	39917.2	51545.9	1	0.000100012
349.188	12.2105	2252.68	11615.3	7308.71	1	0.000100817
295.228	13.0688	31299.4	196806	296114	1	0.00010166
371.244	12.7565	1867.93	12577.3	8692.7	1	0.000101906
545.275	12.159	2859.29	18563.3	17448	1	0.000107341
601.301	12.197	1890.16	17901.2	16315.1	1	0.000108274
327.165	11.747	1878	16473.2	13989.5	1	0.000109187
430.974	11.7163	1391.4	16184	13463.5	1	0.000109884
159.103	10.3115	6574.58	39159.3	49039.9	1	0.000112356
978.977	multiple		38406.4	47809.8	2	0.000112874			all the same thing?
339.165	11.7047	2091.91	16728.5	13817.2	1	0.000114508
381.062	9.95	8858.15	43573.4	55533.4	1	0.000116016
794.95	13.2275	1798.58	11864.7	5935.31	1	0.000117253
694.958	12.6633	2554.4	20226.5	18846.1	1	0.000118499
182.009	9.26908	3300.74	26752.4	28899.6	1	0.000119682
185.154	12.951	5346.23	26093.2	27856.4	1	0.000119819
544.967	12.0021	2719.42	26041.3	27403.6	1	0.000123288
232.976	7.588	8297.54	35044	40850.1	1	0.000128862
138.024	9.41	2639.43	16275.6	11230.7	1	0.000132038
444.973	11.3551	16387.8	97163.7	137116	1	0.000134833
269.087	10.9187	5049.54	34057.7	38510.6	1	0.00013633
385.208	11.859	5643.62	36354.9	41867	1	0.000138449
187.134	11.5361	4036.2	25624.7	25118.7	1	0.000138534
987.438	12.2105	2792.47	18332.7	13740.4	1	0.000138561
233.155	12.4703	13681	60876	79793.6	1	0.000141491
173.083	9.143	5038.33	34546.4	38445.6	1	0.000144044
229.108	8.20283	2655.89	22538.1	19580.2	1	0.000145281
327.143	12.2105	3560.72	21564.3	17804.6	1	0.000147672
594.963	12.273	2343.59	41933.6	49540.6	1	0.000148045
319.002	0.9475	2299.46	23502.2	20700.6	1	0.000148859
271.191	11.3698	3072.46	20757.8	16373.4	1	0.000149286
221.902	1.17742	6795.23	40215.9	46675.3	1	0.000149777
215.166	multiple		40288	46478	2	0.000152666
157.087	9.20417	3106.16	26877.4	25556.8	1	0.000152673
165.02	7.68617	10466.6	101845	142224	1	0.000155299
271.118	8.39633	3577.08	19108.3	12912	1	0.000157569
211.133	11.5966	5520.44	27989.8	26582.1	1	0.000159294
165.035	13.9287	2263.96	23482.9	18964.4	1	0.000164768
622.992	12.5295	2064.98	27796.7	25616	1	0.000165494
380.976	11.3551	7436.2	45920.4	53881.4	1	0.000165564
185.118	11.0147	5628.46	33077.6	33842.7	1	0.000165602
176.022	14.9518	2046.56	16803.1	8407.66	1	0.000166039
437.239	11.4557	12750.2	63876.5	81756.9	1	0.000166832
127.001	0.909	5439.64	47600.9	56123.9	1	0.000169098
227.165	12.235	1252.52	28404.1	25797.2	1	0.00017264
285.208	12.3976	5309.3	39795.2	43532.5	1	0.000172965
232.976	7.06825	8980.12	44755.2	50854.9	1	0.000176836
255.011	0.928	3391.11	28386.5	25103.5	1	0.000178854
259.154	8.987	3002.74	41711.3	44875.1	1	0.000188319
317.16	9.3585	3214.4	28454	24152.6	1	0.000188704
325.201	11.9002	2212.38	24073.9	16745.3	1	0.000194059
176.021	14.465	2058.41	26523.4	20149.9	1	0.000197944
403.175	9.57717	4759.51	36550.3	35296.9	1	0.000202559
204.052	14.075	1521.19	41636.5	43020.4	1	0.000204526
315.254	12.7818	5826.84	42050.1	43560.1	1	0.000205511
219.123	8.255	2955.57	36017.2	34011.9	1	0.000206787
301.218	12.9022	1812.88	19200.7	7731.77	1	0.000207221
201.114	10.5061	5117.74	38807.2	38152.3	1	0.000208764
494.97	11.6973	4250.39	42510.2	43530.7	1	0.000212478
130.018	multiple		71828.5	89220.7	3	0.00021291
317.14	10.1738	4894.02	37580.4	35145	1	0.000218962
207.051	1.19642	6295.15	41970.9	41972.4	1	0.000219164
337.237	0.9665	3129.16	40686.8	39701.8	1	0.000221658
273.098	8.5945	6364.02	42391	41898.3	1	0.000225967
189.033	12.813	1758.08	46904.8	48832	1	0.000226971
517.3	12.1847	6841.34	40934.5	39307.9	1	0.000228934
576.244	0.986	2327.74	43411.9	41803.8	1	0.000241699
171.139	12.542	11658.2	64806.9	74630.3	1	0.000246825
293.176	11.7375	9504.67	66947.3	77804.9	1	0.000248358
505.302	12.197	7391.38	54688.5	58366.3	1	0.000251294
321.058	14.6047	1900.09	38346.5	32770.9	1	0.000252246
187.098	9.88708	9519.65	62448.9	70087.7	1	0.000254883
157.123	12.1847	12241	69233.4	80591.7	1	0.000255626
307.043	13.0448	2273.6	21164.2	5507.09	1	0.000256531
978.978	10.218	3115.29	59561.6	64964.3	1	0.000260658
229.13	10.1738	9523.09	55389.9	58322.9	1	0.000261903
803.07	13.4424	2639.42	43024.2	38804.6	1	0.000264028
615.994	12.7342	3045.4	44908.8	41727.8	1	0.000264185
213.15	11.1744	13736.6	104210	134091	1	0.00026555
199.134	11.1554	3674.24	35976.5	27608.6	1	0.000265909
321.06	14.8942	2090.83	29287.1	17172.4	1	0.000265916
309.206	11.886	7052.52	58723.3	62901.7	1	0.000267697
307.043	12.6133	2462	61350.8	66832.3	1	0.000269267
224.919	9.713	11262.3	67354.6	75829	1	0.000272709
299.202	12.2037	5796.66	45032.6	39712.8	1	0.000284776
313.238	12.3298	6554.41	52659.3	50857.6	1	0.000291797
341.232	12.12	7127.27	39912.5	30941.1	1	0.00029209
664.065	13.3493	6531.29	67037.2	73007.3	1	0.000294404
450.359	12.8593	12540	161086	218763	1	0.000303356
339.2	13.6597	6995.43	56636.7	55786.8	1	0.000303691
371.245	12.159	11642	67434.1	72327.1	1	0.000306521
245.139	10.4091	8605.28	59790.4	60132.8	1	0.000309042
277.912	1.215	4463.06	28916.9	11033.5	1	0.000317777
873.173	13.3598	3431.37	60047	59312.9	1	0.000320421
332.044	14.5363	2588.57	53352.6	48341.2	1	0.000325348
455.251	12.6958	9385.88	61510.7	61055.2	1	0.000325466
165.033	13.2697	3039.65	41422.3	29546	1	0.000327064
978.976	multiple		103606	126206	3	0.000330303
603.318	12.262	10481	73148.3	78218.1	1	0.000334713
177.128	13.08	5471.1	48065.2	38791	1	0.000337489
239.129	11.6973	15033.4	77081.9	83681	1	0.000340995
160.842	1.21542	14598	122837	154392	1	0.000347209
978.977	multiple		73443.5	77220.8	2	0.000348309
194.988	0.909	8323.68	67564.1	68012.9	1	0.000348644
311.169	12.8576	30632.3	187500	254929	1	0.000350353
255.823	1.21542	4162.88	39014.2	23187.7	1	0.000351325
245.103	7.54083	5487.45	61438.2	57994.2	1	0.000352956
367.2	12.7565	5793.13	40780.5	25518.5	1	0.000355286
216.934	0.986	4331.92	38795.3	22088.3	1	0.000358393
203.129	12.0155	5798.25	58138.6	51968.9	1	0.000361143
744.953	12.9527	2771.87	58064.7	51625.6	1	0.000363268
431.265	12.4194	17000.2	96558.7	111286	1	0.000366902
978.979	7.599	2896.93	84811.3	92682.7	1	0.000369493
176.022	13.8463	1944.32	94276.5	106804	1	0.000375505
620.996	12.262	15100.7	100268	116142	1	0.000375587
165.037	14.8413	2962.6	58155.4	49685.5	1	0.000382682
185.082	8.24842	6166.38	62464.6	55798.9	1	0.000388359
103.024	14.8315	3271.37	49352.1	35103.9	1	0.000390593
509.297	12.0838	14459.6	80814	84062.4	1	0.000391731
257.879	1.17742	12994.9	80638.2	83123.8	1	0.000397927
409.208	10.5443	11463.2	71480.3	68823.5	1	0.000398057
130.945	7.46333	6679.08	54392.1	41829.4	1	0.000401196
589.3	11.872	14835.7	82648.5	84849.8	1	0.000411074
391.093	12.0842	11657.9	117208	138339	1	0.00041502
190.018	multiple		104007	117569	3	0.00041667
307.191	11.69	6772.23	120375	143079	1	0.000416885
245.14	multiple		129950	157472	2	0.000421962
665.375	12.312	5273.78	65650.8	57123.7	1	0.000422357
269.212	12.8828	4571.11	55988.4	41964	1	0.000423162
367.198	12.159	23903.3	122682	145737	1	0.000425668
259.048	14.278	6777.45	120597	142234	1	0.000428008
297.244	13.0448	5845.33	45531.4	24113.2	1	0.000437504
433.115	10.875	11675	152565	190776	1	0.000440375
239.059	11.496	4560.99	48339.2	27004.7	1	0.000451386
190.018	13.649	3404.25	106741	116782	1	0.00046377
978.978	multiple		106768	116471	2	0.000467077
982.992	5.738	14790.5	154131	189581	1	0.000474308
248.96	0.947	4847.57	44041.3	16679	1	0.000485154
294.983	9.98283	20272.2	131876	153008	1	0.000491609
204.052	14.6695	2013.61	43094.8	14105.5	1	0.000495383
151.061	0.794	22200.6	154263	187456	1	0.000496038
691.336	12.0832	8388.67	55188.7	32725.4	1	0.000497682
391.094	12.998	13880	181949	227169	1	0.000528473
217.032	multiple		229691	301460	2	0.000530205
262.039	10.958	8930.87	87933.2	80109.9	1	0.000532155
199.098	8.98042	6653.17	69187	50786.6	1	0.000532895
259.119	9.63583	9144.3	82347.6	69468.3	1	0.000550136
217.031	11.69	6920.22	141830	162196	1	0.000550747
655.354	12.2105	8829.02	58290.7	30796.9	1	0.000560791
708.071	13.3084	4960.45	87214.3	74072.3	1	0.000578
329.233	11.4557	8442.9	137511	152288	1	0.000580299
291.034	14.8645	3854.27	70790.1	46363	1	0.000597468
330.981	10.9755	18675.6	120566	120132	1	0.000633657
631.31	12.1847	65678.4	257536	333451	1	0.000636959
637.343	11.9405	10017.8	110372	100966	1	0.000664097
227.202	13.0459	13807	102882	86473.1	1	0.000690283
434.1	7.404	7263.4	133010	132833	1	0.000696252
307.042	14.1377	4485.91	160501	173979	1	0.000712465
978.977	multiple		182609	206343	4	0.000732284
978.978	multiple		174589	193012	2	0.000739936
299.006	1.0245	8623.84	69443.1	27785.9	1	0.00075111
280.983	10.5633	30508	195917	224640	1	0.000755261
116.929	1.832	21345.7	213772	249958	1	0.000778893
129.056	7.172	14236.6	241743	293538	1	0.000779412
307.041	multiple		114578	94913.3	2	0.000781716
433.113	11.728	12678.4	170678	182138	1	0.000784438
244.985	8.97992	6719.13	181824	198494	1	0.000794063
215.022	6.27133	11841.2	127355	112064	1	0.00080765
434.1	11.7047	8677.66	132194	114756	1	0.000852953
247.027	12.906	7690.62	188244	201382	1	0.000860524
245.14	12.2105	13982.4	129929	102847	1	0.000931051
535.313	12.6958	25021.9	185951	189121	1	0.000941499
171.103	multiple		231429	258536	2	0.000955773
623.365	12.635	26980.2	180753	174073	1	0.00100621
215.023	1.832	11572.8	117628	74466.9	1	0.00101676
344.98	10.5633	38628.7	244668	267263	1	0.00106699
230.986	9.98283	31497.4	227008	239357	1	0.00107032
232.976	6.361	13265.8	143549	105024	1	0.00110889
68.9969	13.887	16404	277409	311918	1	0.00112686
197.808	1.40742	22974.6	83392.9	8774.19	1	0.00113134
104.021	multiple		397576	498176	3	0.00113807
262.039	multiple		207727	198079	2	0.00117475
394.976	10.9755	37226	234973	236600	1	0.00121188
427.219	12.1847	43936.2	240632	244705	1	0.00121864
130.944	multiple		319830	328502	3	0.00158933
215.023	multiple		253652	189647	4	0.00192148
217.033	multiple		503420	561951	2	0.0020831
303.953	multiple		1.26603e+06	1.74978e+06	3	0.00210025	303.952	1.211	C7H3N3O9S	8	-1.82	4	found in blank; unknown
203.129	10.1959	85388.2	507262	548616	1	0.00226335
181.072	multiple		985862	1.29065e+06	2	0.00230608
595.334	12.1847	107321	573888	639436	1	0.00238567
535.312	12.159	136635	689307	796147	1	0.00260333
291.989	multiple		1.41687e+06	1.85385e+06	5	0.00332406
140.967	1.908	9841.81	243635	13701.3	1	0.00341651
130.944	multiple		605228	569781	3	0.00349114
115.037	9.835	8317.9	296553	67008.9	1	0.00368923
291.989	multiple		722014	680486	2	0.00415774
434.101	13.1397	11243.9	824758	840500	1	0.00416021
397.275	12.5708	49787.9	362024	32164.5	1	0.00496659
617.169	13.257	9267.38	952091	948597	1	0.00500455	617.169	13.191	C21H34N2O19	6	-0.59	wide peak	found in fresh blank
141.017	0.909	922329	4.17419e+06	5.95797e+06	1	0.00516388	141.018	0.94	C6H6O4	4	12.54	1	found in blank; kojic acid or muconic acid
666.06	13.3493	171006	1.52199e+06	1.77397e+06	1	0.00559832			too many options			1	too many options
232.976	multiple		1.3894e+06	1.55463e+06	4	0.00571483	232.976	0.835	C7H6O7S	5	4.27	1	found in blank; unknown
105.018	multiple		1.4763e+06	1.64996e+06	2	0.00609006							found in blank; unknown
982.993	multiple		1.80994e+06	1.97689e+06	4	0.00789494						wide peak	no formula found
417.074	multiple		1.79762e+06	1.90909e+06	4	0.00834796							found in blank; unknown
100.934	multiple		1.98378e+06	2.14713e+06	8	0.00883633							found in blank; unknown
168.03	9.28817	79850.5	866297	281563	1	0.00997678	168.03	9.301	C7H7NO4	5	-1.36	1	found in fresh blank; 4-methyl-5-nitrocatechol?
505.375	13.257	15348.3	921292	191149	1	0.01162	505.374	13.107	C27H54O8	1	0.05	wide peak	found in blank; unknown
247.026	multiple		3.08862e+06	2.77053e+06	9	0.0190956	247.025	10.031	C12H8O6	9	0.48	wide peak	found in fresh blank
68.9965	multiple		1.5998e+07	1.41018e+07	9	0.101227						wide peak	found in both blanks; no distinct peak

[truncated: 2 more sheets: sinap vs conif, Chromophore Spectra]
